# Supplementary material for: Stress and substance abuse among workers during the COVID-19 pandemic in an intensive care unit: A cross-sectional study
Source: PLoS One. 2022 Feb 10;17(2):e0263892. doi: 10.1371/journal.pone.0263892 (PMC8830709; doi:10.1371/journal.pone.0263892)
Supplement: S7 File — (XLSX) [file pone.0263892.s007.xlsx]

## Sheet: Sheet1
Age	Sex	Profession	Exposition History	Psychiatric Disease History	If yes, which of the following	Previous COVID-19 Infection	If yes, in which patient setting have you been taken care of?	Family History of COVID-19 Infection	If yes, in which patient setting have your relative(s) been taken care of?	Are you watching (or following online) more news than usual?	Do you live with anyone who is in one of thr risk groups for COVID-19 infection?	Have you sought accommodation away from home during the pandemic?	Do you feel that your mental health is impaired during the pandemic?	1. Any reminder brought back feelings about it.	2. I had trouble staying asleep.	3. Other things kept making me think about it.	4. I felt irritable and angry.	5. I avoided letting myself get upset when I thought about it or was reminded of it.	6. I thought about it when I didn't mean to.	7. I felt as if it hadn't happened or wasn't real.	8. I stayed away from reminders of it.	9. Pictures about it popped into my mind.	10. I was jumpy and easily startled.	11. I tried not to think about it.	12. I was aware that I still had a lot of feelings about it, but I didn't deal with them.	13. My feelings about it were kind of numb.	14. I found myself acting or feeling like I was back at that time.	15. I had trouble falling asleep.	16. I had waves of strong feelings about it.	17. I tried to remove it from my memory.	18. I had trouble concentrating.	19. Reminders of it caused me to have physical reactions, such as sweating, trouble breathing, nausea, or a pounding heart.	20. I had dreams about it.	21. I felt watchful and on-guard.	22. I tried not to talk about it.	1-Tobacco and derivatives	1-Alcoholic drinks	1-Cannabis (marijuana, pot, grass, etc.)	1-Cocaine (coke, crack, etc.)	1-Stimulants and Methamphetamine (meth, Crystal, ecstasy, speed, etc.)	1-Inalants (nitrous, glue, paint thinner, poppers, whippets, etc.)	1-Sedatives (sleeping pills, Valium, Xanax, tranquilizers, benzos, etc.)	1-Hallucinogens (LSD, acid, mushrooms, PCP, Special K, etc.)	1-Opioids (heroin, opium, morphine, methadone, Vicodin, etc.)	1-Any other drugs.	2-Tobacco and derivatives	2-Alcoholic drinks	2-Cannabis (marijuana, pot, grass, etc.)	2-Cocaine (coke, crack, etc.)
Between 28 and 32 years old	Male	Medicine	Over 48 hours	No	No, I don’t have a history of psychiatric disease.	No	Not infected.	Yes	Outpatient.	No	No	No	Yes	Not at all.	Not at all.	Not at all.	Moderately.	Moderately.	A little bit.	Not at all.	Not at all.	A little bit.	A little bit.	Not at all.	A little bit.	Not at all.	Not at all.	Not at all.	Not at all.	Not at all.	A little bit.	Not at all.	Not at all.	Not at all.	Not at all.	No	Yes	No	No	No	No	No	No	No	No		Weekly	Never	Never
Between 28 and 32 years old	Male	Medicine	Over 48 hours	Yes	Anxiety Disorder(s).	Yes	Inpatient.	No	No relatives infected.	Yes	No	Yes	Yes	Moderately.	Moderately.	Moderately.	Moderately.	Moderately.	Moderately.	Moderately.	Moderately.	Moderately.	Quite a bit.	A little bit.	Moderately.	Moderately.	Moderately.	Quite a bit.	Moderately.	A little bit.	Quite a bit.	Moderately.	Moderately.	Quite a bit.	Moderately.	No	Yes	No	No	No	No	No	No	No	No	Never	Weekly	Never	Never
Between 18 and 22 years old	Female	Not a health care profession	I had no exposition to infected patients.	Yes	Anxiety Disorder(s).	No	Not infected.	Yes	Relative perished due to COVID-19.	No	Yes	No	Yes	Quite a bit.	A little bit.	Quite a bit.	A little bit.	A little bit.	A little bit.	Not at all.	A little bit.	A little bit.	A little bit.	A little bit.	Moderately.	A little bit.	A little bit.	Moderately.	A little bit.	Not at all.	A little bit.	Not at all.	A little bit.	Quite a bit.	Not at all.	No	Yes	No	No	No	No	No	No	No	No	Never	Weekly	Never	Never
Between 33 and 37 years old	Male	Nursing	Over 48 hours	No	No, I don’t have a history of psychiatric disease.	Yes	Outpatient.	Yes	Outpatient.	Yes	No	Yes	Yes	A little bit.	A little bit.	Quite a bit.	Moderately.	Quite a bit.	A little bit.	Quite a bit.	A little bit.	A little bit.	A little bit.	A little bit.	A little bit.	A little bit.	A little bit.	A little bit.	A little bit.	Quite a bit.	Quite a bit.	Quite a bit.	Moderately.	Quite a bit.	Quite a bit.	No	No	No	No	No	No	No	No	No	No	Never	Once or twice	Never	Never
Between 38 and 42 years old	Female	Nursing	Over 48 hours	No	No, I don’t have a history of psychiatric disease.	Yes	Outpatient.	Yes	Outpatient.	Yes	Yes	No	Yes	Quite a bit.	Moderately.	Quite a bit.	Quite a bit.	A little bit.	Quite a bit.	Extremely.	Quite a bit.	Quite a bit.	A little bit.	A little bit.	Quite a bit.	A little bit.	A little bit.	A little bit.	A little bit.	Moderately.	A little bit.	A little bit.	Moderately.	Moderately.	A little bit.	No	No	No	No	No	No	No	No	No	No	Never	Once or twice	Never	Never
Between 33 and 37 years old	Male	Nursing	Between 24-48 hours	No	No, I don’t have a history of psychiatric disease.	No	Not infected.	No	No relatives infected.	Yes	Yes	No	No	Moderately.	Moderately.	Moderately.	Moderately.	Moderately.	Moderately.	Moderately.	Moderately.	Moderately.	Moderately.	A little bit.	Not at all.	Not at all.	A little bit.	Moderately.	Moderately.	Not at all.	Not at all.	Not at all.	Not at all.	Moderately.	Moderately.	No	Yes	No	No	No	No	No	No	No	No	Never	Weekly	Never	Never
Between 33 and 37 years old	Female	Pharmacist	Over 48 hours	No	No, I don’t have a history of psychiatric disease.	Yes	Outpatient.	No	No relatives infected.	No	No	No	Yes	A little bit.	Moderately.	A little bit.	Moderately.	A little bit.	A little bit.	Not at all.	A little bit.	A little bit.	A little bit.	A little bit.	A little bit.	A little bit.	A little bit.	Moderately.	A little bit.	A little bit.	Moderately.	A little bit.	Not at all.	A little bit.	A little bit.	No	Yes	No	No	No	No	No	No	No	No	Never	Weekly	Never	Never
Between 28 and 32 years old	Female	Nursing	Between 24-48 hours	No	No, I don’t have a history of psychiatric disease.	Yes	Outpatient.	No	No relatives infected.	Yes	Yes	No	Yes	Quite a bit.	Moderately.	A little bit.	A little bit.	Quite a bit.	A little bit.	A little bit.	Moderately.	A little bit.	A little bit.	Quite a bit.	A little bit.	A little bit.	A little bit.	Moderately.	Quite a bit.	A little bit.	A little bit.	Moderately.	Moderately.	A little bit.	A little bit.	Yes	Yes	No	No	No	No	No	No	No	No	Weekly	Daily or almost daily	Never	Never
Between 38 and 42 years old	Male	Nursing	Over 48 hours	No	No, I don’t have a history of psychiatric disease.	Yes	Outpatient.	No	No relatives infected.	No	Yes	No	No	Not at all.	Not at all.	A little bit.	Not at all.	A little bit.	A little bit.	Not at all.	Moderately.	Not at all.	Not at all.	A little bit.	A little bit.	Not at all.	Not at all.	Not at all.	A little bit.	A little bit.	Not at all.	Not at all.	Not at all.	A little bit.	Not at all.	No	Yes	No	No	No	No	No	No	No	No	Never	Weekly	Never	Never
Between 23 and 27 years old	Female	Nursing	Between 24-48 hours	No	No, I don’t have a history of psychiatric disease.	Yes	Outpatient.	No	No relatives infected.	No	No	No	Yes	A little bit.	Not at all.	A little bit.	A little bit.	A little bit.	Moderately.	Moderately.	Not at all.	A little bit.	A little bit.	Moderately.	A little bit.	A little bit.	A little bit.	A little bit.	A little bit.	A little bit.	A little bit.	A little bit.	Not at all.	A little bit.	A little bit.	No	Yes	No	No	No	No	No	No	No	No	Never	Monthly	Never	Never
Between 38 and 42 years old	Female	Medicine	Over 48 hours	Yes	Anxiety Disorder(s).	No	Not infected.	No	No relatives infected.	No	No	Yes	Yes	A little bit.	A little bit.	Moderately.	Moderately.	Moderately.	Moderately.	Moderately.	Moderately.	Moderately.	A little bit.	Moderately.	Moderately.	Quite a bit.	A little bit.	Quite a bit.	Quite a bit.	Moderately.	Moderately.	A little bit.	Not at all.	A little bit.	A little bit.	Yes	Yes	No	No	Yes	No	Yes	No	Yes	Yes	Daily or almost daily	Daily or almost daily	Never	Never
Between 28 and 32 years old	Female	Physiotherapy	Over 48 hours	No	No, I don’t have a history of psychiatric disease.	Yes	Outpatient.	No	No relatives infected.	No	No	No	Yes	Moderately.	Moderately.	Moderately.	A little bit.	Moderately.	Moderately.	Moderately.	Moderately.	Moderately.	Moderately.	Quite a bit.	Moderately.	Moderately.	A little bit.	Moderately.	A little bit.	Moderately.	Moderately.	A little bit.	Moderately.	Moderately.	A little bit.	No	Yes	No	No	No	No	Yes	No	No	No	Once or twice	Weekly	Never	Never
Between 28 and 32 years old	Male	Nursing	Between 24-48 hours	No	No, I don’t have a history of psychiatric disease.	Yes	Outpatient.	No	No relatives infected.	Yes	No	No	No	Not at all.	A little bit.	A little bit.	Not at all.	A little bit.	A little bit.	Not at all.	A little bit.	A little bit.	A little bit.	Quite a bit.	A little bit.	A little bit.	A little bit.	A little bit.	Not at all.	Quite a bit.	A little bit.	Quite a bit.	Not at all.	Moderately.	Moderately.	No	No	No	No	No	No	No	No	No	No	Never	Never	Never	Never
Between 33 and 37 years old	Female	Nursing	Up to 24 hours	No	No, I don’t have a history of psychiatric disease.	Yes	Outpatient.	Yes	Relative perished due to COVID-19.	No	Yes	No	No	A little bit.	A little bit.	A little bit.	A little bit.	A little bit.	A little bit.	A little bit.	A little bit.	A little bit.	A little bit.	A little bit.	A little bit.	A little bit.	A little bit.	A little bit.	A little bit.	A little bit.	A little bit.	A little bit.	A little bit.	A little bit.	A little bit.	Yes	Yes	No	No	No	No	No	No	No	No	Once or twice	Once or twice	Never	Never
Between 23 and 27 years old	Male	Nursing	Over 48 hours	No	No, I don’t have a history of psychiatric disease.	Yes	Outpatient.	No	No relatives infected.	Yes	No	No	Yes	A little bit.	Quite a bit.	Moderately.	Extremely.	Quite a bit.	Moderately.	Quite a bit.	Quite a bit.	A little bit.	Moderately.	Moderately.	A little bit.	Not at all.	Moderately.	Extremely.	Quite a bit.	Quite a bit.	Quite a bit.	Quite a bit.	Quite a bit.	Moderately.	Not at all.	No	Yes	No	No	No	No	No	No	No	No	Never	Weekly	Never	Never
Between 28 and 32 years old	Female	Nursing	Up to 24 hours	No	No, I don’t have a history of psychiatric disease.	Yes	Outpatient.	Yes	Outpatient.	No	No	No	Yes	A little bit.	Not at all.	A little bit.	A little bit.	Moderately.	A little bit.	A little bit.	Moderately.	A little bit.	Not at all.	A little bit.	A little bit.	A little bit.	Not at all.	Not at all.	Not at all.	Quite a bit.	A little bit.	Not at all.	A little bit.	A little bit.	A little bit.	No	Yes	No	No	No	No	No	No	No	No	Never	Once or twice	Never	Never
Between 28 and 32 years old	Female	Nursing	Up to 24 hours	No	No, I don’t have a history of psychiatric disease.	No	Not infected.	No	No relatives infected.	No	Yes	No	Yes	Quite a bit.	Not at all.	Moderately.	A little bit.	Quite a bit.	A little bit.	Not at all.	A little bit.	A little bit.	Moderately.	Quite a bit.	Quite a bit.	A little bit.	A little bit.	Moderately.	Moderately.	Moderately.	A little bit.	A little bit.	Not at all.	Moderately.	A little bit.	No	Yes	No	No	No	No	No	No	No	No	Never	Once or twice	Never	Never
Between 33 and 37 years old	Female	Nursing	Between 24-48 hours	No	No, I don’t have a history of psychiatric disease.	No	Not infected.	No	No relatives infected.	Yes	Yes	No	Yes	A little bit.	Not at all.	A little bit.	Moderately.	A little bit.	Moderately.	Not at all.	Not at all.	A little bit.	A little bit.	Moderately.	Moderately.	A little bit.	Not at all.	A little bit.	Not at all.	A little bit.	Not at all.	Not at all.	Not at all.	Quite a bit.	Not at all.	No	No	No	No	No	No	No	No	No	No	Never	Never	Never	Never
Between 38 and 42 years old	Female	Nursing	Between 24-48 hours	No	No, I don’t have a history of psychiatric disease.	No	Not infected.	No	No relatives infected.	Yes	No	No	Yes	Quite a bit.	A little bit.	Quite a bit.	Quite a bit.	Quite a bit.	Quite a bit.	A little bit.	Not at all.	Extremely.	Extremely.	A little bit.	Quite a bit.	A little bit.	Quite a bit.	Extremely.	Extremely.	Quite a bit.	Moderately.	Extremely.	A little bit.	Extremely.	Not at all.	Yes	Yes	No	No	No	No	Yes	No	No	No	Daily or almost daily	Weekly	Never	Never
Between 38 and 42 years old	Female	Nursing	Over 48 hours	No	No, I don’t have a history of psychiatric disease.	Yes	Outpatient.	No	No relatives infected.	Yes	Yes	Yes	No	Not at all.	Not at all.	Not at all.	Not at all.	A little bit.	Not at all.	A little bit.	A little bit.	Moderately.	Not at all.	A little bit.	A little bit.	Not at all.	Not at all.	Not at all.	Not at all.	Not at all.	A little bit.	Not at all.	Not at all.	A little bit.	Not at all.	Yes	Yes	No	No	No	No	No	No	No	No	Never	Never	Never	Never
Between 33 and 37 years old	Female	Nursing	Up to 24 hours	Yes	Mood Disorder(s).	Yes	Outpatient.	No	No relatives infected.	No	Yes	No	No	Not at all.	Not at all.	Not at all.	Not at all.	Not at all.	Not at all.	A little bit.	Not at all.	Not at all.	Not at all.	A little bit.	Not at all.	Not at all.	Not at all.	Not at all.	Not at all.	Not at all.	Not at all.	Not at all.	Not at all.	Not at all.	Not at all.	Yes	Yes	No	No	No	No	No	No	No	No	Once or twice	Monthly	Never	Never
Between 38 and 42 years old	Male	Nursing	Over 48 hours	No	No, I don’t have a history of psychiatric disease.	Yes	Outpatient.	Yes	Outpatient.	Yes	Yes	No	Yes	Moderately.	Moderately.	Moderately.	A little bit.	A little bit.	A little bit.	A little bit.	A little bit.	A little bit.	A little bit.	A little bit.	A little bit.	A little bit.	A little bit.	A little bit.	Moderately.	A little bit.	A little bit.	A little bit.	A little bit.	A little bit.	A little bit.	No	Yes	No	No	No	No	No	No	No	No	Never	Monthly	Never	Never
Between 43 and 47 years old	Female	Nursing	Up to 24 hours	No	No, I don’t have a history of psychiatric disease.	Yes	Outpatient.	No	Outpatient.	Yes	No	No	Yes	Moderately.	A little bit.	Moderately.	Not at all.	Quite a bit.	Moderately.	Moderately.	A little bit.	Moderately.	Moderately.	A little bit.	A little bit.	A little bit.	Moderately.	Quite a bit.	Moderately.	A little bit.	Moderately.	A little bit.	Not at all.	Moderately.	Moderately.	No	Yes	No	No	No	No	No	No	No	No	Never	Weekly	Never	Never
Between 23 and 27 years old	Male	Nursing	Over 48 hours	No	No, I don’t have a history of psychiatric disease.	No	Not infected.	No	No relatives infected.	Yes	Yes	No	Yes	Not at all.	Not at all.	A little bit.	Not at all.	Not at all.	A little bit.	Not at all.	A little bit.	Not at all.	A little bit.	Not at all.	Not at all.	Not at all.	Not at all.	Moderately.	A little bit.	A little bit.	Not at all.	Not at all.	A little bit.	A little bit.	Not at all.	No	Yes	No	No	No	No	No	No	No	No	Never	Once or twice	Never	Never
Between 43 and 47 years old	Female	Nursing	Between 24-48 hours	No	No, I don’t have a history of psychiatric disease.	Yes	Outpatient.	No	No relatives infected.	Yes	No	No	Yes	A little bit.	Not at all.	A little bit.	A little bit.	A little bit.	Quite a bit.	A little bit.	Not at all.	Not at all.	Not at all.	A little bit.	A little bit.	A little bit.	Not at all.	A little bit.	Quite a bit.	Quite a bit.	Quite a bit.	Quite a bit.	Moderately.	Moderately.	Moderately.	Yes		No	No	No	No	No	No	No	No	Daily or almost daily	Weekly	Never	Never
Between 33 and 37 years old	Female	Nursing	Over 48 hours	No	No, I don’t have a history of psychiatric disease.	Yes	Outpatient.	Yes	Outpatient.	Yes	Yes	No	Yes	Moderately.	Not at all.	Moderately.	A little bit.	Not at all.	Not at all.	Not at all.	A little bit.	A little bit.	A little bit.	A little bit.	Not at all.	Not at all.	A little bit.	Not at all.	Not at all.	A little bit.	Not at all.	Not at all.	Not at all.	Not at all.	Not at all.	Yes	Yes	Yes	No	No	No	No	No	No	No	Once or twice	Once or twice	Never	Never
Between 38 and 42 years old	Female	Nursing	Between 24-48 hours	No	No, I don’t have a history of psychiatric disease.	Yes	Outpatient.	Yes	Outpatient.	No	Yes	Yes	Yes	Moderately.	Not at all.	Quite a bit.	Quite a bit.	Moderately.	Moderately.	A little bit.	Quite a bit.	Moderately.	Quite a bit.	Quite a bit.	Moderately.	Moderately.	Moderately.	A little bit.	Moderately.	Quite a bit.	Quite a bit.	A little bit.	Not at all.	Moderately.	A little bit.	No	Yes	No	No	No	No	No	No	No	No	Never	Once or twice	Never	Never
Between 38 and 42 years old	Female	Nursing	Between 24-48 hours	No	No, I don’t have a history of psychiatric disease.	No	Not infected.	No	No relatives infected.	No	Yes	No	No	Quite a bit.	Not at all.	A little bit.	A little bit.	Moderately.	A little bit.	Moderately.	Moderately.	Moderately.	A little bit.	A little bit.	A little bit.	Moderately.	Not at all.	Not at all.	A little bit.	A little bit.	Not at all.	Not at all.	Not at all.	A little bit.	Moderately.	No	No	No	No	No	No	No	No	No	No	Never	Never	Never	Never
Between 38 and 42 years old	Female	Nursing	Up to 24 hours	No	No, I don’t have a history of psychiatric disease.	Yes	Outpatient.	No	No relatives infected.	Yes	Yes	No	Yes	A little bit.	Not at all.	A little bit.	A little bit.	A little bit.	Not at all.	A little bit.	Not at all.	A little bit.	A little bit.	A little bit.	A little bit.	Not at all.	Not at all.	Not at all.	A little bit.	A little bit.	A little bit.	A little bit.	Quite a bit.	A little bit.	A little bit.	Yes	Yes	No	No	No	No	No	No	No	No	Never	Weekly	Never	Never
Between 43 and 47 years old	Female	Nursing	Between 24-48 hours	No	No, I don’t have a history of psychiatric disease.	No	Not infected.	Yes	Outpatient.	No	No	No	No	A little bit.	Not at all.	Moderately.	Not at all.	A little bit.	A little bit.	Moderately.	Moderately.	Not at all.	Not at all.	A little bit.	Extremely.	A little bit.	Not at all.	Not at all.	Not at all.	Quite a bit.	Not at all.	Not at all.	Not at all.	A little bit.	A little bit.	No	No	No	No	No	No	No	No	No	No	Never	Never	Never	Never
Between 48 and 52 years old	Female	Nursing	Over 48 hours	No	No, I don’t have a history of psychiatric disease.	Yes	Outpatient.	Yes	Outpatient.	Yes	Yes	No	Yes	A little bit.	Quite a bit.	Quite a bit.	A little bit.	Quite a bit.	Quite a bit.	Not at all.	Not at all.	Quite a bit.	A little bit.	Not at all.	Not at all.	Not at all.	A little bit.	Quite a bit.	Moderately.	Quite a bit.	Moderately.	Quite a bit.	A little bit.	Quite a bit.	A little bit.	No	Yes	No	No	No	No	No	No	No	No	Never	Monthly	Never	Never
Between 38 and 42 years old	Female	Nursing	Up to 24 hours	No	No, I don’t have a history of psychiatric disease.	No	Not infected.	No	No relatives infected.	No	No	No	Yes	Not at all.	Not at all.	A little bit.	Moderately.	A little bit.	A little bit.	Not at all.	Not at all.	A little bit.	A little bit.	A little bit.	A little bit.	Not at all.	Not at all.	Moderately.	Not at all.	A little bit.	A little bit.	A little bit.	A little bit.	A little bit.	A little bit.	Yes	Yes	No	No	No	No	No	No	No	No	Daily or almost daily	Weekly	Never	Never
Between 33 and 37 years old	Female	Nursing	Over 48 hours	No	No, I don’t have a history of psychiatric disease.	No	Not infected.	Yes	Outpatient.	No	No	No	Yes	Extremely.	Moderately.	Quite a bit.	A little bit.	Moderately.	A little bit.	Extremely.	A little bit.	Moderately.	A little bit.	Extremely.	A little bit.	Extremely.	A little bit.	Moderately.	Extremely.	Quite a bit.	Extremely.	A little bit.	Quite a bit.	Moderately.	Extremely.	No	Yes	Yes	No	No	No	No	No	No	No	Never	Monthly	Once or twice	Never
Between 33 and 37 years old	Female	Nursing	Over 48 hours	No	No, I don’t have a history of psychiatric disease.	No	Not infected.	No	No relatives infected.	Yes	Yes	Yes	Yes	Moderately.	Moderately.	Moderately.	Quite a bit.	Moderately.	Moderately.	A little bit.	A little bit.	Moderately.	Moderately.	A little bit.	A little bit.	Moderately.	A little bit.	Moderately.	Moderately.	A little bit.	Moderately.	Moderately.	A little bit.	Moderately.	Moderately.	No	No	No	No	No	No	No	No	No	No	Never	Once or twice	Never	Never
Between 38 and 42 years old	Female	Nursing	Up to 24 hours	No	No, I don’t have a history of psychiatric disease.	No	Outpatient.	No	No relatives infected.	Yes	Yes	No	Yes	Moderately.	Quite a bit.	A little bit.	A little bit.	A little bit.	A little bit.	A little bit.	A little bit.	Quite a bit.	Quite a bit.	A little bit.	A little bit.	A little bit.	A little bit.	Quite a bit.	A little bit.	A little bit.	A little bit.	A little bit.	A little bit.	A little bit.	Not at all.	No	No	No	No	No	No	No	No	No	No	Never	Never	Never	Never
Between 38 and 42 years old		Nursing	Between 24-48 hours	No	No, I don’t have a history of psychiatric disease.	No	Not infected.	No	No relatives infected.	Yes	No	No	Yes	Extremely.	Extremely.	Moderately.	Quite a bit.	Not at all.	Not at all.	A little bit.	Extremely.	Not at all.	Not at all.	Not at all.	Not at all.	Not at all.	Not at all.	Extremely.	Not at all.	Extremely.	Not at all.	Not at all.	Not at all.	Not at all.	Extremely.	Yes	No	No	No	No	No	Yes	No	No	No	Daily or almost daily	Never	Never	Never
Between 48 and 52 years old	Female	Nursing	Between 24-48 hours	No	No, I don’t have a history of psychiatric disease.	Yes	Outpatient.	No	No relatives infected.	Yes	Yes	No	No	A little bit.	Not at all.	Moderately.	Not at all.	Not at all.	Not at all.	Not at all.	Not at all.	A little bit.	Not at all.	Quite a bit.	Moderately.	A little bit.	Not at all.	A little bit.	A little bit.	Moderately.	Not at all.	Not at all.	Not at all.	Quite a bit.	Moderately.	No	No	No	No	No	No	No	No	No	No	Never	Never	Never	Never
Between 33 and 37 years old	Female	Nursing	Up to 24 hours	No	No, I don’t have a history of psychiatric disease.	Yes	Inpatient.	Yes	Outpatient.	Yes	Yes	Yes	Yes	A little bit.	Moderately.	Moderately.	A little bit.	A little bit.	A little bit.	Not at all.	A little bit.	Moderately.	A little bit.	Not at all.	A little bit.	Not at all.	A little bit.	Moderately.	Moderately.	A little bit.	Moderately.	Quite a bit.	Moderately.	Moderately.	Not at all.	No	Yes	No	No	No	No	No	No	No	No	Never	Once or twice	Never	Never
Between 48 and 52 years old	Female	Nursing	Over 48 hours	No	No, I don’t have a history of psychiatric disease.	Yes	Not infected.	No	No relatives infected.	Yes	No	No	No	Not at all.	Not at all.	Not at all.	Not at all.	Not at all.	Not at all.	Not at all.	Not at all.	Not at all.	Not at all.	Not at all.	Not at all.	Not at all.	Not at all.	Not at all.	Not at all.	Not at all.	Not at all.	Not at all.	Not at all.	Not at all.	Not at all.	No	No	No	No	No	No	No	No	No	No	Never	Never	Never	Never
Between 38 and 42 years old	Female	Nursing	Between 24-48 hours	No	No, I don’t have a history of psychiatric disease.	Yes	Outpatient.	Yes	Outpatient.	No	Yes	No	No	Not at all.	Not at all.	A little bit.	Not at all.	Not at all.	Not at all.	Not at all.	Not at all.	Not at all.	Not at all.	Not at all.	Not at all.	Not at all.	Not at all.	Not at all.	Not at all.	Not at all.	Not at all.	Not at all.	Not at all.	Not at all.	Not at all.	No	No	No	No	No	No	No	No	No	No	Never	Never	Never	Never
Between 33 and 37 years old	Female	Nursing	Between 24-48 hours	No	No, I don’t have a history of psychiatric disease.	Yes	Outpatient.	Yes	Outpatient.	Yes	Yes	Yes	No	Moderately.	A little bit.	Quite a bit.	A little bit.	Moderately.	A little bit.	Moderately.	A little bit.	A little bit.	A little bit.	A little bit.	A little bit.	A little bit.	A little bit.	Not at all.	A little bit.	A little bit.	Not at all.	Not at all.	Not at all.	A little bit.	A little bit.	No	Yes	No	No	No	No	No	No	No	No	Never	Once or twice	Never	Never
Between 53 and 57 years old	Male	Nursing	Between 24-48 hours	No	No, I don’t have a history of psychiatric disease.	Yes	Outpatient.	No	No relatives infected.	No	Yes	No	No	Not at all.	Not at all.	A little bit.	A little bit.	Not at all.	Not at all.	A little bit.	Not at all.	Not at all.	Not at all.	A little bit.	Not at all.	Not at all.	Not at all.	Not at all.	A little bit.	A little bit.	Not at all.	A little bit.	Not at all.	Not at all.	Not at all.	No	No	No	No	No	No	No	No	No	No	Never	Never	Never	Never
Between 38 and 42 years old	Female	Nursing	Between 24-48 hours	No	No, I don’t have a history of psychiatric disease.	No	Not infected.	Yes	Outpatient.	No	Yes	Yes	Yes	A little bit.	Quite a bit.	Moderately.	Moderately.	Moderately.	Moderately.	Moderately.	Moderately.	Moderately.	Moderately.	Moderately.	Moderately.	Moderately.	Moderately.	Moderately.	Moderately.	Moderately.	Moderately.	Moderately.	Moderately.	Moderately.	Moderately.	No	No	No	No		No	No	No	No	No	Never	Never	Never	Never
Between 38 and 42 years old	Male	Nursing	Over 48 hours	No	No, I don’t have a history of psychiatric disease.	No	Not infected.	No	No relatives infected.	Yes	Yes	Yes	No	Not at all.	Not at all.	Not at all.	Not at all.	Not at all.	Not at all.	Not at all.	Not at all.	Not at all.	Not at all.	Not at all.	Not at all.	Not at all.	Not at all.	Not at all.	Not at all.	Not at all.	Not at all.	Not at all.	Not at all.	Not at all.	Not at all.	No	Yes	No	No	No	No	No	No	No	No		Once or twice	Never	Never
Between 53 and 57 years old	Male	Nursing	Between 24-48 hours	No	No, I don’t have a history of psychiatric disease.	Yes	Outpatient.	No	No relatives infected.	No	No	No	Yes	Moderately.	Moderately.	A little bit.	A little bit.	A little bit.	A little bit.	Not at all.	A little bit.	A little bit.	A little bit.	Quite a bit.	A little bit.	Not at all.	A little bit.	A little bit.	A little bit.	A little bit.	A little bit.	Moderately.	Moderately.	A little bit.	A little bit.	No	No	No	No	No	No	No	No	No	No	Never	Never	Never	Never
Between 33 and 37 years old	Female	Nursing	Between 24-48 hours	No	No, I don’t have a history of psychiatric disease.	Yes	Outpatient.	Yes	Outpatient.	Yes	Yes	No	Yes	A little bit.	Quite a bit.	Moderately.	A little bit.	A little bit.	A little bit.	Not at all.	A little bit.	A little bit.	Moderately.	A little bit.	A little bit.	Not at all.	A little bit.	Quite a bit.	Moderately.	A little bit.	A little bit.	A little bit.	Not at all.	Quite a bit.	A little bit.	No	No	No	No	No	No	No	No	No	No	Never	Once or twice	Never	Never
Between 33 and 37 years old	Female	Nursing	Up to 24 hours	No	No, I don’t have a history of psychiatric disease.	Yes	Outpatient.	No	No relatives infected.	No	Yes	Yes	No	A little bit.	Moderately.	A little bit.	Not at all.	Not at all.	A little bit.	A little bit.	A little bit.	A little bit.	Not at all.	Moderately.	Quite a bit.	Moderately.	Not at all.	Not at all.	A little bit.	Quite a bit.	Not at all.	Not at all.	Not at all.	A little bit.	Not at all.	No	Yes	No	No	No	No	No	No	No	No	Never	Weekly	Never	Never
Between 28 and 32 years old	Male	Nursing	Over 48 hours	No	No, I don’t have a history of psychiatric disease.	No	Not infected.	No	No relatives infected.	No	No	No	No	Not at all.	Not at all.	Not at all.	Not at all.	Not at all.	Not at all.	Not at all.	Not at all.	Not at all.	Not at all.	Not at all.	Not at all.	Not at all.	Not at all.	Not at all.	Not at all.	Not at all.	Not at all.	Not at all.	Not at all.	Not at all.	Not at all.	Yes	Yes	No	No	No	No	No	No	No	No	Daily or almost daily	Monthly	Never	Never
Between 48 and 52 years old	Female	Nursing	Up to 24 hours	No	No, I don’t have a history of psychiatric disease.	Yes	Outpatient.	No	No relatives infected.	No	Yes	No	Yes	A little bit.	A little bit.	Not at all.	Not at all.	A little bit.	Not at all.	A little bit.	Not at all.	Not at all.	Not at all.	A little bit.	Not at all.	Not at all.	Not at all.	Not at all.	Not at all.	Not at all.	Not at all.	Not at all.	Not at all.	A little bit.	A little bit.	No	Yes	No	No	No	No	No	No	No	No	Never	Weekly	Never	Never
Between 33 and 37 years old	Male	Nursing	Between 24-48 hours	No	No, I don’t have a history of psychiatric disease.	No	Not infected.	No	No relatives infected.	No	Yes	No	No	Not at all.	Not at all.	Not at all.	Not at all.	Not at all.	Not at all.	Moderately.	Not at all.	Not at all.	Not at all.	A little bit.	Not at all.	Not at all.	Not at all.	Not at all.	Not at all.	Not at all.	Not at all.	Not at all.	Not at all.	Not at all.	Not at all.	No	No	No	No	No	No	No	No	No	No	Never	Never	Never	Never
Between 33 and 37 years old	Female	Nursing	Between 24-48 hours	No	No, I don’t have a history of psychiatric disease.	Yes	Outpatient.	No	No relatives infected.	Yes	Yes	No	Yes	Moderately.	Not at all.	Moderately.	Not at all.	A little bit.	A little bit.	Not at all.	A little bit.	Not at all.	Not at all.	A little bit.	A little bit.	Not at all.	Not at all.	A little bit.	Extremely.	Quite a bit.	Not at all.	A little bit.	Not at all.	A little bit.	Quite a bit.	Yes	Yes	No	No	No	No	No	No	No	No	Once or twice	Never	Never	Never
Between 48 and 52 years old	Female	Nursing	Over 48 hours	No	No, I don’t have a history of psychiatric disease.	No	Not infected.	No	No relatives infected.	No	Yes	Yes	Yes	Not at all.	A little bit.	Not at all.	Not at all.	Not at all.	Not at all.	Not at all.	Not at all.	Not at all.	Not at all.	Not at all.	Not at all.	Not at all.	Not at all.	Not at all.	Not at all.	Not at all.	Not at all.	Not at all.	Not at all.	Not at all.	Not at all.	Yes	Yes	No	No	No	No	No	No	No	No	Once or twice	Once or twice	Never	Never
Between 48 and 52 years old	Female	Nursing	Between 24-48 hours	No	No, I don’t have a history of psychiatric disease.	No	Not infected.	No	No relatives infected.	Yes	No	No	No	Not at all.	Not at all.	Not at all.	Not at all.	Not at all.	Not at all.	Not at all.	Not at all.	Not at all.	Not at all.	Not at all.	Not at all.	Not at all.	Not at all.	Not at all.	Not at all.	Not at all.	Not at all.	Not at all.	Not at all.	Not at all.	Not at all.	No	Yes	No	No	No	No	No	No	No	No	Never	Monthly	Never	Never
Between 43 and 47 years old	Male	Nursing	Over 48 hours	No	No, I don’t have a history of psychiatric disease.	No	Not infected.	No	No relatives infected.	Yes	No	No	No	Not at all.	Not at all.	Not at all.	Not at all.	Not at all.	Not at all.	Not at all.	Not at all.	Not at all.	Not at all.	A little bit.	Not at all.	Not at all.	Not at all.	Not at all.	Not at all.	Not at all.	Not at all.	Not at all.	Not at all.	Quite a bit.	Moderately.	No	No	No	No	No	No	No	No	No	No	Never	Once or twice	Never	Never
Between 38 and 42 years old	Female	Physiotherapy	Over 48 hours	No	No, I don’t have a history of psychiatric disease.	No	Not infected.	No	No relatives infected.	No	Yes	No	Yes	Quite a bit.	Moderately.	Moderately.	A little bit.	A little bit.	Quite a bit.	Quite a bit.	Moderately.	Quite a bit.	Quite a bit.	Moderately.	Quite a bit.	Not at all.	Moderately.	Quite a bit.	Quite a bit.	Quite a bit.	A little bit.	A little bit.	Moderately.	Moderately.	A little bit.	No	Yes	No	No	No	No	No	No	No	No	Never	Once or twice	Never	Never
Between 33 and 37 years old	Female	Physiotherapy	Over 48 hours	No	No, I don’t have a history of psychiatric disease.	No	Not infected.	No	No relatives infected.	Yes	Yes	No	Yes	A little bit.	Not at all.	Quite a bit.	Moderately.	Quite a bit.	A little bit.	Quite a bit.	A little bit.	Quite a bit.	A little bit.	Quite a bit.	Quite a bit.	Moderately.	A little bit.	Not at all.	Moderately.	Moderately.	A little bit.	A little bit.	Not at all.	Moderately.	A little bit.	No	Yes	No	No	No	No	No	No	No	No	Never	Once or twice	Never	Never
Between 23 and 27 years old	Male	Physiotherapy	Up to 24 hours	No	No, I don’t have a history of psychiatric disease.	No	Not infected.	No	No relatives infected.	No	No	No	No	Not at all.	Not at all.	Not at all.	Not at all.	Not at all.	Not at all.	Not at all.	Not at all.	Not at all.	Not at all.	Not at all.	Not at all.	Not at all.	Not at all.	Not at all.	Not at all.	Not at all.	Not at all.	Not at all.	Not at all.	Not at all.	A little bit.	No	Yes	No	No	No	No	No	No	No	No	Never	Once or twice	Never	Never
Between 28 and 32 years old	Female	Physiotherapy	Between 24-48 hours	No	No, I don’t have a history of psychiatric disease.	Yes	Outpatient.	No	No relatives infected.	No	No	No	Yes	Moderately.	Moderately.	Quite a bit.	Moderately.	Moderately.	Moderately.	A little bit.	A little bit.	Moderately.	Moderately.	Quite a bit.	A little bit.	A little bit.	A little bit.	Moderately.	A little bit.	A little bit.	Moderately.	Moderately.	A little bit.	Moderately.	Moderately.	No	Yes	No	No	No	No	No	No	No	No	Never	Once or twice	Never	Never
Between 23 and 27 years old	Female	Physiotherapy	Over 48 hours	No	No, I don’t have a history of psychiatric disease.	No	Not infected.	Yes	Outpatient.	No	Yes	No	Yes	A little bit.	A little bit.	Moderately.	Moderately.	Moderately.	Moderately.	Moderately.	Quite a bit.	Moderately.	Moderately.	Quite a bit.	Moderately.	A little bit.	Moderately.	A little bit.	Moderately.	Moderately.	Moderately.	A little bit.	Moderately.	Moderately.	Quite a bit.	No	Yes	No	No	No	No	No	No	No	No	Never	Once or twice	Never	Never
Between 28 and 32 years old	Female	Physiotherapy	Between 24-48 hours	No	No, I don’t have a history of psychiatric disease.	Yes	Outpatient.	Yes	Outpatient.	No	Yes	No	No	Not at all.	Not at all.	A little bit.	A little bit.	A little bit.	A little bit.	A little bit.	A little bit.	A little bit.	Not at all.	A little bit.	Not at all.	Not at all.	Not at all.	Not at all.	Not at all.	A little bit.	Not at all.	Not at all.	Not at all.	Not at all.	A little bit.	No	No	No	No	No	No	No	No	No	No	Never	Never	Never	Never
Between 33 and 37 years old	Female	Nursing	Between 24-48 hours	No	No, I don’t have a history of psychiatric disease.	Yes	Outpatient.	No	No relatives infected.	No	Yes	Yes	Yes	Not at all.	Not at all.	Not at all.	Quite a bit.	A little bit.	Not at all.	Quite a bit.	Quite a bit.	Not at all.	Quite a bit.	Not at all.	A little bit.	Not at all.	Not at all.	A little bit.	A little bit.	Not at all.	A little bit.	Not at all.	Not at all.	Not at all.	A little bit.	Yes	Yes	Yes	No		No		No	No	No	Once or twice	Weekly	Once or twice	Never
Between 28 and 32 years old	Female	Nursing	Between 24-48 hours	No	No, I don’t have a history of psychiatric disease.	Yes	ICU.	Yes	Relative perished due to COVID-19.	No	Yes	Yes	Yes	Moderately.	A little bit.	Moderately.	Moderately.	A little bit.	A little bit.	A little bit.	A little bit.	A little bit.	A little bit.	A little bit.	A little bit.	Not at all.	A little bit.	Quite a bit.	Moderately.	Quite a bit.	Quite a bit.	Quite a bit.	Quite a bit.	Quite a bit.	Moderately.	No	No	No	No	No	No	No	No	No	No	Never	Once or twice	Never	Never
Between 28 and 32 years old	Female	Nursing	Between 24-48 hours	No	No, I don’t have a history of psychiatric disease.	No	Not infected.	No	No relatives infected.	No	No	No	Yes	Moderately.	Not at all.	A little bit.	Quite a bit.	Quite a bit.	A little bit.	A little bit.	Not at all.	A little bit.	Moderately.	Moderately.	Moderately.	Moderately.	A little bit.	Not at all.	Quite a bit.	Quite a bit.	Not at all.	Moderately.	Moderately.	Quite a bit.	Quite a bit.	No	Yes	No	No	No	No	Yes	No	No	No	Never	Once or twice	Never	Never
Between 18 and 22 years old	Female	Nursing	Between 24-48 hours	No	No, I don’t have a history of psychiatric disease.	Yes	Outpatient.	No	No relatives infected.	Yes	Yes	No	No	Moderately.	Not at all.	A little bit.	A little bit.	Moderately.	A little bit.	Not at all.	Not at all.	Not at all.	A little bit.	A little bit.	A little bit.	A little bit.	Not at all.	Not at all.	Moderately.	A little bit.	A little bit.	A little bit.	Not at all.	A little bit.	A little bit.	No	Yes	No	No	No	No	No	No	No	No	Never	Monthly	Never	Never
Between 33 and 37 years old	Female	Physiotherapy	Over 48 hours	No	No, I don’t have a history of psychiatric disease.	No	Not infected.	No	No relatives infected.	Yes	Yes	No	Yes	A little bit.	Not at all.	A little bit.	Not at all.	A little bit.	A little bit.	Not at all.	A little bit.	A little bit.	Not at all.	A little bit.	Not at all.	A little bit.	A little bit.	Moderately.	A little bit.	Not at all.	Moderately.	A little bit.	A little bit.	Not at all.	Not at all.	No	No	No	No	No	No	No	No	No	No	Never	Never	Never	Never
Between 33 and 37 years old	Female	Nursing	Up to 24 hours	No	No, I don’t have a history of psychiatric disease.	Yes	Outpatient.	No	No relatives infected.	No	Yes	No	No	Not at all.	Not at all.	Not at all.	Not at all.	Not at all.	A little bit.	Not at all.	Not at all.	Not at all.	Not at all.	A little bit.	A little bit.	Not at all.	Not at all.	Not at all.	Not at all.	Not at all.	Not at all.	Not at all.	Not at all.	Not at all.	Not at all.	No	No	No	No	No	No	No	No	No	No	Never	Never	Never	Never
Between 28 and 32 years old	Male	Physiotherapy	Between 24-48 hours	No	No, I don’t have a history of psychiatric disease.	No	Not infected.	Yes	Outpatient.	No	No	No	Yes	Moderately.	Quite a bit.	Moderately.	A little bit.	Moderately.	Moderately.	Not at all.	Not at all.	A little bit.	A little bit.	A little bit.	A little bit.	Not at all.	Not at all.	Quite a bit.	A little bit.	Not at all.	Moderately.	A little bit.	Not at all.	Not at all.	Not at all.	No	No	No	No	No	No	No	No	No	No	Never	Never	Never	Never
Between 28 and 32 years old	Female	Nursing	Between 24-48 hours	No	No, I don’t have a history of psychiatric disease.	No	Not infected.	No	No relatives infected.	No	Yes	Yes	Yes	Moderately.	A little bit.	Quite a bit.	Quite a bit.	Quite a bit.	Quite a bit.	Not at all.	Quite a bit.	Quite a bit.	Quite a bit.	Quite a bit.	Quite a bit.	Quite a bit.	Quite a bit.	Moderately.	Quite a bit.	Quite a bit.	Moderately.	Moderately.	Not at all.	Quite a bit.	Quite a bit.	Yes	Yes	No	No	No	No	No	No	No	No	Daily or almost daily	Monthly	Never	Never
Between 23 and 27 years old	Female	Nursing	Between 24-48 hours	No	No, I don’t have a history of psychiatric disease.	No	Not infected.	No	No relatives infected.	Yes	Yes	No	No	A little bit.	Not at all.	A little bit.	A little bit.	Not at all.	Not at all.	Not at all.	A little bit.	A little bit.	Not at all.	Not at all.	Not at all.	Not at all.	Not at all.	Not at all.	Not at all.	Not at all.	A little bit.	A little bit.	Not at all.	Not at all.	Not at all.	No	Yes	No	No	No	No	No	No	No	No	Never	Monthly	Never	Never
Between 18 and 22 years old	Female	Nursing	Up to 24 hours	No	No, I don’t have a history of psychiatric disease.	Yes	Outpatient.	No	No relatives infected.	No	Yes	Yes	Yes	Not at all.	Not at all.	Moderately.	Moderately.	A little bit.	Not at all.	A little bit.	Not at all.	A little bit.	A little bit.	A little bit.	A little bit.	A little bit.	A little bit.	Not at all.	Moderately.	A little bit.	A little bit.	A little bit.	A little bit.	A little bit.	A little bit.	No	No	No	No	No	No	No	No	No	No	Never	Never	Never	Never
Between 28 and 32 years old	Female	Physiotherapy	Between 24-48 hours	No	No, I don’t have a history of psychiatric disease.	No	Not infected.	No	No relatives infected.	Yes	No	No	Yes	Moderately.	Not at all.	A little bit.	A little bit.	A little bit.	Moderately.	A little bit.	A little bit.	A little bit.	Moderately.	Quite a bit.	Moderately.	A little bit.	A little bit.	A little bit.	A little bit.	A little bit.	A little bit.	A little bit.	A little bit.	A little bit.	Moderately.	No	No	No	No	No	No	No	No	No	No	Never	Never	Never	Never
Between 33 and 37 years old	Male	Medicine	Over 48 hours	No	No, I don’t have a history of psychiatric disease.	No	Not infected.	No	No relatives infected.	No	No	No	Yes	Not at all.	Moderately.	Not at all.	Not at all.	Not at all.	Not at all.	Not at all.	Not at all.	Not at all.	Not at all.	Quite a bit.	Not at all.	Not at all.	Not at all.	Quite a bit.	Not at all.	Not at all.	Not at all.	Not at all.	Not at all.	Not at all.	Moderately.	Yes	Yes	No		No	No	No	No	No	No	Daily or almost daily	Daily or almost daily	Never	Never
Between 28 and 32 years old	Female	Medicine	Between 24-48 hours	Yes	Anxiety Disorder(s).	No	Not infected.	Yes	ICU.	No	Yes	No	Yes	A little bit.	A little bit.	A little bit.	A little bit.	A little bit.	A little bit.	Not at all.	A little bit.	A little bit.	A little bit.	A little bit.	A little bit.	Not at all.	Not at all.	A little bit.	A little bit.	A little bit.	A little bit.	A little bit.	A little bit.	A little bit.	A little bit.	No	Yes	No	No	No	No	No	No	No	No	Never	Daily or almost daily	Never	Never
Between 28 and 32 years old	Female	Medicine	Over 48 hours	Yes	Mood Disorder(s).	Yes	Outpatient.	Yes	Outpatient.	No	No	Yes	Yes	Moderately.	Not at all.	Quite a bit.	Extremely.	Moderately.	Quite a bit.	Quite a bit.	Not at all.	Moderately.	Quite a bit.	A little bit.	Moderately.	Moderately.	Moderately.	A little bit.	Quite a bit.	Quite a bit.	Extremely.	Quite a bit.	Not at all.	Extremely.	A little bit.	Yes	Yes	Yes	No	No	Yes	No	No	No	No	Never	Weekly	Never	Never
Between 43 and 47 years old	Female	Nursing	Between 24-48 hours	No	No, I don’t have a history of psychiatric disease.	Yes	Outpatient.	No	No relatives infected.	Yes	Yes	No	Yes	Quite a bit.	A little bit.	Quite a bit.	Quite a bit.	Quite a bit.	Quite a bit.	Quite a bit.	Quite a bit.	Quite a bit.	Moderately.	Quite a bit.	Quite a bit.	Quite a bit.	Quite a bit.	Quite a bit.	Quite a bit.	Quite a bit.	Quite a bit.	Quite a bit.	Moderately.	Quite a bit.	Quite a bit.	Yes	Yes	No	No	No	No	No	No	No	No	Once or twice	Once or twice	Never	Never
Between 33 and 37 years old	Female	Nursing	Between 24-48 hours	No	Anxiety Disorder(s).	No	Not infected.	Yes	ICU.	Yes	Yes	No	Yes	Extremely.	Quite a bit.	Quite a bit.	A little bit.	Quite a bit.	Quite a bit.	Moderately.	A little bit.	Quite a bit.	Quite a bit.	A little bit.	Moderately.	A little bit.	Quite a bit.	Moderately.	Extremely.	Quite a bit.	Quite a bit.	A little bit.	Moderately.	Quite a bit.	A little bit.	No	No	No	No	No	No	No	No	No	No	Never	Never	Never	Never
Between 18 and 22 years old	Female	Not a health care profession	Between 24-48 hours	Yes	Anxiety Disorder(s).	Yes	Outpatient.	No	No relatives infected.	No	No	No	Yes	A little bit.	Quite a bit.	A little bit.	Moderately.	Not at all.	Moderately.	Moderately.	A little bit.	Moderately.	Moderately.	Not at all.	A little bit.	A little bit.	Moderately.	Quite a bit.	Quite a bit.	Moderately.	Extremely.	Extremely.	Moderately.	Moderately.	Not at all.	Yes	Yes	No	No	No	No	No	No	No	Yes	Never	Monthly	Never	Never
Between 23 and 27 years old	Female	Not a health care profession	Between 24-48 hours	No	Anxiety Disorder(s).	Yes	Outpatient.	No	No relatives infected.	No	Yes	No	No	Moderately.	A little bit.	A little bit.	A little bit.	A little bit.	A little bit.	A little bit.	A little bit.	A little bit.	A little bit.	A little bit.	A little bit.	Not at all.	A little bit.	A little bit.	A little bit.	A little bit.	A little bit.	A little bit.	A little bit.	A little bit.	A little bit.	Yes	Yes	No	No	No	No	Yes	No	No	No	Never	Once or twice	Never	Never
Between 28 and 32 years old	Female	Physiotherapy	Between 24-48 hours	No	No, I don’t have a history of psychiatric disease.	Yes	Outpatient.	Yes	Outpatient.	No	Yes	Yes	Yes	Moderately.	A little bit.	Moderately.	Moderately.	Moderately.	Moderately.	A little bit.	A little bit.	Moderately.	A little bit.	Moderately.	A little bit.	A little bit.	Moderately.	A little bit.	A little bit.	A little bit.	A little bit.	A little bit.	A little bit.	A little bit.	Moderately.	No	Yes	No	No	No	No	No	No	No	No	Never	Weekly	Never	Never
Between 38 and 42 years old	Female	Physiotherapy	Between 24-48 hours	No	No, I don’t have a history of psychiatric disease.	No	Not infected.	No	No relatives infected.	No	Yes	Yes	Yes	A little bit.	Quite a bit.	Moderately.	Moderately.	A little bit.	Moderately.	Not at all.	Not at all.	Quite a bit.	A little bit.	A little bit.	A little bit.	A little bit.	A little bit.	A little bit.	Moderately.	A little bit.	A little bit.	Not at all.	Quite a bit.	A little bit.	Moderately.	Yes	Yes	No	No	No	No	No	No	No	No	Weekly	Weekly	Never	Never
Between 28 and 32 years old	Female	Physiotherapy	Over 48 hours	No	No, I don’t have a history of psychiatric disease.	Yes	Outpatient.	Yes	Relative perished due to COVID-19.	No	Yes	Yes	No	Not at all.	Not at all.	Not at all.	Not at all.	Not at all.	Not at all.	Not at all.	Not at all.	Not at all.	Not at all.	A little bit.	Not at all.	Not at all.	Not at all.	Not at all.	Not at all.	Not at all.	Not at all.	Not at all.	Not at all.	Not at all.	Not at all.	No	Yes	No	No	No	No	No	No	No	No	Never	Weekly	Never	Never
Between 43 and 47 years old	Female	Nursing	Between 24-48 hours	No	No, I don’t have a history of psychiatric disease.	Yes	Outpatient.	No	No relatives infected.	Yes	Yes	No	Yes	Quite a bit.	A little bit.	A little bit.	Not at all.	A little bit.	A little bit.	Not at all.	A little bit.	A little bit.	A little bit.	Quite a bit.	Moderately.	A little bit.	A little bit.	Moderately.	A little bit.	Moderately.	A little bit.	Moderately.	Moderately.	A little bit.	Quite a bit.	No	No	No	No	No	No	No	No	No	No	Never	Never	Never	Never
Between 43 and 47 years old	Female	Nursing	I had no exposition to infected patients.	No	No, I don’t have a history of psychiatric disease.	No	Not infected.	No	No relatives infected.	Yes	Yes	No	Yes	A little bit.	A little bit.	Moderately.	Not at all.	Quite a bit.	Moderately.	Moderately.	A little bit.	A little bit.	A little bit.	Extremely.	Quite a bit.	Not at all.	Not at all.	A little bit.	A little bit.	Extremely.	Not at all.	Not at all.	Not at all.	Not at all.	Not at all.	No	No	No	No	No	No	Yes	No	No	No	Never	Never	Never	Never
Between 38 and 42 years old	Female	Nursing	Up to 24 hours	No	No, I don’t have a history of psychiatric disease.	No	Not infected.	Yes	Outpatient.	No	Yes	No	No	A little bit.	Not at all.	Not at all.	A little bit.	Not at all.	Not at all.	Not at all.	Not at all.	Not at all.	Not at all.	Moderately.	Not at all.	Not at all.	Not at all.	Not at all.	Not at all.	Not at all.	Not at all.	Not at all.	Not at all.	Not at all.	Not at all.	No	Yes	No	No	No	No	No	No	No	No	Never	Weekly	Never	Never
Between 23 and 27 years old	Male	Nursing	Over 48 hours	Yes	Other.	No	Not infected.	No	No relatives infected.	Yes	No	No	Yes	A little bit.	A little bit.	A little bit.	Quite a bit.	Moderately.	Not at all.	A little bit.	Moderately.	Not at all.	Not at all.	Not at all.	Not at all.	Not at all.	Not at all.	Not at all.	A little bit.	Not at all.	A little bit.	Not at all.	Moderately.	Not at all.	Not at all.	No	No	No	No	No	No	No	No	No	No	Never	Never	Never	Never
Between 38 and 42 years old	Female	Nursing	Up to 24 hours	No	No, I don’t have a history of psychiatric disease.	No	Not infected.	No	No relatives infected.	No	Yes	No	No	Moderately.	Not at all.	A little bit.	A little bit.	A little bit.	A little bit.	A little bit.	Quite a bit.	Moderately.	A little bit.	Quite a bit.	Quite a bit.	Moderately.	A little bit.	Moderately.	Moderately.	Quite a bit.	Not at all.	A little bit.	A little bit.	Moderately.	Moderately.	No	No	No	No	No	No	No	No	No	No	Never	Never	Never	Never
Between 38 and 42 years old	Female	Nursing	Between 24-48 hours	Yes	Other.	No	Not infected.	No	No relatives infected.	Yes	Yes	No	Yes	Extremely.	Extremely.	Quite a bit.	Extremely.	Quite a bit.	Quite a bit.	Quite a bit.	Quite a bit.	Quite a bit.	Extremely.	Quite a bit.	Quite a bit.	Moderately.	Quite a bit.	Quite a bit.	Quite a bit.	Quite a bit.	Quite a bit.	Quite a bit.	Quite a bit.	Extremely.	Quite a bit.	No	Yes	No	No	No	No	No	No	No	No	Never	Once or twice	Never	Never
Between 38 and 42 years old	Female	Nursing	Between 24-48 hours	No	No, I don’t have a history of psychiatric disease.	Yes	Outpatient.	No	No relatives infected.	Yes	Yes	No	Yes	Moderately.	Quite a bit.	Quite a bit.	A little bit.	Quite a bit.	Quite a bit.	Quite a bit.	A little bit.	Not at all.	Not at all.	Not at all.	Quite a bit.	Not at all.	Not at all.	Quite a bit.	Quite a bit.	Quite a bit.	Not at all.	Not at all.	Not at all.	Not at all.	Not at all.	No	Yes	No	No	No	No	No	No	No	No	Never	Weekly	Never	Never
Between 38 and 42 years old	Female	Physiotherapy	Over 48 hours	No	No, I don’t have a history of psychiatric disease.	Yes	Outpatient.	No	No relatives infected.	No	No	No	No	A little bit.	Not at all.	Not at all.	Not at all.	A little bit.	A little bit.	A little bit.	A little bit.	Not at all.	Not at all.	A little bit.	A little bit.	A little bit.	Not at all.	A little bit.	Not at all.	A little bit.	Not at all.	Not at all.	Not at all.	Not at all.	Not at all.	No	No	No	No	No	No	No	No	No	No	Never	Never	Never	Never
Between 38 and 42 years old	Male	Physiotherapy	Between 24-48 hours	No	No, I don’t have a history of psychiatric disease.	Yes	Outpatient.	Yes	Outpatient.	Yes	Yes	No	No	Not at all.	Not at all.	Not at all.	Not at all.	Not at all.	Not at all.	Not at all.	Not at all.	Not at all.	Not at all.	Not at all.	Not at all.	Not at all.	Not at all.	Not at all.	Not at all.	Not at all.	Not at all.	Not at all.	Not at all.	Not at all.	Not at all.	Yes	Yes	Yes	No	No	No	No	No	No	No	Daily or almost daily	Weekly	Never	Never
Between 43 and 47 years old	Female	Physiotherapy	Over 48 hours	No	No, I don’t have a history of psychiatric disease.	Yes	Outpatient.	Yes	Outpatient.	No	No	No	Yes	A little bit.	Moderately.	Moderately.	A little bit.	A little bit.	A little bit.	A little bit.	A little bit.	A little bit.	Moderately.	A little bit.	Moderately.	A little bit.	A little bit.	A little bit.	Moderately.	A little bit.	A little bit.	Not at all.	Not at all.	A little bit.	A little bit.	No	Yes	No	No	No	No	No	No	No	No	Never	Once or twice	Never	Never
Between 33 and 37 years old	Female	Nursing	Between 24-48 hours	No	No, I don’t have a history of psychiatric disease.	Yes	Outpatient.	Yes	Outpatient.	No	No	No	Yes	Moderately.	A little bit.	Quite a bit.	Quite a bit.	Quite a bit.	Moderately.	Moderately.	Moderately.	Moderately.	A little bit.	Moderately.	Moderately.	A little bit.	Quite a bit.	Quite a bit.	Moderately.	Quite a bit.	Extremely.	Quite a bit.	Quite a bit.	Moderately.	Moderately.	No	No	No	No	No	No	Yes	No	No	No	Never	Monthly	Never	Never
Between 48 and 52 years old	Female	Nursing	Up to 24 hours	No	No, I don’t have a history of psychiatric disease.	No	Not infected.	Yes	Inpatient.	No	No	No	No	Moderately.	Not at all.	Moderately.	A little bit.	A little bit.	Not at all.	Moderately.	A little bit.	Not at all.	Not at all.	A little bit.	Not at all.	A little bit.	A little bit.	Not at all.	Not at all.	Not at all.	Not at all.	Not at all.	Not at all.	Not at all.	A little bit.	No	Yes	No	No	No	No	No	No	No	No	Never	Once or twice	Never	Never
Between 33 and 37 years old	Female	Nursing	Between 24-48 hours	No	No, I don’t have a history of psychiatric disease.	Yes	Outpatient.	Yes	Outpatient.	Yes	Yes	No	Yes	A little bit.	Moderately.	Quite a bit.	Moderately.	A little bit.	Moderately.	A little bit.	A little bit.	A little bit.	A little bit.	Moderately.	A little bit.	A little bit.	A little bit.	A little bit.	A little bit.	A little bit.	Moderately.	Not at all.	Not at all.	A little bit.	A little bit.	No	Yes	Yes	No	No	No	No	Yes	No	No	Never	Weekly	Once or twice	Never
Between 28 and 32 years old	Female	Physiotherapy	Between 24-48 hours	No	No, I don’t have a history of psychiatric disease.	No	Not infected.	No	No relatives infected.	Yes	No	No	Yes	Moderately.	Moderately.	Moderately.	Quite a bit.	Moderately.	Moderately.	Moderately.	Quite a bit.	Moderately.	A little bit.	Quite a bit.	Quite a bit.	A little bit.	Quite a bit.	Quite a bit.	Moderately.	Quite a bit.	Moderately.	A little bit.	A little bit.	Quite a bit.	Moderately.	No	Yes	No	No	No	No	No	No	No	No	Never	Once or twice	Never	Never
Between 33 and 37 years old	Female	Nursing	Up to 24 hours	No	No, I don’t have a history of psychiatric disease.	Yes	Outpatient.	No	No relatives infected.	Yes	Yes	No	No	Moderately.	Not at all.	A little bit.	Not at all.	Not at all.	A little bit.	Not at all.	Moderately.	Not at all.	A little bit.	Moderately.	A little bit.	A little bit.	Not at all.	Not at all.	Not at all.	Moderately.	Not at all.	Not at all.	Not at all.	Not at all.	A little bit.	No	No	No	No	No	No	No	No	No	No	Never	Never	Never	Never
Between 28 and 32 years old	Female	Physiotherapy	Between 24-48 hours	Yes	Anxiety Disorder(s).	Yes	Outpatient.	Yes	Relative perished due to COVID-19.	No	Yes	No	Yes	Quite a bit.	Quite a bit.	Moderately.	Moderately.	Quite a bit.	Moderately.	Not at all.	Moderately.	A little bit.	Moderately.	Quite a bit.	Moderately.	Not at all.	A little bit.	Moderately.	Moderately.	Not at all.	A little bit.	Moderately.	Moderately.	Moderately.	Moderately.	No	No	No	No	No	No	No	No	No	No	Never	Never	Never	Never
Between 23 and 27 years old	Male	Physiotherapy	Over 48 hours	No	No, I don’t have a history of psychiatric disease.	Yes	Outpatient.	Yes	Outpatient.	Yes	No	No	No	Not at all.	Moderately.	A little bit.	A little bit.	A little bit.	A little bit.	Not at all.	Quite a bit.	Not at all.	Not at all.	Quite a bit.	Quite a bit.	A little bit.	Not at all.	A little bit.	A little bit.	Moderately.	A little bit.	Not at all.	Not at all.	A little bit.	Quite a bit.	No	Yes	No	No	No	No	No	No	No	No	Never	Weekly	Never	Never
Between 33 and 37 years old	Female	Nursing	Between 24-48 hours	No	No, I don’t have a history of psychiatric disease.	Yes	Outpatient.	No	No relatives infected.	No	Yes	No	Yes	Moderately.	A little bit.	A little bit.	Not at all.	A little bit.	Moderately.	Not at all.	Moderately.	Not at all.	Not at all.	A little bit.	Moderately.	Not at all.	Moderately.	A little bit.	Moderately.	A little bit.	Quite a bit.	Not at all.	Quite a bit.	Moderately.	Moderately.	No	Yes	No	No	No	No	No	No	No	No	Never	Weekly	Never	Never
Between 38 and 42 years old	Female	Nursing	Over 48 hours	Yes	Anxiety Disorder(s).	Yes	Outpatient.	Yes	Outpatient.	No	Yes	No	Yes	A little bit.	Quite a bit.	Moderately.	Quite a bit.	Quite a bit.	Moderately.	A little bit.	A little bit.	A little bit.	Moderately.	Moderately.	A little bit.	Moderately.	Moderately.	Quite a bit.	Moderately.	Quite a bit.	A little bit.	Not at all.	Not at all.	A little bit.	A little bit.	No	No	No	No	No	No	Yes	No	No	No	Never	Never	Never	Never
Between 33 and 37 years old	Female	Nursing	Over 48 hours	No	No, I don’t have a history of psychiatric disease.	No	Not infected.	Yes	Relative perished due to COVID-19.	No	Yes	Yes	Yes	Extremely.	Moderately.	Moderately.	Moderately.	Moderately.	Moderately.	Moderately.	Moderately.	Moderately.	Moderately.	Moderately.	Moderately.	Moderately.	Moderately.	Moderately.	Moderately.	Moderately.	Moderately.	Moderately.	Moderately.	Moderately.	Moderately.	Yes	No	No	No	No	No	No	No	No	No	Daily or almost daily	Never	Never	Never
Between 43 and 47 years old	Female	Nursing	Between 24-48 hours	No	No, I don’t have a history of psychiatric disease.	No	Not infected.	No	No relatives infected.	Yes	No	No	No	Not at all.	Not at all.	Not at all.	Not at all.	Not at all.	Not at all.	Not at all.	Not at all.	Not at all.	Not at all.	Not at all.	Not at all.	Not at all.	Not at all.	Not at all.	Not at all.	Not at all.	Not at all.	Not at all.	Not at all.	Not at all.	Not at all.	No	No	No	No	No	No	No	No	No	No	Once or twice	Monthly	Never	Never
Between 33 and 37 years old	Female	Physiotherapy	Over 48 hours	No	No, I don’t have a history of psychiatric disease.	No	Not infected.	No	No relatives infected.	No	No	No	No	Not at all.	Not at all.	A little bit.	Not at all.	A little bit.	A little bit.	Not at all.	Moderately.	Not at all.	Not at all.	A little bit.	Not at all.	Not at all.	Not at all.	Not at all.	Not at all.	Not at all.	Not at all.	Not at all.	Not at all.	Not at all.	A little bit.	No	No	No	No	No	No	No	No	No	No	Never	Never	Never	Never
Between 28 and 32 years old	Female	Nursing	I had no exposition to infected patients.	No	No, I don’t have a history of psychiatric disease.	Yes	Outpatient.	No	No relatives infected.	Yes	No	No	Yes	A little bit.	A little bit.	A little bit.	Moderately.	A little bit.	A little bit.	A little bit.	Moderately.	Moderately.	Quite a bit.	Moderately.	Moderately.	Not at all.	Not at all.	Moderately.	Quite a bit.	Quite a bit.	A little bit.	Not at all.	A little bit.	Moderately.	Quite a bit.	No	Yes	No	No	No	No	No	No	No	No	Never	Once or twice	Never	Never
Between 38 and 42 years old	Female	Nursing	Up to 24 hours	No	No, I don’t have a history of psychiatric disease.	Yes	Outpatient.	No	No relatives infected.	Yes	Yes	No	Yes	Moderately.	A little bit.	Quite a bit.	A little bit.	A little bit.	A little bit.	Moderately.	Moderately.	A little bit.	A little bit.	Quite a bit.	Quite a bit.	Quite a bit.	A little bit.	A little bit.	A little bit.	Quite a bit.	A little bit.	A little bit.	Quite a bit.	A little bit.	Moderately.	No	No	No	No	No	No	No	No	No	No	Never	Never	Never	Never
Between 38 and 42 years old	Female	Social Services	Between 24-48 hours	No	No, I don’t have a history of psychiatric disease.	No	Not infected.	No	No relatives infected.	Yes	No	No	Yes	A little bit.	A little bit.	A little bit.	A little bit.	A little bit.	Not at all.	Not at all.	Not at all.	Not at all.	Not at all.	Not at all.	Not at all.	Not at all.	Not at all.	Not at all.	Not at all.	Not at all.	Not at all.	Not at all.	Not at all.	Not at all.	Not at all.	Yes	Yes	Yes	No	No	No	No	No	No	No	Daily or almost daily	Weekly	Monthly	Never
Between 38 and 42 years old	Female	Nursing	Up to 24 hours	No	No, I don’t have a history of psychiatric disease.	Yes	Outpatient.	No	No relatives infected.	Yes	No	No	Yes	A little bit.	Quite a bit.	Quite a bit.	Not at all.	A little bit.	A little bit.	A little bit.	Moderately.	A little bit.	A little bit.	Quite a bit.	A little bit.	Not at all.	Not at all.	Quite a bit.	Not at all.	Quite a bit.	Moderately.	Not at all.	Not at all.	Not at all.	Not at all.	No	No	No	No	No	No	No	No	No	No	Never	Never	Never	Never
Between 33 and 37 years old	Female	Not a health care profession	I had no exposition to infected patients.	No	No, I don’t have a history of psychiatric disease.	Yes	Outpatient.	Yes	Outpatient.	Yes	Yes	No	Yes	Quite a bit.	Quite a bit.	Quite a bit.	Quite a bit.	A little bit.	Quite a bit.	Quite a bit.	A little bit.	Quite a bit.	Quite a bit.	A little bit.	Quite a bit.	A little bit.	A little bit.	Quite a bit.	Quite a bit.	Quite a bit.	Quite a bit.	A little bit.	A little bit.	A little bit.	A little bit.	No	No	No	No	No	No	No	No	No	No	Never	Never	Never	Never
Between 28 and 32 years old	Female	Nutrition	Up to 24 hours	No	No, I don’t have a history of psychiatric disease.	No	Not infected.	No	No relatives infected.	No	No	No	Yes	A little bit.	Not at all.	Moderately.	A little bit.	Extremely.	Not at all.	A little bit.	Extremely.	A little bit.	A little bit.	Extremely.	A little bit.	Not at all.	A little bit.	Not at all.	Moderately.	Extremely.	A little bit.	A little bit.	Not at all.	A little bit.	Extremely.	No	Yes	No	No	No	Yes	No	No	No	No	Never	Weekly	Never	Never
Between 28 and 32 years old	Male	Medicine	Over 48 hours	No	No, I don’t have a history of psychiatric disease.	No	Not infected.	Yes	Outpatient.	No	No	No	Yes	Not at all.	Moderately.	Not at all.	Moderately.	Moderately.	Quite a bit.	A little bit.	A little bit.	Not at all.	Moderately.	Not at all.	Not at all.	Not at all.	A little bit.	A little bit.	A little bit.	Not at all.	A little bit.	Not at all.	Not at all.	Moderately.	Not at all.	No	Yes	No	No	No	No	No	No	No	No	Never	Weekly	Never	Never
Between 28 and 32 years old	Female	Not a health care profession	Up to 24 hours	No	Anxiety Disorder(s).	No	Not infected.	No	No relatives infected.	No	No	No	Yes	A little bit.	Not at all.	Quite a bit.	Moderately.	A little bit.	Not at all.	Not at all.	Not at all.	A little bit.	Quite a bit.	A little bit.	A little bit.	A little bit.	Quite a bit.	Not at all.	A little bit.	Not at all.	Not at all.	A little bit.	Not at all.	A little bit.	A little bit.	Yes	Yes	No	No	No	No	No		No	No	Daily or almost daily	Daily or almost daily	Never	Never
Between 28 and 32 years old	Female	Not a health care profession	Over 48 hours	No	No, I don’t have a history of psychiatric disease.	No	Not infected.	No	No relatives infected.	Yes	No	No	Yes	A little bit.	A little bit.	A little bit.	A little bit.	A little bit.	A little bit.	A little bit.	A little bit.	A little bit.	A little bit.	A little bit.	A little bit.	A little bit.	A little bit.	A little bit.	A little bit.	Quite a bit.	A little bit.	A little bit.	A little bit.	A little bit.	A little bit.	No	No	No	No	No	No	No	No	No	No	Never	Never	Never	Never
Between 28 and 32 years old	Female	Nursing	Up to 24 hours	No	No, I don’t have a history of psychiatric disease.	Yes	Outpatient.	No	No relatives infected.	Yes	No	No	Yes	A little bit.	A little bit.	A little bit.	A little bit.	Not at all.	A little bit.	Not at all.	A little bit.	A little bit.	A little bit.	A little bit.	Not at all.	A little bit.	Not at all.	A little bit.	A little bit.	A little bit.	Moderately.	Moderately.	Not at all.	Moderately.	A little bit.	No	No	No	No	No	No	No	No	No	No	Never	Never	Never	Never
Between 23 and 27 years old	Female	Nursing	Between 24-48 hours	Yes	Anxiety Disorder(s).	Yes	Outpatient.	No	No relatives infected.	No	Yes	Yes	Yes	A little bit.	Quite a bit.	A little bit.	A little bit.	Moderately.	A little bit.	Quite a bit.	Extremely.	Quite a bit.	Moderately.	Quite a bit.	Moderately.	Moderately.	Quite a bit.	Quite a bit.	Moderately.	Extremely.	Quite a bit.	Quite a bit.	Quite a bit.	Quite a bit.	Extremely.	No	No	No	No	No	No	No	No	No	No	Never	Once or twice	Never	Never
Between 23 and 27 years old	Female	Not a health care profession	Between 24-48 hours	No	No, I don’t have a history of psychiatric disease.	Yes	Outpatient.	No	No relatives infected.	No	Yes	No	Yes	A little bit.	Not at all.	Not at all.	Not at all.	A little bit.	A little bit.	A little bit.	A little bit.	Not at all.	A little bit.	Moderately.	A little bit.	A little bit.	A little bit.	A little bit.	Moderately.	A little bit.	A little bit.	Not at all.	Not at all.	A little bit.	A little bit.	No	Yes	No	No	No	No	No	No	No	No	Never	Weekly	Never	Never
Between 23 and 27 years old	Female	Nutrition	Over 48 hours	No	No, I don’t have a history of psychiatric disease.	Yes	Outpatient.	No	No relatives infected.	No	Yes	Yes	Yes	A little bit.	Not at all.	Moderately.	Quite a bit.	Moderately.	Quite a bit.	Extremely.	Quite a bit.	Moderately.	Moderately.	Quite a bit.	Quite a bit.	Quite a bit.	Moderately.	Moderately.	Moderately.	Moderately.	Moderately.	Moderately.	Not at all.	Moderately.	A little bit.	No	Yes	No	No	No	No	No	No	No	No	Never	Weekly	Never	Never
Between 38 and 42 years old	Female	Nursing	Up to 24 hours	No	No, I don’t have a history of psychiatric disease.	Yes	Outpatient.	Yes	Outpatient.	Yes	Yes	No	Yes	A little bit.	Moderately.	Quite a bit.	Quite a bit.	Quite a bit.	Quite a bit.	Quite a bit.	Quite a bit.	Quite a bit.	Quite a bit.	Quite a bit.	Quite a bit.	Quite a bit.	Quite a bit.	Quite a bit.	Quite a bit.	Quite a bit.	Quite a bit.	Quite a bit.	Quite a bit.	Quite a bit.	Quite a bit.	No	Yes	No	No	No	No	No	No	No	No	Never	Once or twice	Never	Never
Between 33 and 37 years old	Female	Nursing	Over 48 hours	No	No, I don’t have a history of psychiatric disease.	No	Not infected.	Yes	Relative perished due to COVID-19.	No	No	No	Yes	Quite a bit.	Quite a bit.	Quite a bit.	Moderately.	Moderately.	Moderately.	Moderately.	A little bit.	A little bit.	A little bit.	A little bit.	A little bit.	Not at all.	Not at all.	A little bit.	A little bit.	Quite a bit.	A little bit.	A little bit.	A little bit.	A little bit.	A little bit.	Yes	Yes	Yes	Yes	No	Yes	No	No	No	No	Daily or almost daily	Once or twice	Never	Never
Between 28 and 32 years old	Female	Nursing	Up to 24 hours	No	No, I don’t have a history of psychiatric disease.	No	Not infected.	Yes	Outpatient.	No	Yes	No	No	A little bit.	Not at all.	A little bit.	A little bit.	A little bit.	A little bit.	Moderately.	Not at all.	Moderately.	Moderately.	Not at all.	Not at all.	A little bit.	A little bit.	Quite a bit.	Quite a bit.	A little bit.	Quite a bit.	Moderately.	Extremely.	Extremely.	Not at all.	No	No	No	No	No	No	No	No	No	No	Never	Never	Never	Never
Between 38 and 42 years old	Female	Nursing	Up to 24 hours	No	No, I don’t have a history of psychiatric disease.	No	Not infected.	No	No relatives infected.	Yes	Yes	No	Yes	A little bit.	A little bit.	Moderately.	Moderately.	A little bit.	Moderately.	Moderately.	A little bit.	A little bit.	A little bit.	A little bit.	A little bit.	A little bit.	A little bit.	A little bit.	Moderately.	Quite a bit.	A little bit.	A little bit.	A little bit.	A little bit.	Moderately.	No	No	No	No	No	No	No	No	No	No	Never	Never	Never	Never
Between 38 and 42 years old	Female	Nursing	Up to 24 hours	Yes	Anxiety Disorder(s).	Yes	Outpatient.	No	No relatives infected.	Yes	Yes	No	Yes	A little bit.	Moderately.	A little bit.	A little bit.	A little bit.	A little bit.	Not at all.	Not at all.	A little bit.	A little bit.	Moderately.	A little bit.	Not at all.	A little bit.	A little bit.	Not at all.	A little bit.	A little bit.	Not at all.	A little bit.	A little bit.	Not at all.	No	Yes	No	No	No	No	No	No	No	No	Never	Weekly	Never	Never
Between 33 and 37 years old	Male	Nursing	Up to 24 hours	No	No, I don’t have a history of psychiatric disease.	Yes	Outpatient.	Yes	Outpatient.	No	No	No	No	Not at all.	Not at all.	Not at all.	Not at all.	Not at all.	Not at all.	Not at all.	Not at all.	Not at all.	Not at all.	Not at all.	Not at all.	Not at all.	Not at all.	Not at all.	Not at all.	Not at all.	Not at all.	Not at all.	Not at all.	Not at all.	A little bit.	No	No	No	No	No	No	No	No	No	No	Never	Never	Never	Never
Between 33 and 37 years old	Female	Nursing	Up to 24 hours	Yes	Other.	No	Not infected.	No	No relatives infected.	No	Yes	No	Yes	Moderately.	Quite a bit.	Quite a bit.	Moderately.	Moderately.	Moderately.	Moderately.	Moderately.	Moderately.	Moderately.	A little bit.	Moderately.	Moderately.	A little bit.	Quite a bit.	Moderately.	Moderately.	Quite a bit.	Quite a bit.	Moderately.	Moderately.	Quite a bit.	No	No	No	No	No	No	No	No	No	No	Never	Never	Never	Never
Between 38 and 42 years old	Male	Nursing	Up to 24 hours	No	No, I don’t have a history of psychiatric disease.	No	Not infected.	No	No relatives infected.	Yes	Yes	Yes	Yes	A little bit.	A little bit.	Quite a bit.	A little bit.	Quite a bit.	Moderately.	Not at all.	A little bit.	Quite a bit.	Quite a bit.	Quite a bit.	Quite a bit.	A little bit.	Quite a bit.	Moderately.	Quite a bit.	Quite a bit.	A little bit.	A little bit.	A little bit.	A little bit.	Quite a bit.	Yes	Yes	No	No	No	No	Yes	No	No	No	Daily or almost daily	Weekly	Never	Never
Between 28 and 32 years old	Male	Nursing	Between 24-48 hours	No	No, I don’t have a history of psychiatric disease.	Yes	Outpatient.	Yes	Outpatient.	Yes	Yes	Yes	Yes	A little bit.	Not at all.	A little bit.	Moderately.	Moderately.	Moderately.	A little bit.	A little bit.	Moderately.	A little bit.	A little bit.	A little bit.	Not at all.	A little bit.	A little bit.	Quite a bit.	Not at all.	A little bit.	Not at all.	Moderately.	A little bit.	A little bit.	No	No	No	No	No	No	No	No	No	No	Never	Never	Never	Never
Between 48 and 52 years old	Male	Medicine	Over 48 hours	Yes	Anxiety Disorder(s).	No	Not infected.	No	No relatives infected.	Yes	No	No	No	Not at all.	Not at all.	Not at all.	A little bit.	Not at all.	Not at all.	Not at all.	Not at all.	Not at all.	Not at all.	A little bit.	Not at all.	Not at all.	Not at all.	Not at all.	Not at all.	Not at all.	Not at all.	Not at all.	Not at all.	Not at all.	Not at all.	No	Yes	Yes	No	No	No	No	No	No	No	Never	Once or twice	Never	Never
Between 48 and 52 years old	Female	Nursing	Over 48 hours	Yes	Other.	Yes	Outpatient.	Yes	Outpatient.	No	Yes	No	Yes	Quite a bit.	Quite a bit.	Moderately.	A little bit.	A little bit.	Not at all.	Not at all.	Not at all.	A little bit.	A little bit.	Quite a bit.	Quite a bit.	Moderately.	Not at all.	Quite a bit.	A little bit.	A little bit.	A little bit.	Not at all.	A little bit.	A little bit.	Moderately.	Yes	No	No	No	No	No	No	No	No	No	Daily or almost daily	Never	Never	Never
Between 33 and 37 years old	Female	Nutrition	I had no exposition to infected patients.	Yes	Anxiety Disorder(s).	Yes	Outpatient.	No	No relatives infected.	No	Yes	No	Yes	Moderately.	Moderately.	Moderately.	Extremely.	Quite a bit.	Quite a bit.	A little bit.	Moderately.	A little bit.	A little bit.	A little bit.	A little bit.	A little bit.	A little bit.	Extremely.	Quite a bit.	Moderately.	Quite a bit.	Moderately.	A little bit.	Quite a bit.	Moderately.	No	Yes	No	No	No	No	Yes	No	No	No	Never	Weekly	Never	Never
Between 38 and 42 years old	Female	Not a health care profession	I had no exposition to infected patients.	No	No, I don’t have a history of psychiatric disease.	No	Not infected.	No	No relatives infected.	Yes	No	No	No	Moderately.	Not at all.	Not at all.	Not at all.	A little bit.	A little bit.	A little bit.	A little bit.	A little bit.	A little bit.	A little bit.	A little bit.	A little bit.	A little bit.	Not at all.	A little bit.	Moderately.	Not at all.	Not at all.	A little bit.	A little bit.	Quite a bit.	No	No	No	No	No	No	No	No	No	No	Never	Never	Never	Never
Between 28 and 32 years old	Female	Psychology	Over 48 hours	No	No, I don’t have a history of psychiatric disease.	No	Not infected.	No	No relatives infected.	Yes	No	No	No	Moderately.	Moderately.	Moderately.	A little bit.	Quite a bit.	Moderately.	Not at all.	Moderately.	Moderately.	Moderately.	Moderately.	Quite a bit.	Moderately.	Moderately.	A little bit.	Quite a bit.	Moderately.	A little bit.	Not at all.	Moderately.	Moderately.	A little bit.	No	Yes	No	No	No	No	No	No	Yes	No	Never	Weekly	Never	Never
Between 33 and 37 years old	Male	Not a health care profession	Between 24-48 hours	No	No, I don’t have a history of psychiatric disease.	Yes	Outpatient.	Yes	Outpatient.	No	Yes	No	No	A little bit.	Not at all.	A little bit.	Not at all.	Not at all.	Not at all.	Not at all.	Not at all.	Not at all.	Not at all.	Not at all.	Not at all.	Not at all.	Not at all.	Not at all.	Not at all.	Not at all.	Not at all.	Not at all.	Not at all.	Not at all.	Not at all.	No	Yes	No	No	No	No	No	No	No	No	Never	Once or twice	Never	Never
Between 38 and 42 years old	Female	Nursing	Up to 24 hours	No	No, I don’t have a history of psychiatric disease.	Yes	Outpatient.	No	No relatives infected.	No	Yes	No	No	Not at all.	A little bit.	Not at all.	A little bit.	A little bit.	A little bit.	Not at all.	A little bit.	A little bit.	Not at all.	A little bit.	A little bit.	A little bit.	A little bit.	A little bit.	A little bit.	A little bit.	A little bit.	Not at all.	Not at all.	A little bit.	A little bit.	No	No	No	No	No	No	No	No	No	No	Never	Never	Never	Never
Between 23 and 27 years old	Female	Not a health care profession	Between 24-48 hours	No	No, I don’t have a history of psychiatric disease.	No	Not infected.	No	No relatives infected.	Yes	No	No	Yes	A little bit.	A little bit.	Quite a bit.	A little bit.	Quite a bit.	Quite a bit.	A little bit.	A little bit.	A little bit.	Not at all.	Quite a bit.	Not at all.	Not at all.	Quite a bit.	Quite a bit.	Quite a bit.	Quite a bit.	Extremely.	Not at all.	Quite a bit.	Quite a bit.	Quite a bit.	Yes	Yes	No	No	No	No	No	No	No	No	Daily or almost daily	Monthly	Never	Never
Between 48 and 52 years old	Female	Not a health care profession	Between 24-48 hours	No	No, I don’t have a history of psychiatric disease.	No	Not infected.	No	No relatives infected.	No	No	No	No	Not at all.	Not at all.	Moderately.	Not at all.	A little bit.	Not at all.	Moderately.	A little bit.	Not at all.	A little bit.	Moderately.	Quite a bit.	Not at all.	Not at all.	Not at all.	A little bit.	A little bit.	Not at all.	Not at all.	Not at all.	Quite a bit.	Moderately.	No	No	No	No	No	No	No	No	No	No	Never	Never	Never	Never
Between 38 and 42 years old	Female	Nursing	Between 24-48 hours	No	No, I don’t have a history of psychiatric disease.	Yes	Outpatient.	No	No relatives infected.	Yes	Yes	No	No	Not at all.	Not at all.	A little bit.	A little bit.	A little bit.	Not at all.	A little bit.	A little bit.	Not at all.	Not at all.	A little bit.	Not at all.	A little bit.	Not at all.	Not at all.	Not at all.	A little bit.	Not at all.	Not at all.	Not at all.	A little bit.	A little bit.	No	No	No	No	No	No	No	No	No	No	Never	Never	Never	Never
Between 28 and 32 years old	Female	Nursing	Between 24-48 hours	No	No, I don’t have a history of psychiatric disease.	Yes	Outpatient.	No	No relatives infected.	No	Yes	No	No	Not at all.	Not at all.	A little bit.	A little bit.	Moderately.	Not at all.	Not at all.	Not at all.	A little bit.	A little bit.	Not at all.	Not at all.	Not at all.	A little bit.	Not at all.	Not at all.	Not at all.	A little bit.	Not at all.	Not at all.	A little bit.	A little bit.	Yes	Yes	No	No	No	No	No	No	No	No	Never	Once or twice	Never	Never
Between 28 and 32 years old	Male	Medicine	Over 48 hours	No	No, I don’t have a history of psychiatric disease.	No	Not infected.	No	No relatives infected.	No	No	No	Yes	Not at all.	A little bit.	Extremely.	Extremely.	Not at all.	Extremely.	Not at all.	Not at all.	Extremely.	Not at all.	A little bit.	A little bit.	Not at all.	A little bit.	Extremely.	Extremely.	Moderately.	Moderately.	Not at all.	Extremely.	Not at all.	Extremely.	No	Yes	Yes	No	Yes	No	Yes	Yes	No	No	Never	Once or twice	Never	Never
Between 28 and 32 years old	Male	Nursing	Up to 24 hours	No	No, I don’t have a history of psychiatric disease.	No	Not infected.	Yes	Outpatient.	No	Yes	Yes	Yes	A little bit.	Moderately.	Moderately.	A little bit.	A little bit.	A little bit.	A little bit.	Moderately.	A little bit.	A little bit.	A little bit.	A little bit.	A little bit.	Moderately.	Moderately.	Moderately.	A little bit.	A little bit.	A little bit.	Not at all.	A little bit.	A little bit.	Yes	Yes	No	No	No	No	Yes	No	No	No	Once or twice	Once or twice	Never	Never
Between 43 and 47 years old	Female	Medicine	Over 48 hours	No	No, I don’t have a history of psychiatric disease.	Yes	Inpatient.	No	No relatives infected.	No	Yes	No	No	Moderately.	A little bit.	A little bit.	A little bit.	A little bit.	Not at all.	Not at all.	Not at all.	Not at all.	Not at all.	Not at all.	Not at all.	Not at all.	Not at all.	A little bit.	Not at all.	Not at all.	Not at all.	Not at all.	Not at all.	Not at all.	Not at all.	No	Yes	No	No	No	No	No	No	No	No	Never	Never	Never	Never
Between 33 and 37 years old	Female	Nursing	Between 24-48 hours	No	No, I don’t have a history of psychiatric disease.	No	Not infected.	No	No relatives infected.	Yes	Yes	No	Yes	A little bit.	A little bit.	Moderately.	A little bit.	A little bit.	A little bit.	A little bit.	A little bit.	A little bit.	A little bit.	Moderately.	Moderately.	A little bit.	Moderately.	A little bit.	A little bit.	A little bit.	A little bit.	A little bit.	A little bit.	A little bit.	A little bit.	No	No	No	No	No	No	Yes	No	No	No	Never	Never	Never	Never
Between 38 and 42 years old	Female	Nursing	Between 24-48 hours	No	No, I don’t have a history of psychiatric disease.	No	Not infected.	Yes	ICU.	Yes	Yes	Yes	Yes	A little bit.	Moderately.	A little bit.	Quite a bit.	Moderately.	Quite a bit.	Not at all.	A little bit.	Quite a bit.	Moderately.	A little bit.	A little bit.	A little bit.	Quite a bit.	Extremely.	Quite a bit.	Quite a bit.	Quite a bit.	A little bit.	Moderately.	A little bit.	Quite a bit.	No	Yes	No	No	No	No	No	No	No	No	Never	Weekly	Never	Never
Between 33 and 37 years old	Female	Nursing	Up to 24 hours	No	No, I don’t have a history of psychiatric disease.	Yes	Outpatient.	Yes	ICU.	Yes	Yes	Yes	Yes	Quite a bit.	Quite a bit.	A little bit.	Extremely.	Moderately.	A little bit.	Quite a bit.	A little bit.	Quite a bit.	A little bit.	A little bit.	A little bit.	Moderately.	Moderately.	Quite a bit.	Quite a bit.	Extremely.	Extremely.	Quite a bit.	Quite a bit.	Quite a bit.	Quite a bit.	No	Yes	No	No	No	No	No	No	No	No	Never	Weekly	Never	Never
Between 33 and 37 years old	Female	Nursing	Up to 24 hours	No	No, I don’t have a history of psychiatric disease.	Yes	Outpatient.	Yes	Outpatient.	Yes	Yes	No	Yes	A little bit.	Not at all.	Not at all.	Not at all.	Moderately.	A little bit.	Extremely.	Extremely.	Not at all.	Extremely.	Not at all.	Extremely.	Not at all.	Extremely.	Extremely.	Extremely.	Extremely.	Extremely.	Extremely.	Extremely.	Extremely.	Not at all.	No	No	No	No	No	No	No	No	No	No	Never	Never	Never	Never
Between 28 and 32 years old	Female	Nursing	Between 24-48 hours	No	No, I don’t have a history of psychiatric disease.	Yes	Outpatient.	Yes	Outpatient.	No	Yes	No	Yes	Moderately.	A little bit.	A little bit.	Not at all.	A little bit.	A little bit.	A little bit.	A little bit.	A little bit.	A little bit.	Not at all.	A little bit.	A little bit.	Moderately.	Moderately.	Quite a bit.	A little bit.	Moderately.	Quite a bit.	Quite a bit.	Quite a bit.	Moderately.	Yes	Yes	No	No	No	No	No	No	No	No	Never	Weekly	Never	Never
Between 28 and 32 years old	Female	Physiotherapy	Over 48 hours	No	No, I don’t have a history of psychiatric disease.	No	Not infected.	Yes	Outpatient.	No	Yes	Yes	Yes	A little bit.	Not at all.	A little bit.	A little bit.	A little bit.	A little bit.	A little bit.	A little bit.	A little bit.	A little bit.	A little bit.	Quite a bit.	Not at all.	Not at all.	A little bit.	A little bit.	A little bit.	A little bit.	Not at all.	A little bit.	A little bit.	Quite a bit.	No	No	No	No	No	No	No	No	No	No	Never	Never	Never	Never
Between 28 and 32 years old	Female	Physiotherapy	Over 48 hours	No	No, I don’t have a history of psychiatric disease.	No	Not infected.	No	No relatives infected.	Yes	Yes	Yes	Yes	A little bit.	Not at all.	Not at all.	Moderately.	A little bit.	A little bit.	Moderately.	A little bit.	Not at all.	Not at all.	Moderately.	A little bit.	Not at all.	Not at all.	Not at all.	A little bit.	A little bit.	Moderately.	Not at all.	Not at all.	Not at all.	A little bit.	No	Yes	No	No	No	No	No	No	No	No	Never	Weekly	Never	Never
Between 28 and 32 years old	Female	Nursing	Between 24-48 hours	No	No, I don’t have a history of psychiatric disease.	No	Not infected.	No	No relatives infected.	No	Yes	No	No	Not at all.	Not at all.	Not at all.	Not at all.	Not at all.	Not at all.	Not at all.	Not at all.	Not at all.	Not at all.	Not at all.	Not at all.	Not at all.	Not at all.	Not at all.	Not at all.	Not at all.	Not at all.	Not at all.	Not at all.	Not at all.	Not at all.	No	No	No	No	No	No	No	No	No	No	Never	Never	Never	Never
Between 38 and 42 years old	Male	Physiotherapy	Over 48 hours	No	No, I don’t have a history of psychiatric disease.	Yes	Outpatient.	No	No relatives infected.	Yes	No	No	No	Not at all.	A little bit.	A little bit.	A little bit.	Moderately.	A little bit.	A little bit.	Not at all.	Not at all.	Not at all.	Moderately.	Moderately.	Quite a bit.	Not at all.	A little bit.	Not at all.	Quite a bit.	A little bit.	Not at all.	A little bit.	A little bit.	Extremely.	No	Yes	Yes	No	Yes	No	No	No	No	No	Never	Weekly	Once or twice	Never
Between 33 and 37 years old	Female	Nutrition	Up to 24 hours	No	No, I don’t have a history of psychiatric disease.	Yes	Outpatient.	No	No relatives infected.	Yes	No	No	Yes	Moderately.	A little bit.	A little bit.	A little bit.	Not at all.	Moderately.	A little bit.	Not at all.	A little bit.	A little bit.	A little bit.	Not at all.	Not at all.	A little bit.	Not at all.	A little bit.	A little bit.	Not at all.	Not at all.	A little bit.	A little bit.	Not at all.	No	Yes	No	No	No	No	No	No	No	No	Never	Weekly	Never	Never
Between 33 and 37 years old	Male	Pharmacist	I had no exposition to infected patients.	No	No, I don’t have a history of psychiatric disease.	No	Not infected.	No	No relatives infected.	No	Yes	No	Yes	A little bit.	Not at all.	A little bit.	A little bit.	A little bit.	Quite a bit.	Moderately.	Moderately.	A little bit.	A little bit.	Quite a bit.	Moderately.	A little bit.	Moderately.	Moderately.	Moderately.	A little bit.	Moderately.	Moderately.	A little bit.	Moderately.	Moderately.	No	Yes	No	No	No	No	No	No	No	No	Never	Weekly	Never	Never
Between 18 and 22 years old	Male	Pharmacist	Between 24-48 hours	No	No, I don’t have a history of psychiatric disease.	No	Not infected.	No	No relatives infected.	Yes	No	No	No	Not at all.	Not at all.	Not at all.	A little bit.	Moderately.	A little bit.	Not at all.	A little bit.	A little bit.	A little bit.	Quite a bit.	A little bit.	Not at all.	Not at all.	Not at all.	Not at all.	A little bit.	Not at all.	Not at all.	Not at all.	Not at all.	Quite a bit.	No	Yes	No	No	No	No	No	No	No	No	Never	Once or twice	Never	Never
Between 18 and 22 years old	Female	Pharmacist	Between 24-48 hours	No	No, I don’t have a history of psychiatric disease.	No	Not infected.	No	No relatives infected.	Yes	Yes	No	No	A little bit.	Not at all.	Not at all.	A little bit.	A little bit.	Not at all.	Not at all.	Not at all.	Not at all.	Not at all.	Moderately.	Not at all.	Not at all.	Not at all.	Not at all.	A little bit.	A little bit.	A little bit.	A little bit.	A little bit.	A little bit.	A little bit.	Yes	Yes	No	No	No	No	Yes	No	No	No	Never	Once or twice	Never	Never
Between 28 and 32 years old	Male	Pharmacist	Up to 24 hours	No	No, I don’t have a history of psychiatric disease.	No	Not infected.	No	No relatives infected.	Yes	Yes	Yes	Yes	Moderately.	Moderately.	Moderately.	Moderately.	Quite a bit.	Moderately.	Moderately.	Moderately.	Moderately.	Quite a bit.	Moderately.	Moderately.	Moderately.	Moderately.	Moderately.	Quite a bit.	Moderately.	Moderately.	Quite a bit.	Moderately.	Extremely.	Not at all.	No	Yes	No	No	No	No	No	No	No	No	Never	Daily or almost daily	Never	Never
Between 33 and 37 years old	Female	Pharmacist	Over 48 hours	Yes	Anxiety Disorder(s).	No	Not infected.	Yes	Outpatient.	No	Yes	No	Yes	Quite a bit.	Moderately.	Moderately.	Moderately.	Moderately.	Moderately.	Moderately.	Moderately.	Moderately.	A little bit.	Moderately.	Moderately.	A little bit.	Moderately.	Moderately.	Moderately.	Quite a bit.	Moderately.	A little bit.	A little bit.	A little bit.	A little bit.	No	Yes	No	No	No	No	Yes	No	No	No	Never	Once or twice	Never	Never
Between 33 and 37 years old	Female	Pharmacist	I had no exposition to infected patients.	No	No, I don’t have a history of psychiatric disease.	No	Not infected.	No	No relatives infected.	No	No	No	Yes	Quite a bit.	A little bit.	Quite a bit.	Moderately.	Moderately.	A little bit.	A little bit.	Quite a bit.	A little bit.	A little bit.	Quite a bit.	Moderately.	Moderately.	A little bit.	A little bit.	Moderately.	A little bit.	A little bit.	A little bit.	Not at all.	A little bit.	Moderately.	Yes	Yes	Yes	No	No	No	No	No	No	No	Never	Monthly	Never	Never
Between 28 and 32 years old	Female	Pharmacist	I had no exposition to infected patients.	No	No, I don’t have a history of psychiatric disease.	No	Not infected.	No	No relatives infected.	No	No	No	Yes	A little bit.	Not at all.	A little bit.	Not at all.	A little bit.	Moderately.	Moderately.	Moderately.	A little bit.	Quite a bit.	Moderately.	Moderately.	Quite a bit.	Quite a bit.	Not at all.	Moderately.	Quite a bit.	Moderately.	Quite a bit.	Not at all.	Extremely.	A little bit.	No	Yes	No	No	No	No	No	No	No	No	Never	Monthly	Never	Never
Between 23 and 27 years old	Female	Pharmacist	I had no exposition to infected patients.	No	No, I don’t have a history of psychiatric disease.	No	Not infected.	No	No relatives infected.	No	No	No	Yes	A little bit.	Not at all.	A little bit.	Not at all.	A little bit.	A little bit.	A little bit.	Not at all.	Not at all.	Not at all.	Not at all.	Not at all.	A little bit.	Not at all.	Not at all.	Not at all.	Not at all.	Not at all.	Not at all.	Not at all.	Not at all.	Not at all.	No	Yes	No	No	No	No	No	No	No	No	Never	Monthly	Never	Never
Between 23 and 27 years old	Female	Pharmacist	I had no exposition to infected patients.	No	No, I don’t have a history of psychiatric disease.	No	Not infected.	No	No relatives infected.	Yes	Yes	No	No	Moderately.	A little bit.	A little bit.	Not at all.	A little bit.	A little bit.	A little bit.	Moderately.	Not at all.	Not at all.	Quite a bit.	Not at all.	Not at all.	Not at all.	Not at all.	Not at all.	A little bit.	Not at all.	Not at all.	Not at all.	Not at all.	A little bit.	No	Yes	No	No	No	No	No	No	No	No	Never	Weekly	Never	Never
Between 23 and 27 years old	Male	Pharmacist	I had no exposition to infected patients.	No	No, I don’t have a history of psychiatric disease.	No	Not infected.	Yes	Outpatient.	Yes	No	No	No	Not at all.	A little bit.	Not at all.	Not at all.	A little bit.	A little bit.	Not at all.	A little bit.	A little bit.	Not at all.	A little bit.	Moderately.	Moderately.	A little bit.	Not at all.	Not at all.	Moderately.	Not at all.	Not at all.	Not at all.	A little bit.	Moderately.	No	Yes	No	No	No	Yes	No	No	No	No	Never	Weekly	Never	Never
Between 23 and 27 years old	Female	Pharmacist	Between 24-48 hours	No	No, I don’t have a history of psychiatric disease.	Yes	Outpatient.	Yes	Outpatient.	No	No	No	No	A little bit.	Not at all.	Not at all.	A little bit.	A little bit.	Not at all.	Not at all.	A little bit.	Not at all.	Not at all.	Moderately.	Not at all.	Not at all.	Not at all.	A little bit.	Not at all.	A little bit.	Not at all.	Not at all.	Not at all.	Not at all.	Not at all.	No	Yes	Yes	No	No	No	No	No	No	No	Never	Weekly	Once or twice	Never
Between 18 and 22 years old	Female	Pharmacist	I had no exposition to infected patients.	No	No, I don’t have a history of psychiatric disease.	No	Not infected.	No	No relatives infected.	No	No	No	No	Not at all.	A little bit.	A little bit.	Not at all.	Not at all.	Not at all.	A little bit.	A little bit.	Not at all.	A little bit.	Moderately.	Not at all.	Not at all.	Not at all.	Not at all.	Not at all.	Not at all.	A little bit.	Not at all.	Not at all.	Not at all.	A little bit.	No	No	No	No	No	No	No	No	No	No	Never	Never	Never	Never
Between 28 and 32 years old	Female	Pharmacist	I had no exposition to infected patients.	No	No, I don’t have a history of psychiatric disease.	No	Not infected.	No	No relatives infected.	Yes	Yes	No	Yes	Quite a bit.	A little bit.	Moderately.	A little bit.	A little bit.	Quite a bit.	Quite a bit.	Moderately.	Quite a bit.	A little bit.	A little bit.	A little bit.	A little bit.	A little bit.	A little bit.	Quite a bit.	Moderately.	A little bit.	Not at all.	A little bit.	Moderately.	A little bit.	No	Yes	No	No	No	No	No	No	No	No	Never	Once or twice	Never	Never
Between 38 and 42 years old	Male	Pharmacist	I had no exposition to infected patients.	No	No, I don’t have a history of psychiatric disease.	No	Not infected.	No	No relatives infected.	No	Yes	No	No	Not at all.	Not at all.	Not at all.	Not at all.	Not at all.	Not at all.	Not at all.	Not at all.	Not at all.	Not at all.	Not at all.	Not at all.	Not at all.	Not at all.	Not at all.	Not at all.	Not at all.	Not at all.	Not at all.	Not at all.	Not at all.	Not at all.	No	Yes	Yes	Yes	No	No	No	No	No	No	Never	Never	Never	Never
Between 28 and 32 years old	Female	Pharmacist	I had no exposition to infected patients.	No	No, I don’t have a history of psychiatric disease.	No	Not infected.	Yes	Relative perished due to COVID-19.	Yes	Yes	No	Yes	Moderately.	Moderately.	Quite a bit.	A little bit.	A little bit.	Moderately.	A little bit.	A little bit.	Not at all.	Not at all.	A little bit.	Moderately.	A little bit.	Not at all.	Quite a bit.	Moderately.	A little bit.	A little bit.	Moderately.	A little bit.	A little bit.	A little bit.	No	Yes	No	No	No	No	No	No	No	No	Never	Monthly	Never	Never
Between 33 and 37 years old	Female	Pharmacist	I had no exposition to infected patients.	No	No, I don’t have a history of psychiatric disease.	Yes	Outpatient.	No	No relatives infected.	No	No	No	Yes	Moderately.	Quite a bit.	Moderately.	A little bit.	A little bit.	Quite a bit.	Quite a bit.	Extremely.	Extremely.	Extremely.	Extremely.	Extremely.	Extremely.	Extremely.	Quite a bit.	Extremely.	Extremely.	A little bit.	Extremely.	Not at all.	Extremely.	Extremely.	Yes	No	No	No	No	No	No	No	No	No	Daily or almost daily	Never	Never	Never
Between 23 and 27 years old	Female	Pharmacist	I had no exposition to infected patients.	Yes	Anxiety Disorder(s).	No	Not infected.	No	No relatives infected.	No	Yes	No	Yes	Not at all.	Not at all.	Not at all.	Not at all.	Not at all.	Not at all.	Not at all.	Not at all.	Not at all.	Not at all.	Not at all.	Not at all.	Not at all.	Not at all.	Quite a bit.	Not at all.	A little bit.	Extremely.	Not at all.	Extremely.	Not at all.	Not at all.	No	Yes	No	No	No	No	No	No	No	No	Never	Once or twice	Never	Never
Between 28 and 32 years old	Female	Pharmacist	I had no exposition to infected patients.	No	No, I don’t have a history of psychiatric disease.	No	Not infected.	No	No relatives infected.	Yes	Yes	Yes	Yes	A little bit.	Not at all.	A little bit.	A little bit.	A little bit.	Moderately.	Not at all.	A little bit.	A little bit.	A little bit.	Quite a bit.	A little bit.	A little bit.	Not at all.	Quite a bit.	Quite a bit.	Quite a bit.	Quite a bit.	Moderately.	Quite a bit.	Quite a bit.	Quite a bit.	No	No	No	No	No	No	No	No	No	No	Never	Never	Never	Never
Between 43 and 47 years old	Female	Pharmacist	I had no exposition to infected patients.	No	No, I don’t have a history of psychiatric disease.	No	Not infected.	No	No relatives infected.	No	Yes	No	No	Not at all.	Not at all.	Not at all.	Not at all.	Moderately.	Not at all.	Not at all.	Moderately.	Not at all.	Not at all.	Moderately.	Not at all.	Not at all.	Not at all.	Not at all.	Not at all.	Not at all.	Not at all.	Not at all.	Not at all.	Not at all.	Not at all.	Yes	Yes	No	No	No	No	No	No	No	No	Never	Never	Never	Never
Between 28 and 32 years old	Female	Pharmacist	I had no exposition to infected patients.	No	No, I don’t have a history of psychiatric disease.	No	Not infected.	No	No relatives infected.	Yes	Yes	No	Yes	A little bit.	A little bit.	A little bit.	Not at all.	Not at all.	A little bit.	Not at all.	Not at all.	Not at all.	Not at all.	Not at all.	A little bit.	Not at all.	Not at all.	A little bit.	Not at all.	Not at all.	A little bit.	Not at all.	Not at all.	Not at all.	A little bit.	No	No	No	No	No	No	No	No	No	No	Never	Never	Never	Never
Between 18 and 22 years old	Female	Pharmacist	I had no exposition to infected patients.	No	No, I don’t have a history of psychiatric disease.	Yes	Outpatient.	Yes	Outpatient.	Yes	Yes	No	Yes	Moderately.	A little bit.	Quite a bit.	Extremely.	Moderately.	Moderately.	A little bit.	Extremely.	A little bit.	Moderately.	Moderately.	Not at all.	A little bit.	Not at all.	A little bit.	Not at all.	A little bit.	A little bit.	Not at all.	Not at all.	Quite a bit.	Moderately.	No	Yes	No	No	No	No	No	No	No	No	Never	Monthly	Never	Never
Between 53 and 57 years old	Female	Pharmacist	I had no exposition to infected patients.	No	No, I don’t have a history of psychiatric disease.	Yes	Outpatient.	No	No relatives infected.	No	No	No	No	A little bit.	Not at all.	A little bit.	Not at all.	A little bit.	Not at all.	A little bit.	A little bit.	A little bit.	Not at all.	Not at all.	Moderately.	Moderately.	A little bit.	Not at all.	Moderately.	Extremely.	Not at all.	Not at all.	Not at all.	Not at all.	Extremely.	Yes	No	No	No	No	No	No	No	No	No	Daily or almost daily	Once or twice	Never	Never
Between 38 and 42 years old	Female	Nursing	Up to 24 hours	No	No, I don’t have a history of psychiatric disease.	Yes	Outpatient.	Yes	Outpatient.	Yes	Yes	Yes	Yes	Moderately.	Moderately.	A little bit.	A little bit.	A little bit.	Moderately.	A little bit.	A little bit.	A little bit.	A little bit.	A little bit.	A little bit.	A little bit.	A little bit.	A little bit.	Moderately.	A little bit.	Moderately.	A little bit.	A little bit.	A little bit.	Moderately.	No	No	No	No	No	No	No	No	No	No	Never	Never	Never	Never
Between 23 and 27 years old	Female	Nursing	I had no exposition to infected patients.	No	No, I don’t have a history of psychiatric disease.	Yes	Outpatient.	Yes	Inpatient.	No	Yes	No	Yes	Moderately.	Not at all.	Moderately.	Quite a bit.	Extremely.	Moderately.	Quite a bit.	A little bit.	A little bit.	A little bit.	Extremely.	Extremely.	Moderately.	Moderately.	Not at all.	Quite a bit.	Extremely.	A little bit.	Moderately.	A little bit.	A little bit.	Extremely.	Yes	Yes	Yes	No	No	No	No	No	No	No	Never	Weekly	Never	Never
Between 33 and 37 years old	Female	Physiotherapy	Up to 24 hours	No	No, I don’t have a history of psychiatric disease.	Yes	Outpatient.	No	No relatives infected.	No	No	No	Yes	A little bit.	Not at all.	Not at all.	A little bit.	A little bit.	A little bit.	A little bit.	A little bit.	A little bit.	A little bit.	A little bit.	A little bit.	Not at all.	A little bit.	A little bit.	Moderately.	A little bit.	A little bit.	Not at all.	Not at all.	A little bit.	A little bit.	No	Yes	No	No	No	No	No	No	No	No	Never	Weekly	Never	Never
Between 23 and 27 years old	Female	Physiotherapy	Between 24-48 hours	No	No, I don’t have a history of psychiatric disease.	No	Not infected.	No	No relatives infected.	No	Yes	No	Yes	A little bit.	Not at all.	A little bit.	A little bit.	Moderately.	A little bit.	Not at all.	A little bit.	Moderately.	Not at all.	Not at all.	Not at all.	A little bit.	Not at all.	Not at all.	Not at all.	A little bit.	Moderately.	Not at all.	A little bit.	A little bit.	A little bit.	No	Yes	No	No	No	No	No	No	No	No	Never	Once or twice	Never	Never
Between 38 and 42 years old	Female	Nursing	Up to 24 hours	Yes	Anxiety Disorder(s).	No	Not infected.	No	No relatives infected.	No	Yes	No	No	Not at all.	Not at all.	Not at all.	Not at all.	Not at all.	Not at all.	A little bit.	Not at all.	Not at all.	Not at all.	Not at all.	Not at all.	A little bit.	Not at all.	Not at all.	A little bit.	Not at all.	Not at all.	A little bit.	Not at all.	Not at all.	Not at all.	Yes	Yes	Yes	No	No	No	No	No	No	No	Never	Weekly	Never	Never
Between 23 and 27 years old	Female	Physiotherapy	Between 24-48 hours	No	No, I don’t have a history of psychiatric disease.	Yes	Outpatient.	No	No relatives infected.	Yes	Yes	Yes	Yes	Moderately.	Quite a bit.	Extremely.	Extremely.	Moderately.	Extremely.	Not at all.	A little bit.	Quite a bit.	A little bit.	Moderately.	Extremely.	Not at all.	A little bit.	Quite a bit.	Quite a bit.	Quite a bit.	Moderately.	A little bit.	A little bit.	Extremely.	Extremely.	No	No	Yes	No	No	No	No	No	No	No	Never	Never	Once or twice	Never
Between 18 and 22 years old	Female	Not a health care profession	Up to 24 hours	No	No, I don’t have a history of psychiatric disease.	Yes	Outpatient.	No	No relatives infected.	Yes	Yes	No	Yes	A little bit.	A little bit.	Not at all.	Not at all.	Not at all.	A little bit.	A little bit.	A little bit.	Not at all.	Not at all.	A little bit.	A little bit.	Not at all.	Not at all.	A little bit.	Not at all.	Not at all.	A little bit.	Not at all.	A little bit.	Not at all.	A little bit.	No	No	No	No	No	No	No	No	No	No	Never	Never	Never	Never
Between 38 and 42 years old	Female	Pharmacist	Between 24-48 hours	No	No, I don’t have a history of psychiatric disease.	No	Not infected.	No	No relatives infected.	Yes	Yes	No	Yes	A little bit.	Not at all.	A little bit.	A little bit.	A little bit.	A little bit.	A little bit.	A little bit.	A little bit.	A little bit.	A little bit.	A little bit.	A little bit.	A little bit.	A little bit.	A little bit.	A little bit.	A little bit.	Moderately.	Not at all.	A little bit.	A little bit.	No	No	No	No	No	No	No	No	No	No	Never	Never	Never	Never
Between 28 and 32 years old	Female	Pharmacist	Between 24-48 hours	Yes	Anxiety Disorder(s).	No	Not infected.	No	No relatives infected.	No	Yes	No	Yes	Moderately.	Quite a bit.	Quite a bit.	Moderately.	Moderately.	Moderately.	Quite a bit.	Quite a bit.	Moderately.	Quite a bit.	Moderately.	Quite a bit.	Quite a bit.	Moderately.	Quite a bit.	Quite a bit.	Quite a bit.	Quite a bit.	Quite a bit.	Quite a bit.	Quite a bit.	Moderately.	Yes	Yes	Yes	No	Yes	Yes	Yes	No	No	No	Never	Daily or almost daily	Never	Never
Between 43 and 47 years old	Male	Not a health care profession	Up to 24 hours	No	No, I don’t have a history of psychiatric disease.	No	Not infected.	No	No relatives infected.	Yes	Yes	No	No	Not at all.	Not at all.	A little bit.	Not at all.	Not at all.	Not at all.	Not at all.	Not at all.	Not at all.	Not at all.	Not at all.	Not at all.	Not at all.	Not at all.	Not at all.	Not at all.	Not at all.	Not at all.	Not at all.	Not at all.	Not at all.	Not at all.	No	Yes	No	No	No	No	No	No	No	No	Never	Weekly	Never	Never
Between 33 and 37 years old	Male	Not a health care profession	Up to 24 hours	No	No, I don’t have a history of psychiatric disease.	No	Not infected.	Yes	ICU.	No	Yes	Yes	No	Not at all.	Quite a bit.	Moderately.	Not at all.	Moderately.	A little bit.	A little bit.	Not at all.	Quite a bit.	Moderately.	Moderately.	Not at all.	Not at all.	Not at all.	Not at all.	Not at all.	Not at all.	Not at all.	Not at all.	Not at all.	Not at all.	Not at all.	No	Yes	No	No	No	No	No	No	No	No	Monthly	Weekly	Never	Never
Between 18 and 22 years old	Male	Not a health care profession	Between 24-48 hours	No	No, I don’t have a history of psychiatric disease.	Yes	Outpatient.	No	No relatives infected.	Yes	Yes	Yes	Yes	Not at all.	Not at all.	Not at all.	A little bit.	Not at all.	Not at all.	Moderately.	Not at all.	Not at all.	Not at all.	A little bit.	Not at all.	Not at all.	Not at all.	Not at all.	Not at all.	Not at all.	Not at all.	Not at all.	Not at all.	Not at all.	Moderately.	Yes	Yes	No	No	No	No	No	No	No	No	Weekly	Weekly	Never	Never
Between 23 and 27 years old	Male	Psychology	Over 48 hours	No	No, I don’t have a history of psychiatric disease.	No	Not infected.	No	No relatives infected.	No	Yes	Yes	Yes	Moderately.	Moderately.	A little bit.	A little bit.	A little bit.	A little bit.	A little bit.	A little bit.	A little bit.	A little bit.	A little bit.	A little bit.	A little bit.	A little bit.	Moderately.	Moderately.	A little bit.	A little bit.	A little bit.	A little bit.	A little bit.	A little bit.	No	No	No	No	No	No	No	No	No	No	Never	Never	Never	Never
Between 28 and 32 years old	Female	Not a health care profession	Between 24-48 hours	No	No, I don’t have a history of psychiatric disease.	Yes	Outpatient.	Yes	Outpatient.	No	No	No	Yes	A little bit.	Quite a bit.	Moderately.	A little bit.	A little bit.	A little bit.	Not at all.	A little bit.	A little bit.	A little bit.	Moderately.	A little bit.	Not at all.	A little bit.	Quite a bit.	Moderately.	Not at all.	A little bit.	A little bit.	Not at all.	Not at all.	Not at all.	No	Yes	No	No	No	No	No	No	No	No	Never	Weekly	Never	Never
Between 43 and 47 years old	Female	Pharmacist	Over 48 hours	No	No, I don’t have a history of psychiatric disease.	No	Not infected.	No	No relatives infected.	Yes	Yes	No	No	Moderately.	Not at all.	A little bit.	A little bit.	A little bit.	A little bit.	A little bit.	A little bit.	A little bit.	Not at all.	A little bit.	A little bit.	A little bit.	Not at all.	Not at all.	Not at all.	A little bit.	A little bit.	Not at all.	Not at all.	Not at all.	Not at all.	No	Yes	No	No	No	No	No	No	No	No	Never	Once or twice	Never	Never
Between 48 and 52 years old	Male	Pharmacist	Up to 24 hours	No	No, I don’t have a history of psychiatric disease.	Yes	Outpatient.	No	No relatives infected.	Yes	Yes	No	No	Not at all.	Not at all.	A little bit.	Not at all.	Not at all.	Not at all.	Not at all.	Not at all.	Not at all.	A little bit.	A little bit.	A little bit.	A little bit.	A little bit.	Not at all.	A little bit.	A little bit.	A little bit.	A little bit.	Not at all.	A little bit.	A little bit.	No	No	No	No	No	No	No	No	No	No	Never	Once or twice	Never	Never
Between 43 and 47 years old	Male	Pharmacist	Over 48 hours	Yes	Anxiety Disorder(s).	Yes	Outpatient.	No	No relatives infected.	No	No	No	Yes	A little bit.	A little bit.	A little bit.	A little bit.	Quite a bit.	A little bit.	Quite a bit.	Quite a bit.	A little bit.	A little bit.	Quite a bit.	Quite a bit.	A little bit.	A little bit.	A little bit.	Quite a bit.	A little bit.	Moderately.	Not at all.	Not at all.	A little bit.	Not at all.	Yes	Yes	No	No	No	No	Yes	No	No	No	Never	Weekly	Never	Never
Between 33 and 37 years old	Female	Not a health care profession	Over 48 hours	Yes	Anxiety Disorder(s).	No	Not infected.	Yes	Outpatient.	Yes	Yes	No	Yes	Quite a bit.	Extremely.	Quite a bit.	Quite a bit.	Quite a bit.	Quite a bit.	Quite a bit.	A little bit.	Moderately.	Quite a bit.	Quite a bit.	Quite a bit.	Quite a bit.	Quite a bit.	Quite a bit.	Quite a bit.	Quite a bit.	Quite a bit.	Quite a bit.	A little bit.	A little bit.	A little bit.	No	Yes	No	No	No	No	Yes	No	No	No	Never	Monthly	Never	Never
Between 43 and 47 years old	Male	Physiotherapy	Between 24-48 hours	No	No, I don’t have a history of psychiatric disease.	Yes	Outpatient.	Yes	Inpatient.	Yes	Yes	No	Yes	A little bit.	A little bit.	A little bit.	Not at all.	A little bit.	A little bit.	Moderately.	A little bit.	A little bit.	A little bit.	A little bit.	A little bit.	Not at all.	Not at all.	A little bit.	A little bit.	A little bit.	A little bit.	A little bit.	Not at all.	A little bit.	A little bit.	No	No	No	No	No	No	No	No	No	No	Never	Never	Never	Never
Between 23 and 27 years old	Female	Not a health care profession	Over 48 hours	Yes	Other.	No	Not infected.	Yes	Relative perished due to COVID-19.	No	Yes	Yes	No	Extremely.	Extremely.	Extremely.	Quite a bit.	A little bit.	Quite a bit.	A little bit.	Quite a bit.	Extremely.	Quite a bit.	Extremely.	Extremely.	A little bit.	Quite a bit.	Extremely.	A little bit.	Moderately.	Extremely.	Extremely.	A little bit.	A little bit.	Extremely.	Yes	Yes	Yes	Yes	Yes	No	Yes	No	No	No	Never	Once or twice	Never	Never
Between 33 and 37 years old	Female	Pharmacist	I had no exposition to infected patients.	No	No, I don’t have a history of psychiatric disease.	No	Not infected.	Yes	Outpatient.	Yes	Yes	No	Yes	Moderately.	A little bit.	A little bit.	Moderately.	Not at all.	A little bit.	Not at all.	Not at all.	A little bit.	A little bit.	A little bit.	Not at all.	Not at all.	Not at all.	A little bit.	Not at all.	A little bit.	A little bit.	A little bit.	Not at all.	Not at all.	A little bit.	No	Yes	No	No	No	No	Yes	No	No	No	Never	Once or twice	Never	Never
Between 38 and 42 years old	Male	Nursing	Over 48 hours	No	No, I don’t have a history of psychiatric disease.	No	Not infected.	No	No relatives infected.	No	Yes	No	No	A little bit.	Not at all.	A little bit.	Not at all.	A little bit.	A little bit.	A little bit.	A little bit.	A little bit.	A little bit.	A little bit.	A little bit.	Not at all.	Not at all.	Not at all.	A little bit.	A little bit.	Not at all.	Not at all.	Not at all.	A little bit.	A little bit.	No	No	No	No	No	No	No	No	No	No	Never	Never	Never	Never
Between 23 and 27 years old	Female	Nursing	Up to 24 hours	No	No, I don’t have a history of psychiatric disease.	No	Not infected.	No	No relatives infected.	No	No	Yes	Yes	Moderately.	Not at all.	Moderately.	Moderately.	Moderately.	Quite a bit.	Not at all.	Quite a bit.	Quite a bit.	Moderately.	Quite a bit.	Quite a bit.	Moderately.	A little bit.	Not at all.	Quite a bit.	Quite a bit.	Quite a bit.	A little bit.	Quite a bit.	Moderately.	Quite a bit.	Yes	Yes	Yes	No	No	No	No	No	No	No	Never	Weekly	Never	Never
Between 33 and 37 years old	Female	Nursing	Between 24-48 hours	No	Anxiety Disorder(s).	No	Not infected.	Yes	Outpatient.	Yes	Yes	No	Yes	Not at all.	A little bit.	A little bit.	A little bit.	Moderately.	A little bit.	Not at all.	Moderately.	A little bit.	A little bit.	A little bit.	Moderately.	A little bit.	A little bit.	A little bit.	A little bit.	A little bit.	A little bit.	A little bit.	A little bit.	A little bit.	Moderately.	No	No	No	No	No	No	No	No	No	No	Never	Never	Never	Never
Between 28 and 32 years old	Female	Pharmacist	Between 24-48 hours	No	No, I don’t have a history of psychiatric disease.	Yes	Outpatient.	Yes	Outpatient.	Yes	Yes	Yes	Yes	Quite a bit.	Moderately.	Moderately.	Moderately.	Quite a bit.	Quite a bit.	Quite a bit.	Quite a bit.	Quite a bit.	Quite a bit.	Quite a bit.	Quite a bit.	Quite a bit.	Moderately.	Moderately.	Quite a bit.	Quite a bit.	Extremely.	Extremely.	Not at all.	Quite a bit.	Quite a bit.	No	No	No	No	No	No	No	No	No	No	Never	Never	Never	Never
Between 23 and 27 years old	Female	Nursing	Between 24-48 hours	Yes	Anxiety Disorder(s).	No	Not infected.	Yes	Outpatient.	No	Yes	No	Yes	A little bit.	Not at all.	A little bit.	A little bit.	A little bit.	Not at all.	A little bit.	Not at all.	Not at all.	Not at all.	A little bit.	Not at all.	A little bit.	A little bit.	Not at all.	Not at all.	A little bit.	Not at all.	Not at all.	A little bit.	Not at all.	Moderately.	No	Yes	No	No	No	No	No	No	No	No	Once or twice	Weekly	Never	Never
Between 33 and 37 years old	Female	Medicine	Over 48 hours	Yes	Mood Disorder(s).	Yes	Outpatient.	Yes	Inpatient.	Yes	No	Yes	Yes	Quite a bit.	Quite a bit.	Quite a bit.	Moderately.	Quite a bit.	Quite a bit.	Not at all.	A little bit.	Moderately.	Moderately.	Moderately.	A little bit.	Not at all.	Moderately.	Extremely.	Extremely.	Quite a bit.	Extremely.	Quite a bit.	Quite a bit.	Moderately.	A little bit.	Yes	Yes	Yes	No	Yes	Yes	Yes	Yes	No	Yes	Daily or almost daily	Daily or almost daily	Never	Never
Between 38 and 42 years old	Male	Nursing	Between 24-48 hours	No	No, I don’t have a history of psychiatric disease.	No	Not infected.	No	No relatives infected.	Yes	Yes	No	Yes	Moderately.	Quite a bit.	A little bit.	Not at all.	Not at all.	A little bit.	A little bit.	A little bit.	A little bit.	A little bit.	A little bit.	A little bit.	A little bit.	A little bit.	Extremely.	Moderately.	A little bit.	Not at all.	Not at all.	Not at all.	Quite a bit.	A little bit.	No	Yes	No	No	No	No	No	No	No	No	Never	Never	Never	Never
Between 48 and 52 years old	Female	Nursing	Between 24-48 hours	No	No, I don’t have a history of psychiatric disease.	Yes	Outpatient.	Yes	Relative perished due to COVID-19.	No	No	No	Yes	Quite a bit.	A little bit.	Quite a bit.	Not at all.	A little bit.	Quite a bit.	Quite a bit.	Not at all.	Quite a bit.	Quite a bit.	Quite a bit.	A little bit.	A little bit.	Quite a bit.	Quite a bit.	Quite a bit.	Quite a bit.	A little bit.	A little bit.	Not at all.	A little bit.	A little bit.	No	No	No	No	No	No	No	No	No	No	Never	Never	Never	Never
Between 43 and 47 years old	Female	Not a health care profession	I had no exposition to infected patients.	No	No, I don’t have a history of psychiatric disease.	No	Not infected.	No	No relatives infected.	No	No	No	No	Moderately.	A little bit.	Quite a bit.	Not at all.	Moderately.	Moderately.	Moderately.	Moderately.	A little bit.	Not at all.	Quite a bit.	Moderately.	Moderately.	Not at all.	A little bit.	Not at all.	Quite a bit.	Not at all.	Not at all.	Not at all.	A little bit.	A little bit.	Yes	Yes	No	No	No	No	No	No	No	No	Monthly	Monthly	Never	Never
Between 38 and 42 years old	Male	Not a health care profession	Between 24-48 hours	No	No, I don’t have a history of psychiatric disease.	No	Not infected.	No	No relatives infected.	No	No	No	No	Not at all.	Not at all.	Not at all.	Not at all.	Not at all.	Not at all.	Not at all.	Not at all.	Not at all.	Not at all.	Not at all.	Not at all.	Not at all.	Not at all.	Not at all.	Not at all.	Not at all.	Not at all.	Not at all.	Not at all.	Not at all.	Not at all.	No	No	No	No	No	No	No	No	No	No	Never	Never	Never	Never
Between 38 and 42 years old	Female	Not a health care profession	Between 24-48 hours	No	No, I don’t have a history of psychiatric disease.	Yes	Outpatient.	No	No relatives infected.	No	No	No	No	Quite a bit.	A little bit.	Quite a bit.	Not at all.	Quite a bit.	Quite a bit.	Quite a bit.	Quite a bit.	Quite a bit.	Quite a bit.	Quite a bit.	Quite a bit.	A little bit.	Quite a bit.	A little bit.	Quite a bit.	Quite a bit.	A little bit.	Quite a bit.	Not at all.	Not at all.	Quite a bit.	No	No	No	No	No	No	No	No	No	No	Never	Never	Never	Never
Between 38 and 42 years old	Male	Not a health care profession	Over 48 hours	No	No, I don’t have a history of psychiatric disease.	No	Not infected.	No	No relatives infected.	No	No	No	No	Not at all.	Not at all.	Not at all.	Not at all.	Not at all.	Not at all.	Not at all.	Not at all.	Not at all.	Not at all.	Not at all.	Not at all.	Not at all.	Not at all.	Not at all.	Not at all.	Not at all.	Not at all.	Not at all.	Not at all.	Not at all.	Not at all.	Yes	Yes	Yes	No	No	Yes	No	Yes	No	No	Daily or almost daily	Weekly	Never	Never
Between 23 and 27 years old	Female	Pharmacist	I had no exposition to infected patients.	No	No, I don’t have a history of psychiatric disease.	Yes	Outpatient.	Yes	Outpatient.	No	Yes	No	No	Not at all.	Not at all.	A little bit.	A little bit.	A little bit.	Not at all.	Not at all.	Not at all.	Not at all.	A little bit.	A little bit.	Not at all.	Not at all.	Not at all.	Not at all.	Not at all.	Not at all.	A little bit.	Not at all.	Not at all.	Not at all.	A little bit.	No	Yes	No	No	No	No	No	No	No	No	Never	Once or twice	Never	Never
Between 28 and 32 years old	Female	Pharmacist	I had no exposition to infected patients.	No	No, I don’t have a history of psychiatric disease.	No	Not infected.	No	No relatives infected.	No	Yes	No	Yes	A little bit.	Not at all.	Moderately.	A little bit.	A little bit.	A little bit.	A little bit.	A little bit.	A little bit.	A little bit.	A little bit.	A little bit.	Not at all.	Not at all.	Not at all.	A little bit.	A little bit.	Not at all.	Not at all.	Moderately.	Moderately.	Moderately.	Yes	Yes	No	No	No	No	No	No	No	No	Weekly	Weekly	Never	Never
Between 33 and 37 years old	Female	Pharmacist	I had no exposition to infected patients.	No	No, I don’t have a history of psychiatric disease.	Yes	Outpatient.	No	No relatives infected.	Yes	Yes	Yes	Yes	A little bit.	A little bit.	Not at all.	A little bit.	Not at all.	A little bit.	A little bit.	A little bit.	A little bit.	A little bit.	A little bit.	A little bit.	A little bit.	Not at all.	Moderately.	A little bit.	Not at all.	A little bit.	A little bit.	A little bit.	A little bit.	A little bit.	No	Yes	No	No	No	No	No	No	No	No	Never	Once or twice	Never	Never
Between 23 and 27 years old	Male	Not a health care profession	Over 48 hours	No	No, I don’t have a history of psychiatric disease.	No	Not infected.	Yes	Inpatient.	No	Yes	No	Yes	Moderately.	A little bit.	Moderately.	Quite a bit.	Quite a bit.	Quite a bit.	Quite a bit.	Quite a bit.	Quite a bit.	Quite a bit.	Extremely.	Quite a bit.	Moderately.	Quite a bit.	Moderately.	Quite a bit.	Extremely.	Quite a bit.	Extremely.	A little bit.	Moderately.	Not at all.	Yes	Yes	Yes	No	Yes	No	Yes	No	No	No	Never	Weekly	Never	Never
Between 38 and 42 years old	Male	Medicine	Up to 24 hours	No	No, I don’t have a history of psychiatric disease.	No	Not infected.	Yes	Outpatient.	Yes	Yes	No	Yes	A little bit.	Not at all.	A little bit.	A little bit.	A little bit.	Not at all.	A little bit.	A little bit.	Not at all.	A little bit.	A little bit.	A little bit.	Not at all.	A little bit.	Not at all.	Not at all.	A little bit.	Not at all.	Not at all.	Not at all.	Not at all.	A little bit.	No	Yes	No	No	No	No	No	No	No	No	Never	Once or twice	Never	Never
Between 38 and 42 years old	Male	Medicine	Up to 24 hours	No	No, I don’t have a history of psychiatric disease.	No	Not infected.	No	No relatives infected.	Yes	Yes	Yes	No	Not at all.	Not at all.	A little bit.	Not at all.	Not at all.	Not at all.	Not at all.	A little bit.	Not at all.	Not at all.	A little bit.	A little bit.	Not at all.	Not at all.	Not at all.	A little bit.	Not at all.	Not at all.	Not at all.	Not at all.	Not at all.	Not at all.	No	Yes	No	No	No	No	No	No	No	No	Never	Weekly	Never	Never
Between 33 and 37 years old	Female	Medicine	Up to 24 hours	No	No, I don’t have a history of psychiatric disease.	No	Not infected.	No	No relatives infected.	No	Yes	No	No	A little bit.	Not at all.	A little bit.	A little bit.	A little bit.	A little bit.	Not at all.	A little bit.	A little bit.	Not at all.	A little bit.	A little bit.	A little bit.	Not at all.	Not at all.	A little bit.	A little bit.	Not at all.	Not at all.	Not at all.	A little bit.	A little bit.	No	Yes	No	No	No	No	No	No	No	No	Never	Weekly	Never	Never
Between 38 and 42 years old	Male	Medicine	Up to 24 hours	No	No, I don’t have a history of psychiatric disease.	No	Not infected.	Yes	Relative perished due to COVID-19.	No	Yes	No	No	A little bit.	Not at all.	A little bit.	Not at all.	A little bit.	Not at all.	A little bit.	Not at all.	Not at all.	Not at all.	Not at all.	Not at all.	Not at all.	Not at all.	Not at all.	Not at all.	A little bit.	Not at all.	Not at all.	Not at all.	Not at all.	Not at all.	No	Yes	No	No	No	No	No	No	No	No	Never	Monthly	Never	Never
Between 43 and 47 years old	Female	Social Services	I had no exposition to infected patients.	No	No, I don’t have a history of psychiatric disease.	Yes	Outpatient.	No	No relatives infected.	No	Yes	No	Yes	Moderately.	A little bit.	Moderately.	Moderately.	Moderately.	A little bit.	A little bit.	Moderately.	Moderately.	A little bit.	A little bit.	Moderately.	A little bit.	A little bit.	A little bit.	Moderately.	Quite a bit.	A little bit.	Moderately.	Not at all.	A little bit.	Not at all.	No	Yes	No	No	No	No	No	No	No	No	Never	Once or twice	Never	Never
Between 38 and 42 years old	Male	Medicine	Over 48 hours	Yes	Anxiety Disorder(s).	Yes	Outpatient.	Yes	Outpatient.	Yes	No	Yes	Yes	Quite a bit.	A little bit.	Moderately.	Extremely.	Moderately.	Quite a bit.	A little bit.	Not at all.	A little bit.	Moderately.	Moderately.	A little bit.	A little bit.	Not at all.	A little bit.	A little bit.	Not at all.	A little bit.	A little bit.	A little bit.	Moderately.	Not at all.	No	Yes	Yes	No	Yes	Yes	Yes	No	Yes	No	Never	Weekly	Once or twice	Never
Between 38 and 42 years old	Female	Medicine	Over 48 hours	Yes	Mood Disorder(s).	No	Not infected.	No	No relatives infected.	Yes	Yes	No	Yes	Moderately.	Quite a bit.	Quite a bit.	Moderately.	Moderately.	Moderately.	Not at all.	Not at all.	A little bit.	A little bit.	A little bit.	Not at all.	Quite a bit.	A little bit.	Quite a bit.	Moderately.	Not at all.	Quite a bit.	Not at all.	Not at all.	A little bit.	Not at all.	Yes	No	No	No	No	No	No	No	No	No	Once or twice	Never	Never	Never
Between 33 and 37 years old	Female	Medicine	Over 48 hours	No	No, I don’t have a history of psychiatric disease.	No	Not infected.	Yes	Outpatient.	No	Yes	No	Yes	Moderately.	Quite a bit.	Moderately.	Moderately.	Moderately.	A little bit.	Not at all.	A little bit.	A little bit.	Not at all.	Moderately.	A little bit.	Not at all.	Not at all.	Quite a bit.	Quite a bit.	Not at all.	Quite a bit.	A little bit.	Not at all.	Moderately.	A little bit.	No	Yes	No	No	Yes	No	No	No	No	No	Never	Daily or almost daily	Never	Never
Between 53 and 57 years old	Female	Nursing	Between 24-48 hours	Yes	Anxiety Disorder(s).	No	Not infected.	Yes	Outpatient.	Yes	Yes	No	Yes	Extremely.	Quite a bit.	Quite a bit.	Extremely.	Extremely.	Extremely.	Extremely.	Not at all.	Not at all.	Extremely.	Not at all.	Extremely.	Extremely.	Not at all.	A little bit.	Extremely.	Extremely.	Extremely.	Quite a bit.	Quite a bit.	Extremely.	Extremely.	Yes	Yes	No	No	No	No	Yes	No	Yes	Yes	Daily or almost daily	Weekly	Never	Never
Between 38 and 42 years old	Female	Nursing	Over 48 hours	No	No, I don’t have a history of psychiatric disease.	Yes	Outpatient.	No	No relatives infected.	Yes	Yes	No	Yes	Not at all.	Not at all.	Not at all.	Not at all.	Not at all.	Not at all.	A little bit.	Not at all.	A little bit.	A little bit.	Moderately.	A little bit.	Not at all.	Not at all.	A little bit.	A little bit.	A little bit.	A little bit.	Not at all.	Not at all.	A little bit.	A little bit.	No	No	No	No	No	No	No	No	No	No	Never	Never	Never	Never
Between 23 and 27 years old	Female	Nursing	Over 48 hours	No	No, I don’t have a history of psychiatric disease.	No	Not infected.	No	No relatives infected.	Yes	Yes	Yes	Yes	Moderately.	Moderately.	Quite a bit.	A little bit.	A little bit.	A little bit.	A little bit.	Quite a bit.	Extremely.	Quite a bit.	A little bit.	Moderately.	A little bit.	A little bit.	Moderately.	Extremely.	Quite a bit.	A little bit.	Extremely.	Extremely.	Quite a bit.	Quite a bit.	Yes	Yes	Yes	No	No	No	Yes	No	No	No	Never	Once or twice	Never	Never
Between 33 and 37 years old	Female	Nursing	Up to 24 hours	No	No, I don’t have a history of psychiatric disease.	Yes	Outpatient.	No	No relatives infected.	No	Yes	No	Yes	A little bit.	Moderately.	A little bit.	A little bit.	A little bit.	A little bit.	A little bit.	A little bit.	Not at all.	A little bit.	Quite a bit.	Moderately.	Moderately.	A little bit.	Moderately.	Moderately.	Moderately.	Moderately.	A little bit.	A little bit.	A little bit.	Moderately.	No	No	No	No	No	No	No	No	No	No	Never	Monthly	Never	Never
Between 38 and 42 years old	Female	Nursing	Between 24-48 hours	No	No, I don’t have a history of psychiatric disease.	Yes	Outpatient.	No	No relatives infected.	Yes	No	No	Yes	Quite a bit.	Moderately.	Moderately.	Extremely.	Moderately.	Extremely.	Quite a bit.	Not at all.	Extremely.	Extremely.	A little bit.	Quite a bit.	Moderately.	Quite a bit.	Extremely.	Extremely.	Extremely.	Extremely.	Extremely.	Quite a bit.	Quite a bit.	A little bit.	No	No	No	No	No	No	No	No	No	No	Never	Monthly	Never	Never
Between 28 and 32 years old	Female	Physiotherapy	Between 24-48 hours	No	No, I don’t have a history of psychiatric disease.	Yes	Outpatient.	No	No relatives infected.	No	No	No	Yes	A little bit.	Moderately.	Moderately.	A little bit.	Moderately.	A little bit.	A little bit.	A little bit.	A little bit.	A little bit.	A little bit.	A little bit.	Moderately.	A little bit.	Moderately.	A little bit.	Moderately.	Moderately.	A little bit.	A little bit.	A little bit.	A little bit.	No	Yes	No	No	No	No	No	No	No	No	Never	Once or twice	Never	Never
Between 33 and 37 years old	Female	Nursing	Up to 24 hours	No	No, I don’t have a history of psychiatric disease.	No	Not infected.	No	No relatives infected.	Yes	Yes	No	Yes	A little bit.	A little bit.	A little bit.	A little bit.	A little bit.	A little bit.	A little bit.	Moderately.	A little bit.	A little bit.	A little bit.	A little bit.	A little bit.	A little bit.	A little bit.	Not at all.	A little bit.	A little bit.	Not at all.	Not at all.	A little bit.	A little bit.	No	No	No	No	No	No	Yes	No	No	No	Never	Never	Never	Never
Between 23 and 27 years old	Female	Not a health care profession	Over 48 hours	No	Anxiety Disorder(s).	Yes	Outpatient.	No	No relatives infected.	Yes	No	Yes	Yes	A little bit.	Quite a bit.	A little bit.	A little bit.	A little bit.	A little bit.	Not at all.	A little bit.	A little bit.	A little bit.	Moderately.	A little bit.	A little bit.	Not at all.	Moderately.	A little bit.	A little bit.	Moderately.	A little bit.	Not at all.	Moderately.	A little bit.	No	No	No	No	No	No	No	No	No	No	Never	Once or twice	Never	Never
Between 23 and 27 years old	Female	Physiotherapy	Over 48 hours	No	No, I don’t have a history of psychiatric disease.	No	Not infected.	No	No relatives infected.	No	No	Yes	Yes	A little bit.	Not at all.	A little bit.	A little bit.	A little bit.	Moderately.	Not at all.	Not at all.	Not at all.	Not at all.	Moderately.	A little bit.	A little bit.	Not at all.	Not at all.	Not at all.	A little bit.	A little bit.	Not at all.	Not at all.	A little bit.	Extremely.	No	Yes	Yes	No	No	No	No	Yes	No	No	Never	Daily or almost daily	Weekly	Never
Between 43 and 47 years old	Female	Nursing	Between 24-48 hours	No	No, I don’t have a history of psychiatric disease.	Yes	Outpatient.	Yes	Outpatient.	Yes	Yes	No	No	A little bit.	Not at all.	A little bit.	A little bit.	Moderately.	A little bit.	A little bit.	Moderately.	Quite a bit.	Not at all.	A little bit.	Quite a bit.	A little bit.	Not at all.	A little bit.	Quite a bit.	Quite a bit.	Quite a bit.	Not at all.	A little bit.	A little bit.	Quite a bit.	No	No	No	No	No	No	No	No	No	No	Never	Never	Never	Never
Between 28 and 32 years old	Female	Nursing	Between 24-48 hours	No	No, I don’t have a history of psychiatric disease.	No	Not infected.	Yes	Outpatient.	No	Yes	Yes	Yes	Quite a bit.	Not at all.	Quite a bit.	Extremely.	Quite a bit.	Quite a bit.	Not at all.	Extremely.	Quite a bit.	Quite a bit.	Moderately.	Moderately.	Moderately.	Extremely.	A little bit.	Extremely.	Moderately.	Quite a bit.	Quite a bit.	Extremely.	Quite a bit.	Moderately.	No	No	No	No	No	No	No	No	No	No	Never	Never	Never	Never
Between 28 and 32 years old	Female	Nursing	Between 24-48 hours	No	No, I don’t have a history of psychiatric disease.	Yes	Outpatient.	Yes	Outpatient.	No	Yes	No	Yes	Quite a bit.	Quite a bit.	Quite a bit.	Extremely.	Extremely.	Quite a bit.	Moderately.	Quite a bit.	Quite a bit.	Quite a bit.	Quite a bit.	Quite a bit.	Quite a bit.	Moderately.	Quite a bit.	Quite a bit.	Quite a bit.	Extremely.	Moderately.	Quite a bit.	Moderately.	A little bit.	Yes	Yes	Yes	No	No	No	No	No	No	No	Once or twice	Once or twice	Never	Never
Between 33 and 37 years old	Female	Nursing	Between 24-48 hours	No	No, I don’t have a history of psychiatric disease.	No	Not infected.	Yes	Outpatient.	No	Yes	No	No	A little bit.	Not at all.	Moderately.	A little bit.	A little bit.	A little bit.	Not at all.	Not at all.	A little bit.	Not at all.	A little bit.	Not at all.	Not at all.	Not at all.	Not at all.	A little bit.	A little bit.	A little bit.	Not at all.	A little bit.	Not at all.	Not at all.	Yes	Yes	No	No	No	No	No	No	No	No	Daily or almost daily	Once or twice	Never	Never
Between 33 and 37 years old	Female	Physiotherapy	Up to 24 hours	Yes	Other.	Yes	Outpatient.	No	No relatives infected.	No	Yes	No	Yes	A little bit.	A little bit.	A little bit.	A little bit.	A little bit.	A little bit.	A little bit.	Not at all.	A little bit.	Not at all.	A little bit.	A little bit.	A little bit.	A little bit.	A little bit.	A little bit.	Extremely.	A little bit.	A little bit.	A little bit.	A little bit.	A little bit.	No	Yes	No	No	No	No	Yes	No	No	No	Never	Once or twice	Never	Never
Between 33 and 37 years old	Female	Physiotherapy	Between 24-48 hours	No	No, I don’t have a history of psychiatric disease.	Yes	Outpatient.	No	No relatives infected.	Yes	Yes	No	Yes	Quite a bit.	Moderately.	Moderately.	Extremely.	Moderately.	Moderately.	Not at all.	Quite a bit.	Quite a bit.	Moderately.	Moderately.	Moderately.	Moderately.	Moderately.	A little bit.	Quite a bit.	Quite a bit.	Moderately.	A little bit.	A little bit.	Moderately.	A little bit.	No	Yes	No	No	No	No	No	No	No	No	Never	Never	Never	Never
Between 38 and 42 years old	Female	Nursing	Between 24-48 hours	No	No, I don’t have a history of psychiatric disease.	Yes	Outpatient.	No	No relatives infected.	Yes	Yes	No	No	A little bit.	A little bit.	A little bit.	A little bit.	A little bit.	Moderately.	A little bit.	A little bit.	Moderately.	A little bit.	Quite a bit.	A little bit.	A little bit.	Moderately.	Moderately.	A little bit.	Quite a bit.	Moderately.	A little bit.	Moderately.	Moderately.	A little bit.	No	No	No	No	No	No	No	No	No	No	Never	Never	Never	Never
Between 38 and 42 years old	Female	Nursing	Between 24-48 hours	Yes	Anxiety Disorder(s).	No	Not infected.	No	No relatives infected.	No	Yes	No	No	A little bit.	A little bit.	A little bit.	A little bit.	Quite a bit.	A little bit.	Not at all.	Not at all.	A little bit.	A little bit.	Quite a bit.	A little bit.	A little bit.	Not at all.	A little bit.	A little bit.	Quite a bit.	A little bit.	Not at all.	Not at all.	A little bit.	A little bit.	Yes	Yes	No	No	No	No	Yes	No	No	No	Daily or almost daily	Once or twice	Never	Never
Between 38 and 42 years old	Female	Nursing	Between 24-48 hours	No	No, I don’t have a history of psychiatric disease.	No	Not infected.	No	No relatives infected.	No	No	No	Yes	Moderately.	Quite a bit.	Moderately.	Moderately.	A little bit.	Quite a bit.	Not at all.	Not at all.	Moderately.	Quite a bit.	Extremely.	Not at all.	A little bit.	Extremely.	Quite a bit.	Extremely.	A little bit.	A little bit.	Quite a bit.	Quite a bit.	Quite a bit.	Moderately.	Yes	Yes	Yes	No	No	No	No	No	No	No	Daily or almost daily	Never	Never	Never
Between 43 and 47 years old	Female	Nursing	Up to 24 hours	No	No, I don’t have a history of psychiatric disease.	Yes	Outpatient.	Yes	Outpatient.	No	Yes	No	Yes	A little bit.	Quite a bit.	Quite a bit.	A little bit.	A little bit.	Quite a bit.	A little bit.	Moderately.	A little bit.	A little bit.	Moderately.	A little bit.	A little bit.	A little bit.	Quite a bit.	Quite a bit.	A little bit.	Quite a bit.	Moderately.	Quite a bit.	Moderately.	A little bit.	Yes	Yes	No	No	No	No	No	No	No	No	Daily or almost daily	Once or twice	Never	Never
Between 38 and 42 years old	Male	Medicine	Over 48 hours	No	No, I don’t have a history of psychiatric disease.	No	Not infected.	No	No relatives infected.	Yes	Yes	No	Yes	Quite a bit.	Moderately.	Quite a bit.	Moderately.	Quite a bit.	Moderately.	A little bit.	Not at all.	Quite a bit.	Quite a bit.	Not at all.	Not at all.	A little bit.	Not at all.	Quite a bit.	A little bit.	Not at all.	Not at all.	Moderately.	Moderately.	A little bit.	Not at all.	No	Yes	No	No	No	No	No	No	No	No	Never	Once or twice	Never	Never
Between 28 and 32 years old	Female	Nursing	Over 48 hours	No	No, I don’t have a history of psychiatric disease.	Yes	Outpatient.	No	No relatives infected.	No	Yes	No	Yes	A little bit.	Not at all.	A little bit.	Moderately.	Quite a bit.	Not at all.	A little bit.	Moderately.	Not at all.	A little bit.	Moderately.	A little bit.	Not at all.	Not at all.	Not at all.	Not at all.	A little bit.	A little bit.	Not at all.	Not at all.	A little bit.	Not at all.	No	Yes	No	No	No	No	No	No	No	No	Never	Once or twice	Never	Never
Between 23 and 27 years old	Male	Nursing	Between 24-48 hours	No	No, I don’t have a history of psychiatric disease.	Yes	Outpatient.	Yes	Outpatient.	No	No	Yes	Yes	Moderately.	Quite a bit.	Quite a bit.	Moderately.	Moderately.	Quite a bit.	Quite a bit.	A little bit.	A little bit.	Quite a bit.	Extremely.	Moderately.	A little bit.	Moderately.	Moderately.	Moderately.	Quite a bit.	Quite a bit.	Moderately.	Quite a bit.	Quite a bit.	Moderately.	No	Yes	No	No	No	No	No	No	No	No	Never	Daily or almost daily	Never	Never
Between 28 and 32 years old	Female	Nursing	Between 24-48 hours	No	No, I don’t have a history of psychiatric disease.	No	Not infected.	No	No relatives infected.	No	Yes	Yes	No	Not at all.	Not at all.	A little bit.	Not at all.	A little bit.	A little bit.	Not at all.	Not at all.	Not at all.	Not at all.	Not at all.	Not at all.	Not at all.	Not at all.	Not at all.	Not at all.	Not at all.	Not at all.	Not at all.	Not at all.	Not at all.	Not at all.	No	Yes	No	No	No	No	No	No	No	No	Never	Once or twice	Never	Never
Between 43 and 47 years old	Female	Nursing	I had no exposition to infected patients.	No	No, I don’t have a history of psychiatric disease.	No	Not infected.	No	No relatives infected.	Yes	Yes	No	Yes	A little bit.	Moderately.	A little bit.	A little bit.	A little bit.	Not at all.	Not at all.	A little bit.	Not at all.	Not at all.	A little bit.	A little bit.	Not at all.	A little bit.	A little bit.	Not at all.	A little bit.	A little bit.	Not at all.	Not at all.	Moderately.	A little bit.	No	No	No	No	No	No	No	No	No	No	Never	Never	Never	Never
Between 23 and 27 years old	Female	Nursing	Up to 24 hours	No	No, I don’t have a history of psychiatric disease.	Yes	Outpatient.	No	No relatives infected.	No	Yes	No	Yes	A little bit.	Not at all.	A little bit.	A little bit.	A little bit.	A little bit.	A little bit.	Not at all.	Not at all.	Not at all.	A little bit.	Not at all.	Not at all.	Not at all.	Not at all.	Not at all.	Not at all.	Not at all.	Not at all.	Not at all.	Not at all.	Not at all.	No	No	No	No	No	No	No	No	No	No	Never	Once or twice	Never	Never
Between 33 and 37 years old	Female	Medicine	Over 48 hours	No	No, I don’t have a history of psychiatric disease.	No	Not infected.	No	No relatives infected.	No	Yes	No	Yes	A little bit.	Moderately.	A little bit.	Moderately.	A little bit.	Not at all.	Not at all.	A little bit.	Not at all.	Moderately.	A little bit.	Not at all.	Not at all.	Not at all.	Quite a bit.	A little bit.	Moderately.	Moderately.	Not at all.	A little bit.	A little bit.	A little bit.	No	Yes	No	No	No	No	No	No	No	No	Never	Monthly	Never	Never
Between 43 and 47 years old	Male	Nursing	Over 48 hours	No	No, I don’t have a history of psychiatric disease.	Yes	Outpatient.	Yes	Inpatient.	Yes	Yes	No	No	Not at all.	Not at all.	A little bit.	Not at all.	Moderately.	Moderately.	A little bit.	Not at all.	A little bit.	Not at all.	Not at all.	A little bit.	Not at all.	A little bit.	Not at all.	Not at all.	Not at all.	Not at all.	Not at all.	Not at all.	A little bit.	Not at all.	Yes	Yes	No	No	No	No	No	No	No	No	Monthly	Monthly	Never	Never
Between 23 and 27 years old	Female	Physiotherapy	Over 48 hours	No	No, I don’t have a history of psychiatric disease.	Yes	Outpatient.	No	No relatives infected.	Yes	No	No	Yes	A little bit.	A little bit.	A little bit.	A little bit.	A little bit.	A little bit.	A little bit.	A little bit.	A little bit.	A little bit.	A little bit.	A little bit.	Not at all.	Not at all.	A little bit.	A little bit.	A little bit.	Not at all.	Not at all.	Not at all.	A little bit.	A little bit.	Yes	Yes	Yes	No	No	No	No	No	No	No	Monthly	Monthly	Once or twice	Never
Between 18 and 22 years old	Female	Nursing	Up to 24 hours	No	No, I don’t have a history of psychiatric disease.	No	Not infected.	Yes	Outpatient.	Yes	Yes	Yes	Yes	Quite a bit.	Extremely.	Quite a bit.	Extremely.	Quite a bit.	Moderately.	A little bit.	Not at all.	Quite a bit.	Extremely.	Extremely.	A little bit.	A little bit.	Quite a bit.	Quite a bit.	Quite a bit.	Moderately.	Extremely.	Quite a bit.	Quite a bit.	Quite a bit.	A little bit.	Yes	Yes	Yes	No	No	No	No	No	No	No	Once or twice	Daily or almost daily	Once or twice	Never
Between 28 and 32 years old	Female	Nursing	Up to 24 hours	No	No, I don’t have a history of psychiatric disease.	No	Not infected.	Yes	Outpatient.	No	Yes	No	Yes	Extremely.	A little bit.	Extremely.	A little bit.	Extremely.	Quite a bit.	A little bit.	A little bit.	A little bit.	A little bit.	A little bit.	A little bit.	Moderately.	Not at all.	A little bit.	Extremely.	Quite a bit.	Quite a bit.	Not at all.	Not at all.	Not at all.	Not at all.	No	Yes	No	No	No	No	No	No	No	No	Never	Monthly	Never	Never
Between 48 and 52 years old	Female	Nursing	Between 24-48 hours	No	No, I don’t have a history of psychiatric disease.	No	Not infected.	Yes	Outpatient.	Yes	Yes	No	Yes	Extremely.	Extremely.	Extremely.	Quite a bit.	A little bit.	Quite a bit.	Quite a bit.	Not at all.	Quite a bit.	Extremely.	Not at all.	Not at all.	Not at all.	Extremely.	Extremely.	Extremely.	A little bit.	Not at all.	Extremely.	Extremely.	Extremely.	Not at all.	No	Yes	No	No	No	No	No	No	No	No	Never	Weekly	Never	Never
Between 28 and 32 years old	Female	Nursing	Up to 24 hours	No	No, I don’t have a history of psychiatric disease.	Yes	Outpatient.	No	No relatives infected.	No	Yes	Yes	Yes	Moderately.	Quite a bit.	Moderately.	Quite a bit.	Moderately.	Moderately.	Moderately.	Moderately.	Moderately.	Moderately.	A little bit.	A little bit.	Not at all.	A little bit.	Quite a bit.	Moderately.	Moderately.	Moderately.	A little bit.	Moderately.	Quite a bit.	Moderately.	No	No	No	No	No	No	No	No	No	No	Never	Monthly	Never	Never
Between 33 and 37 years old	Female	Medicine	Over 48 hours	No	No, I don’t have a history of psychiatric disease.	No	Not infected.	No	No relatives infected.	No	Yes	No	No	Moderately.	A little bit.	Not at all.	A little bit.	Not at all.	Not at all.	Not at all.	Not at all.	Not at all.	Not at all.	Not at all.	Not at all.	Not at all.	Not at all.	Not at all.	Not at all.	Not at all.	Not at all.	Not at all.	Not at all.	Not at all.	A little bit.	No	Yes	No	No	No	No	No	No	No	No	Never	Once or twice	Never	Never
Between 28 and 32 years old	Male	Medicine	Over 48 hours	No	No, I don’t have a history of psychiatric disease.	No	Not infected.	No	No relatives infected.	Yes	No	No	Yes	A little bit.	Not at all.	A little bit.	Not at all.	A little bit.	Not at all.	Not at all.	Not at all.	Not at all.	Not at all.	A little bit.	Not at all.	A little bit.	Not at all.	Not at all.	Not at all.	Not at all.	Not at all.	Not at all.	Not at all.	Not at all.	Not at all.	No	Yes	No	Yes	No	No	No	No	No	Yes	Never	Weekly	Never	Weekly
Between 38 and 42 years old	Female	Nursing	Between 24-48 hours	No	No, I don’t have a history of psychiatric disease.	No	Not infected.	No	No relatives infected.	No	Yes	No	No	A little bit.	A little bit.	Moderately.	A little bit.	Moderately.	A little bit.	Not at all.	Not at all.	A little bit.	A little bit.	Moderately.	A little bit.	Not at all.	Not at all.	A little bit.	A little bit.	A little bit.	A little bit.	Not at all.	Not at all.	Quite a bit.	Moderately.	No	No	No	No	No	No	No	No	No	No	Never	Never	Never	Never
Between 33 and 37 years old	Female	Physiotherapy	Over 48 hours	No	No, I don’t have a history of psychiatric disease.	No	Not infected.	No	No relatives infected.	Yes	No	No	Yes	A little bit.	A little bit.	A little bit.	Moderately.	A little bit.	Quite a bit.	A little bit.	Not at all.	A little bit.	A little bit.	A little bit.	A little bit.	A little bit.	A little bit.	Not at all.	Moderately.	A little bit.	A little bit.	Not at all.	Not at all.	A little bit.	Not at all.	No	Yes	Yes	No	No	No	No	No	No	No	Never	Weekly	Once or twice	Never
Between 43 and 47 years old	Female	Nursing	Over 48 hours	No	No, I don’t have a history of psychiatric disease.	No	Not infected.	No	No relatives infected.	No	Yes	No	Yes	A little bit.	Not at all.	Quite a bit.	A little bit.	A little bit.	Moderately.	A little bit.	Moderately.	A little bit.	A little bit.	Moderately.	A little bit.	Moderately.	A little bit.	Moderately.	Moderately.	Quite a bit.	Not at all.	A little bit.	Not at all.	Moderately.	Moderately.	Yes	Yes	No	No	No	No	No	No	No	No	Never	Once or twice	Never	Never
Between 33 and 37 years old	Male	Nursing	Over 48 hours	No	No, I don’t have a history of psychiatric disease.	Yes	Not infected.	Yes	Inpatient.	Yes	Yes	Yes	Yes	Quite a bit.	Quite a bit.	Quite a bit.	Extremely.	Quite a bit.	Quite a bit.	Moderately.	A little bit.	A little bit.	Quite a bit.	Extremely.	Quite a bit.	Quite a bit.	Moderately.	Extremely.	Extremely.	Extremely.	Extremely.	Extremely.	Extremely.	Extremely.	Extremely.	No	No	No	No	No	No	No	No	No	No	Never	Never	Never	Never
Between 38 and 42 years old	Female	Nursing	Up to 24 hours	No	No, I don’t have a history of psychiatric disease.	Yes	Inpatient.	No	No relatives infected.	No	Yes	No	No	Not at all.	A little bit.	A little bit.	A little bit.	Moderately.	Not at all.	Not at all.	Not at all.	Not at all.	Not at all.	A little bit.	Not at all.	Not at all.	Not at all.	Not at all.	Not at all.	Moderately.	Not at all.	Not at all.	Not at all.	Not at all.	Not at all.	No	Yes	No	No	No	No	No	No	No	No	Never	Once or twice	Never	Never
Between 18 and 22 years old	Female	Nursing	Between 24-48 hours	No	No, I don’t have a history of psychiatric disease.	Yes	Outpatient.	Yes	Outpatient.	No	Yes	No	No	A little bit.	Not at all.	A little bit.	Not at all.	Not at all.	Not at all.	Not at all.	A little bit.	A little bit.	Not at all.	A little bit.	Not at all.	Not at all.	Not at all.	Not at all.	Not at all.	Not at all.	Not at all.	Not at all.	Moderately.	Not at all.	A little bit.	No	Yes	No	No	No	No	No	No	No	No	Never	Weekly	Never	Never
Between 28 and 32 years old	Female	Nursing	Between 24-48 hours	No	No, I don’t have a history of psychiatric disease.	No	Not infected.	No	No relatives infected.	No	No	No	Yes	A little bit.	A little bit.	Quite a bit.	A little bit.	A little bit.	Moderately.	A little bit.	Moderately.	Quite a bit.	Quite a bit.	A little bit.	A little bit.	A little bit.	Extremely.	Moderately.	Moderately.	A little bit.	Quite a bit.	Quite a bit.	Quite a bit.	Quite a bit.	A little bit.	No	No	No	No	No	No	No	No	No	No	Never	Never	Never	Never
Between 18 and 22 years old	Female	Nursing	Up to 24 hours	No	No, I don’t have a history of psychiatric disease.	Yes	Outpatient.	Yes	Outpatient.	No	Yes	No	Yes	Not at all.	Moderately.	Not at all.	Not at all.	Not at all.	Not at all.	Extremely.	Not at all.	Not at all.	Not at all.	Not at all.	Moderately.	A little bit.	Not at all.	Not at all.	Not at all.	A little bit.	Extremely.	Not at all.	Not at all.	Not at all.	Not at all.	No	Yes	No	No	No	No	No	No	No	No	Never	Never	Never	Never
Between 23 and 27 years old	Male	Nursing	Between 24-48 hours	No	No, I don’t have a history of psychiatric disease.	Yes	Outpatient.	No	No relatives infected.	Yes	Yes	No	Yes	A little bit.	A little bit.	A little bit.	A little bit.	A little bit.	A little bit.	A little bit.	Not at all.	A little bit.	A little bit.	Moderately.	A little bit.	Not at all.	Not at all.	A little bit.	A little bit.	A little bit.	Not at all.	A little bit.	A little bit.	A little bit.	Moderately.	Yes	Yes	No	No	No	No	Yes	No	No	No	Once or twice	Once or twice	Never	Never
Between 38 and 42 years old	Female	Nursing	Up to 24 hours	No	No, I don’t have a history of psychiatric disease.	Yes	Outpatient.	No	No relatives infected.	No	Yes	No	Yes	Moderately.	A little bit.	A little bit.	A little bit.	A little bit.	Moderately.	A little bit.	A little bit.	A little bit.	A little bit.	A little bit.	A little bit.	A little bit.	A little bit.	A little bit.	A little bit.	Moderately.	A little bit.	A little bit.	Not at all.	A little bit.	A little bit.	No	No	No	No	No	No	No	No	No	No	Never	Monthly	Never	Never
Between 43 and 47 years old	Female	Medicine	Over 48 hours	No	No, I don’t have a history of psychiatric disease.	Yes	Outpatient.	No	No relatives infected.	No	Yes	No	No	Not at all.	Not at all.	A little bit.	Not at all.	Quite a bit.	Not at all.	Not at all.	Quite a bit.	A little bit.	Not at all.	A little bit.	A little bit.	Not at all.	Not at all.	Not at all.	Not at all.	Not at all.	Not at all.	Not at all.	Not at all.	Not at all.	Not at all.	No	Yes	No	No	No	No	No	No	No	No	Never	Never	Never	Never
Between 28 and 32 years old	Female	Nursing	Over 48 hours	No	No, I don’t have a history of psychiatric disease.	No	Not infected.	No	No relatives infected.	No	Yes	Yes	Yes	Quite a bit.	Quite a bit.	Quite a bit.	Extremely.	Extremely.	Extremely.	Extremely.	Quite a bit.	Quite a bit.	Quite a bit.	Quite a bit.	Quite a bit.	Quite a bit.	Quite a bit.	Quite a bit.	Quite a bit.	Quite a bit.	Quite a bit.	Quite a bit.	Quite a bit.	Quite a bit.	Quite a bit.	No	Yes	No	No	No	No	No	No	No	No	Never	Weekly	Never	Never
Between 28 and 32 years old	Female	Medicine	Over 48 hours	No	No, I don’t have a history of psychiatric disease.	Yes	Outpatient.	Yes	Outpatient.	No	No	No	Yes	A little bit.	Not at all.	Quite a bit.	A little bit.	A little bit.	A little bit.	A little bit.	Quite a bit.	Not at all.	Not at all.	A little bit.	Not at all.	Not at all.	Not at all.	Not at all.	A little bit.	Not at all.	Not at all.	Not at all.	A little bit.	Not at all.	Not at all.	No	Yes	No	No	No	No	No	No	No	No	Never	Weekly	Never	Never
Between 53 and 57 years old	Male	Medicine	Between 24-48 hours	No	No, I don’t have a history of psychiatric disease.	No	Not infected.	Yes	Outpatient.	No	No	Yes	Yes	A little bit.	Quite a bit.	A little bit.	A little bit.	Moderately.	A little bit.	Not at all.	Not at all.	A little bit.	Not at all.	Moderately.	A little bit.	Not at all.	Not at all.	Quite a bit.	A little bit.	Not at all.	A little bit.	Not at all.	A little bit.	A little bit.	A little bit.	Yes	Yes	No	No	No	No	No	No	No	No	Never	Once or twice	Never	Never
Between 43 and 47 years old	Female	Nursing	Up to 24 hours	Yes	Anxiety Disorder(s).	No	Not infected.	No	No relatives infected.	No	Yes	No	No	Moderately.	A little bit.	Moderately.	A little bit.	Moderately.	A little bit.	Moderately.	Not at all.	A little bit.	A little bit.	Moderately.	Moderately.	A little bit.	Not at all.	A little bit.	A little bit.	A little bit.	Moderately.	A little bit.	Not at all.	Moderately.	Moderately.	Yes	Yes	No	No	No	No	No	No	No	No	Daily or almost daily	Once or twice	Never	Never
Between 38 and 42 years old	Male	Medicine	Between 24-48 hours	Yes	Anxiety Disorder(s).	Yes	Outpatient.	No	No relatives infected.	No	No	No	No	Not at all.	Not at all.	Not at all.	Not at all.	Not at all.	Not at all.	Not at all.	Not at all.	Not at all.	Not at all.	Not at all.	Not at all.	Not at all.	Not at all.	Not at all.	Not at all.	Not at all.	Not at all.	Not at all.	Not at all.	Not at all.	Not at all.	No	No	No	No	No	No	No	No	No	No	Never	Never	Never	Never
Between 28 and 32 years old	Male	Medicine	Over 48 hours	No	No, I don’t have a history of psychiatric disease.	Yes	Outpatient.	Yes	Outpatient.	No	No	Yes	Yes	A little bit.	Not at all.	A little bit.	A little bit.	A little bit.	Not at all.	A little bit.	Not at all.	Not at all.	Not at all.	A little bit.	Not at all.	Not at all.	Not at all.	Not at all.	Not at all.	A little bit.	Not at all.	Not at all.	Not at all.	Not at all.	Not at all.	No	Yes	No	No	No	No	No	No	No	No	Never	Weekly	Never	Never
Between 38 and 42 years old	Male	Medicine	Over 48 hours	No	No, I don’t have a history of psychiatric disease.	Yes	Inpatient.	Yes	Outpatient.	No	Yes	No	Yes	Quite a bit.	Quite a bit.	Quite a bit.	Quite a bit.	Quite a bit.	Quite a bit.	Moderately.	Quite a bit.	Quite a bit.	Quite a bit.	Moderately.	A little bit.	Quite a bit.	Quite a bit.	Extremely.	Extremely.	Moderately.	Extremely.	Extremely.	A little bit.	Quite a bit.	Extremely.	No	Yes	No	No	No	No	No	No	No	No	Never	Once or twice	Never	Never
Between 33 and 37 years old	Female	Nursing	Over 48 hours	No	No, I don’t have a history of psychiatric disease.	No	Not infected.	No	No relatives infected.	No	Yes	No	No	Not at all.	Not at all.	Not at all.	Not at all.	Not at all.	Not at all.	Not at all.	Not at all.	Not at all.	Not at all.	Not at all.	Not at all.	Not at all.	Not at all.	Not at all.	Not at all.	Not at all.	Not at all.	Not at all.	Not at all.	A little bit.	Not at all.	No	Yes	No	No	No	No	No	No	No	No	Never	Once or twice	Never	Never
Between 33 and 37 years old	Female	Nursing	I had no exposition to infected patients.	No	No, I don’t have a history of psychiatric disease.	Yes	Outpatient.	Yes	Outpatient.	No	Yes	Yes	Yes	Not at all.	A little bit.	A little bit.	A little bit.	Not at all.	Not at all.	A little bit.	A little bit.	A little bit.	A little bit.	A little bit.	Moderately.	Not at all.	Not at all.	A little bit.	A little bit.	A little bit.	A little bit.	Moderately.	A little bit.	A little bit.	A little bit.	No	Yes	No	No	No	No	No	No	No	No	Never	Once or twice	Never	Never
Between 28 and 32 years old	Female	Physiotherapy	Between 24-48 hours	Yes	Anxiety Disorder(s).	Yes	Outpatient.	Yes	ICU.	No	Yes	No	Yes	Quite a bit.	Quite a bit.	Quite a bit.	Quite a bit.	Extremely.	Moderately.	Moderately.	Moderately.	Moderately.	Moderately.	Quite a bit.	A little bit.	A little bit.	A little bit.	Quite a bit.	Quite a bit.	Moderately.	Moderately.	Quite a bit.	Quite a bit.	Quite a bit.	Extremely.	No	No	No	No	No	No	Yes	No	No	No	Never	Never	Never	Never
Between 43 and 47 years old	Female	Nursing	Over 48 hours	No	No, I don’t have a history of psychiatric disease.	Yes	Outpatient.	Yes	Relative perished due to COVID-19.	No	Yes	Yes	Yes	A little bit.	A little bit.	A little bit.	A little bit.	A little bit.	A little bit.	Moderately.	Moderately.	Moderately.	Quite a bit.	Moderately.	A little bit.	Not at all.	A little bit.	Quite a bit.	A little bit.	A little bit.	A little bit.	Not at all.	Quite a bit.	Moderately.	Not at all.	No	Yes	No	No	No	No	No	No	No	No	Never	Weekly	Never	Never
Between 38 and 42 years old	Female	Nursing	Between 24-48 hours	No	No, I don’t have a history of psychiatric disease.	Yes	Outpatient.	Yes	Outpatient.	No	Yes	No	Yes	Moderately.	Quite a bit.	Moderately.	Quite a bit.	A little bit.	Moderately.	Not at all.	A little bit.	Moderately.	Quite a bit.	Quite a bit.	Moderately.	A little bit.	A little bit.	Quite a bit.	A little bit.	Quite a bit.	Moderately.	Extremely.	Not at all.	Quite a bit.	A little bit.	No	Yes	No	No	No	No	No	No	No	No	Never	Weekly	Never	Never
Between 28 and 32 years old	Female	Nursing	Between 24-48 hours	No	No, I don’t have a history of psychiatric disease.	Yes	Outpatient.	No	No relatives infected.	No	No	No	Yes	Moderately.	Quite a bit.	Quite a bit.	A little bit.	A little bit.	A little bit.	A little bit.	Moderately.	Quite a bit.	Quite a bit.	A little bit.	Moderately.	Not at all.	Not at all.	A little bit.	A little bit.	A little bit.	A little bit.	A little bit.	Moderately.	Quite a bit.	Quite a bit.	No	Yes	No	No	No	No	No	No	No	No	Never	Monthly	Never	Never
Between 33 and 37 years old	Female	Nursing	Over 48 hours	No	No, I don’t have a history of psychiatric disease.	No	Not infected.	Yes	Outpatient.	No	Yes	No	Yes	Moderately.	A little bit.	Not at all.	A little bit.	A little bit.	Moderately.	A little bit.	Quite a bit.	A little bit.	Moderately.	Quite a bit.	Quite a bit.	A little bit.	A little bit.	Moderately.	A little bit.	Quite a bit.	Quite a bit.	Not at all.	Not at all.	A little bit.	A little bit.	No	Yes	No	No	No	No	Yes	No	No	No	Never	Weekly	Never	Never
Between 58 and 62 years old	Female	Nursing	I had no exposition to infected patients.	No	No, I don’t have a history of psychiatric disease.	No	Not infected.	No	No relatives infected.	No	Yes	No	No	A little bit.	Not at all.	A little bit.	Not at all.	Not at all.	Not at all.	Not at all.	Not at all.	Not at all.	A little bit.	A little bit.	A little bit.	Not at all.	Not at all.	Not at all.	A little bit.	A little bit.	Not at all.	Not at all.	Not at all.	Not at all.	Not at all.	No	No	No	No	No	No	No	No	No	No	Never	Never	Never	Never
Between 33 and 37 years old	Female	Nursing	I had no exposition to infected patients.	No	No, I don’t have a history of psychiatric disease.	Yes	Outpatient.	No	No relatives infected.	No	Yes	No	Yes	Quite a bit.	Quite a bit.	Quite a bit.	Quite a bit.	A little bit.	Quite a bit.	Not at all.	Not at all.	Quite a bit.	Moderately.	A little bit.	A little bit.	Not at all.	Moderately.	Quite a bit.	Quite a bit.	Quite a bit.	Quite a bit.	A little bit.	Quite a bit.	Quite a bit.	A little bit.	Yes	Yes	No	No	No	No	No	No	No	No	Weekly	Weekly	Never	Never
Between 43 and 47 years old	Male	Nursing	Up to 24 hours	No	No, I don’t have a history of psychiatric disease.	No	Not infected.	No	No relatives infected.	Yes	No	No	No	A little bit.	Quite a bit.	A little bit.	Quite a bit.	Quite a bit.	A little bit.	A little bit.	Not at all.	A little bit.	Moderately.	A little bit.	A little bit.	Moderately.	A little bit.	Quite a bit.	A little bit.	Quite a bit.	Moderately.	Quite a bit.	Not at all.	Quite a bit.	Not at all.	No	No	No	No	No	No	No	No	No	No	Never	Never	Never	Never
Between 33 and 37 years old	Female	Nursing	I had no exposition to infected patients.	No	No, I don’t have a history of psychiatric disease.	Yes	Not infected.	No	No relatives infected.	Yes	Yes	Yes	Yes	Moderately.	Extremely.	Extremely.	Extremely.	Extremely.	Extremely.	Quite a bit.	Extremely.	Extremely.	Quite a bit.	Quite a bit.	Quite a bit.	A little bit.	Quite a bit.	Extremely.	Extremely.	Extremely.	Extremely.	Quite a bit.	Quite a bit.	Quite a bit.	Extremely.	No	No	No	No	No	No	Yes	No	No	No	Never	Never	Never	Never
Between 38 and 42 years old	Male	Nursing	Over 48 hours	No	No, I don’t have a history of psychiatric disease.	Yes	Outpatient.	Yes	Outpatient.	Yes	Yes	No	No	A little bit.	A little bit.	A little bit.	A little bit.	A little bit.	A little bit.	Not at all.	Not at all.	A little bit.	A little bit.	Not at all.	A little bit.	Not at all.	Not at all.	A little bit.	Not at all.	A little bit.	A little bit.	Not at all.	A little bit.	Not at all.	A little bit.	No	Yes	No	No	No	No	No	No	Yes	No	Never	Monthly	Never	Never
Between 33 and 37 years old	Female	Nursing	Between 24-48 hours	No	No, I don’t have a history of psychiatric disease.	No	Not infected.	Yes	Relative perished due to COVID-19.	Yes	Yes	No	Yes	Quite a bit.	A little bit.	A little bit.	A little bit.	A little bit.	A little bit.	Not at all.	Not at all.	A little bit.	Quite a bit.	A little bit.	A little bit.	A little bit.	Quite a bit.	A little bit.	A little bit.	Not at all.	A little bit.	Not at all.	Not at all.	A little bit.	Not at all.	No	Yes	No	No	No	No	No	No	No	No	Never	Once or twice	Never	Never
Between 43 and 47 years old	Male	Nursing	Between 24-48 hours	No	No, I don’t have a history of psychiatric disease.	Yes	Outpatient.	Yes	Outpatient.	Yes	Yes	No	No	Not at all.	Not at all.	Not at all.	Not at all.	Not at all.	Not at all.	Not at all.	Not at all.	Not at all.	Not at all.	Not at all.	Not at all.	Not at all.	Not at all.	Not at all.	Not at all.	Not at all.	Not at all.	Not at all.	Not at all.	Not at all.	Not at all.	No	No	No	No	No	No	No	No	No	No	Never	Never	Never	Never
Between 38 and 42 years old	Female	Nursing	Over 48 hours	No	No, I don’t have a history of psychiatric disease.	Yes	Outpatient.	Yes	Inpatient.	No	Yes	Yes	Yes	A little bit.	Not at all.	A little bit.	Quite a bit.	Moderately.	Moderately.	Quite a bit.	Moderately.	Moderately.	Quite a bit.	A little bit.	A little bit.	Not at all.	Moderately.	A little bit.	Quite a bit.	A little bit.	Extremely.	A little bit.	Moderately.	A little bit.	Moderately.	Yes	Yes	No	No	No	No	No	No	No	No	Never	Once or twice	Never	Never
Between 28 and 32 years old	Female	Nursing	Between 24-48 hours	No	No, I don’t have a history of psychiatric disease.	Yes	Outpatient.	Yes	Outpatient.	No	Yes	Yes	Yes	Moderately.	Moderately.	A little bit.	Moderately.	Moderately.	Quite a bit.	Moderately.	Moderately.	A little bit.	A little bit.	A little bit.	A little bit.	A little bit.	A little bit.	Extremely.	Quite a bit.	Moderately.	Moderately.	A little bit.	A little bit.	Moderately.	A little bit.	No	Yes	No	No	No	No	No	No	No	No	Never	Weekly	Never	Never
Between 38 and 42 years old	Male	Nursing	Between 24-48 hours	No	No, I don’t have a history of psychiatric disease.	No	Not infected.	No	No relatives infected.	Yes	No	No	Yes	Moderately.	A little bit.	Moderately.	A little bit.	Moderately.	Moderately.	Moderately.	A little bit.	A little bit.	Moderately.	Moderately.	Moderately.	Moderately.	Moderately.	A little bit.	A little bit.	A little bit.	A little bit.	A little bit.	Not at all.	Not at all.	A little bit.	Yes	Yes	No	No	No	No	No	No	No	No	Never	Monthly	Never	Never
Between 38 and 42 years old	Female	Nursing	Over 48 hours	No	No, I don’t have a history of psychiatric disease.	No	Not infected.	Yes	Outpatient.	No	No	Yes	No	A little bit.	Not at all.	Not at all.	Not at all.	A little bit.	Moderately.	Quite a bit.	A little bit.	Not at all.	Not at all.	A little bit.	A little bit.	A little bit.	A little bit.	Not at all.	Not at all.	A little bit.	Not at all.	Not at all.	Not at all.	A little bit.	Not at all.	Yes	Yes	Yes	No	No	No	No	No	No	No	Never	Once or twice	Never	Never
Between 43 and 47 years old	Female	Nursing	Over 48 hours	No	No, I don’t have a history of psychiatric disease.	Yes	Outpatient.	No	No relatives infected.	Yes	Yes	No	Yes	Moderately.	Not at all.	Moderately.	A little bit.	A little bit.	Moderately.	A little bit.	Not at all.	Quite a bit.	Moderately.	Quite a bit.	A little bit.	Quite a bit.	Not at all.	A little bit.	A little bit.	Moderately.	Moderately.	A little bit.	A little bit.	Moderately.	A little bit.	No	Yes	No	No	No	No	No	No	No	No	Never	Once or twice	Never	Never
Between 38 and 42 years old	Female	Nursing	Up to 24 hours	No	No, I don’t have a history of psychiatric disease.	Yes	Outpatient.	No	No relatives infected.	Yes	Yes	No	Yes	Moderately.	Moderately.	Moderately.	Moderately.	Moderately.	Moderately.	Moderately.	Moderately.	Moderately.	Moderately.	Moderately.	Moderately.	Moderately.	Moderately.	Moderately.	Quite a bit.	Quite a bit.	Quite a bit.	Moderately.	Moderately.	Moderately.	Moderately.	No	No	No	No	No	No	No	No	No	No	Never	Never	Never	Never
Between 43 and 47 years old	Male	Nursing	Between 24-48 hours	No	No, I don’t have a history of psychiatric disease.	No	Not infected.	Yes	ICU.	No	Yes	Yes	Yes	A little bit.	A little bit.	Quite a bit.	Quite a bit.	Quite a bit.	Quite a bit.	Quite a bit.	Moderately.	Quite a bit.	Quite a bit.	Quite a bit.	Moderately.	A little bit.	Moderately.	A little bit.	A little bit.	Moderately.	Moderately.	Not at all.	A little bit.	Quite a bit.	A little bit.	No	No	No	No	No	No	No	No	No	No	Never	Never	Never	Never
Between 33 and 37 years old	Female	Nursing	Between 24-48 hours	No	No, I don’t have a history of psychiatric disease.	No	Not infected.	Yes	Inpatient.	Yes	Yes	No	Yes	Quite a bit.	Quite a bit.	Extremely.	Extremely.	Quite a bit.	Extremely.	Quite a bit.	Not at all.	Extremely.	Extremely.	Not at all.	Moderately.	Moderately.	Extremely.	Extremely.	Extremely.	Quite a bit.	Quite a bit.	Extremely.	Not at all.	Extremely.	Not at all.	Yes	Yes	No	No	No	No	No	No	No	No	Daily or almost daily	Daily or almost daily	Never	Never
Between 38 and 42 years old	Male	Nursing	Over 48 hours	No	No, I don’t have a history of psychiatric disease.	No	Not infected.	No	No relatives infected.	Yes	No	No	Yes	Moderately.	Moderately.	Quite a bit.	Moderately.	Moderately.	Moderately.	Moderately.	Quite a bit.	Moderately.	Quite a bit.	Quite a bit.	Moderately.	A little bit.	Moderately.	Moderately.	Moderately.	Quite a bit.	A little bit.	A little bit.	Quite a bit.	Quite a bit.	A little bit.	No	Yes	No	No	No	No	No	No	No	No	Once or twice	Weekly	Never	Never
Between 48 and 52 years old	Female	Nursing	Up to 24 hours	No	No, I don’t have a history of psychiatric disease.	No	Not infected.	Yes	Outpatient.	Yes	Yes	Yes	Yes	Quite a bit.	Quite a bit.	Extremely.	A little bit.	A little bit.	Extremely.	Extremely.	A little bit.	Extremely.	Extremely.	Quite a bit.	Quite a bit.	Extremely.	Extremely.	Extremely.	Extremely.	Extremely.	Extremely.	Extremely.	Quite a bit.	Quite a bit.	Not at all.	Yes	No	No	No	No	No	No	No	No	No	Daily or almost daily	Never	Never	Never
Between 33 and 37 years old	Male	Nursing	Over 48 hours	No	No, I don’t have a history of psychiatric disease.	Yes	Outpatient.	Yes	Inpatient.	No	No	Yes	Yes	Moderately.	A little bit.	A little bit.	A little bit.	A little bit.	A little bit.	A little bit.	A little bit.	A little bit.	A little bit.	A little bit.	A little bit.	A little bit.	A little bit.	A little bit.	A little bit.	A little bit.	A little bit.	A little bit.	A little bit.	A little bit.	A little bit.	No	Yes	No	No	No	No	No	No	No	No	Never	Monthly	Never	Never
Between 38 and 42 years old	Female	Nursing	Between 24-48 hours	No	No, I don’t have a history of psychiatric disease.	No	Not infected.	No	No relatives infected.	No	No	No	No	Not at all.	Not at all.	A little bit.	A little bit.	A little bit.	A little bit.	A little bit.	A little bit.	A little bit.	A little bit.	A little bit.	A little bit.	Not at all.	A little bit.	A little bit.	A little bit.	A little bit.	Not at all.	Not at all.	A little bit.	Not at all.	A little bit.	No	No	No	No	No	No	No	No	No	No	Never	Once or twice	Never	Never
Between 33 and 37 years old	Female	Nursing	Up to 24 hours	No	No, I don’t have a history of psychiatric disease.	Yes	Outpatient.	No	No relatives infected.	Yes	Yes	No	Yes	A little bit.	Not at all.	A little bit.	A little bit.	A little bit.	A little bit.	Not at all.	Not at all.	Not at all.	Not at all.	A little bit.	Not at all.	Not at all.	Not at all.	Quite a bit.	Quite a bit.	A little bit.	A little bit.	Moderately.	Not at all.	Moderately.	Quite a bit.	No	No	No	No	No	No	No	No	No	No	Never	Never	Never	Never
Between 43 and 47 years old	Female	Nursing	Between 24-48 hours	No	No, I don’t have a history of psychiatric disease.	No	Not infected.	No	No relatives infected.	No	No	No	No	Moderately.	Moderately.	Moderately.	Not at all.	A little bit.	A little bit.	A little bit.	Not at all.	A little bit.	Not at all.	A little bit.	A little bit.	A little bit.	A little bit.	Not at all.	Not at all.	A little bit.	A little bit.	Not at all.	A little bit.	Quite a bit.	A little bit.	No	No	No	No	No	No	No	No	No	No	Never	Never	Never	Never
Between 43 and 47 years old	Male	Nursing	Up to 24 hours	No	No, I don’t have a history of psychiatric disease.	No	Not infected.	No	No relatives infected.	Yes	Yes	Yes	Yes	Quite a bit.	Quite a bit.	Extremely.	Quite a bit.	Quite a bit.	Quite a bit.	Quite a bit.	A little bit.	Quite a bit.	Quite a bit.	Quite a bit.	A little bit.	Quite a bit.	Quite a bit.	Extremely.	Quite a bit.	Quite a bit.	Quite a bit.	Quite a bit.	Quite a bit.	Quite a bit.	Moderately.	Yes	Yes	No	No	No	No	No	No	No	No	Never	Weekly	Never	Never
Between 18 and 22 years old	Male	Nursing	Over 48 hours	No	No, I don’t have a history of psychiatric disease.	No	Not infected.	No	No relatives infected.	Yes	Yes	No	No	A little bit.	A little bit.	A little bit.	Not at all.	A little bit.	Not at all.	Not at all.	Not at all.	Not at all.	Not at all.	Moderately.	Not at all.	Not at all.	Not at all.	Not at all.	Not at all.	A little bit.	Not at all.	Not at all.	Not at all.	A little bit.	Not at all.	No	No	No	No	No	No	No	No	No	No	Never	Never	Never	Never
Between 28 and 32 years old	Male	Not a health care profession	Up to 24 hours	No	No, I don’t have a history of psychiatric disease.	Yes	Outpatient.	Yes	Outpatient.	No	No	No	Yes	A little bit.	Moderately.	A little bit.	A little bit.	Moderately.	A little bit.	A little bit.	Quite a bit.	A little bit.	A little bit.	A little bit.	A little bit.	A little bit.	Moderately.	A little bit.	A little bit.	Quite a bit.	A little bit.	A little bit.	Not at all.	A little bit.	A little bit.	No	Yes	No	No	No	No	No	No	No	No	Once or twice	Weekly	Never	Never
Between 38 and 42 years old	Female	Nursing	Up to 24 hours	No	No, I don’t have a history of psychiatric disease.	Yes	Outpatient.	No	No relatives infected.	Yes	No	No	Yes	A little bit.	A little bit.	Quite a bit.	Not at all.	Quite a bit.	A little bit.	A little bit.	A little bit.	A little bit.	Not at all.	Quite a bit.	A little bit.	Quite a bit.	A little bit.	A little bit.	A little bit.	Quite a bit.	Not at all.	Not at all.	Not at all.	Not at all.	A little bit.	No	Yes	No	No	No	No	No	No	No	No	Never	Monthly	Never	Never
Between 38 and 42 years old	Female	Nursing	Between 24-48 hours	No	No, I don’t have a history of psychiatric disease.	Yes	Outpatient.	No	No relatives infected.	No	Yes	No	Yes	A little bit.	Not at all.	A little bit.	A little bit.	A little bit.	A little bit.	Not at all.	A little bit.	Not at all.	Not at all.	Not at all.	A little bit.	Not at all.	Not at all.	Not at all.	Not at all.	A little bit.	Not at all.	Not at all.	Not at all.	Not at all.	Not at all.	Yes	Yes	No	No	No	No	No	No	No	No	Once or twice	Monthly	Never	Never
Between 33 and 37 years old	Female	Nursing	Up to 24 hours	No	No, I don’t have a history of psychiatric disease.	Yes	Outpatient.	Yes	Outpatient.	Yes	Yes	No	Yes	A little bit.	A little bit.	A little bit.	A little bit.	A little bit.	A little bit.	A little bit.	A little bit.	A little bit.	A little bit.	A little bit.	A little bit.	Not at all.	Not at all.	A little bit.	A little bit.	Quite a bit.	A little bit.	A little bit.	A little bit.	A little bit.	A little bit.	No	No	No	No	No	No	No	No	No	No	Never	Never	Never	Never
Between 33 and 37 years old	Male	Nursing	Over 48 hours	No	No, I don’t have a history of psychiatric disease.	No	Not infected.	No	No relatives infected.	Yes	Yes	Yes	No	Not at all.	Not at all.	A little bit.	Moderately.	Moderately.	A little bit.	Not at all.	A little bit.	A little bit.	Moderately.	Moderately.	Moderately.	Moderately.	Moderately.	Not at all.	A little bit.	Moderately.	Moderately.	Not at all.	Moderately.	Moderately.	A little bit.	Yes	Yes	Yes	Yes	No	No	No	No	No	No	Never	Monthly	Never	Never
Between 38 and 42 years old	Female	Nursing	Over 48 hours	No	No, I don’t have a history of psychiatric disease.	No	Not infected.	Yes	Outpatient.	No	No	No	Yes	A little bit.	A little bit.	A little bit.	Not at all.	Not at all.	A little bit.	A little bit.	A little bit.	A little bit.	Not at all.	A little bit.	A little bit.	A little bit.	Not at all.	Moderately.	A little bit.	A little bit.	Moderately.	Moderately.	Not at all.	A little bit.	Not at all.	Yes	Yes	No	No	No	No	No	No	No	No	Once or twice	Monthly	Never	Never
Between 48 and 52 years old	Female	Psychology	Over 48 hours	No	No, I don’t have a history of psychiatric disease.	Yes	Outpatient.	Yes	Outpatient.	Yes	Yes	No	No	Moderately.	Not at all.	Moderately.	Not at all.	Not at all.	Not at all.	Not at all.	Not at all.	Moderately.	Not at all.	Not at all.	A little bit.	Not at all.	Not at all.	Not at all.	Not at all.	Not at all.	Not at all.	Not at all.	Not at all.	Not at all.	Not at all.	No	No	No	No	No	No	No	No	No	No	Never	Never	Never	Never
Between 33 and 37 years old	Female	Nursing	Between 24-48 hours	No	No, I don’t have a history of psychiatric disease.	Yes	Outpatient.	No	No relatives infected.	Yes	No	No	Yes	Moderately.	Quite a bit.	Moderately.	Moderately.	Moderately.	Quite a bit.	Moderately.	Moderately.	Moderately.	Moderately.	Moderately.	Moderately.	Moderately.	A little bit.	Quite a bit.	A little bit.	A little bit.	Moderately.	Moderately.	A little bit.	A little bit.	Moderately.	No	Yes	Yes	No	No	No	No	No	No	No	Never	Never	Never	Never
Between 33 and 37 years old	Male	Nursing	Between 24-48 hours	No	No, I don’t have a history of psychiatric disease.	No	Not infected.	No	No relatives infected.	No	No	Yes	Yes	A little bit.	Not at all.	A little bit.	Not at all.	Not at all.	Not at all.	Not at all.	Not at all.	Not at all.	Not at all.	Not at all.	Not at all.	Not at all.	Not at all.	Not at all.	Not at all.	Not at all.	Not at all.	Not at all.	Not at all.	Not at all.	Not at all.	Yes	No	Yes	No	No	No	No	No	No	No	Never	Never	Never	Never
Between 28 and 32 years old	Male	Nursing	Up to 24 hours	No	No, I don’t have a history of psychiatric disease.	No	Not infected.	No	No relatives infected.	No	Yes	No	No	Moderately.	Moderately.	Moderately.	Moderately.	Moderately.	Moderately.	Moderately.	Moderately.	Moderately.	Moderately.	Moderately.	Moderately.	Moderately.	Moderately.	Moderately.	Moderately.	Moderately.	Moderately.	Moderately.	Moderately.	Moderately.	Moderately.	No	Yes	No	No	No	No	No	No	No	No	Never	Monthly	Never	Never
Between 38 and 42 years old	Female	Nursing	Up to 24 hours	Yes	Anxiety Disorder(s).	No	Outpatient.	No	Outpatient.	No	No	No	Yes	Quite a bit.	Quite a bit.	Quite a bit.	Not at all.	Moderately.	Quite a bit.	Quite a bit.	A little bit.	Quite a bit.	Quite a bit.	Quite a bit.	Quite a bit.	Quite a bit.	Quite a bit.	Quite a bit.	Moderately.	Moderately.	A little bit.	Quite a bit.	A little bit.	A little bit.	A little bit.	No	No	No	No	No	No	Yes	No	No	No	Never	Never	Never	Never
Between 38 and 42 years old	Male	Nursing	Over 48 hours	No	No, I don’t have a history of psychiatric disease.	Yes	Outpatient.	Yes	Inpatient.	No	Yes	Yes	Yes	Moderately.	Not at all.	Moderately.	A little bit.	A little bit.	A little bit.	Moderately.	Moderately.	Moderately.	Moderately.	Moderately.	Moderately.	Moderately.	Moderately.	Moderately.	Moderately.	Moderately.	Moderately.	Moderately.	Moderately.	Moderately.	Moderately.	No	No	No	No	No	No	No	No	No	No	Never	Never	Never	Never
Between 53 and 57 years old	Female	Nursing	Between 24-48 hours	No	No, I don’t have a history of psychiatric disease.	No	Not infected.	No	No relatives infected.	No	No	No	Yes	A little bit.	Not at all.	Moderately.	A little bit.	A little bit.	Not at all.	Moderately.	Moderately.	Not at all.	A little bit.	A little bit.	Moderately.	Moderately.	Not at all.	Not at all.	Not at all.	Quite a bit.	A little bit.	Not at all.	Not at all.	A little bit.	A little bit.	Yes	No	No	No	No	No	No	No	No	No	Daily or almost daily	Never	Never	Never
Between 43 and 47 years old	Female	Nursing	Between 24-48 hours	No	No, I don’t have a history of psychiatric disease.	No	Not infected.	Yes	Relative perished due to COVID-19.	No	No	Yes	Yes	A little bit.	A little bit.	A little bit.	A little bit.	A little bit.	A little bit.	A little bit.	A little bit.	A little bit.	A little bit.	A little bit.	A little bit.	A little bit.	A little bit.	A little bit.	A little bit.	A little bit.	A little bit.	A little bit.	A little bit.	A little bit.	A little bit.	No	Yes	No	No	No	No	No	No	No	No	Never	Once or twice	Never	Never
Between 33 and 37 years old	Female	Medicine	Over 48 hours	Yes	Mood Disorder(s).	No	Not infected.	Yes	Outpatient.	No	Yes	No	Yes	A little bit.	Not at all.	Not at all.	Moderately.	A little bit.	Not at all.	A little bit.	Not at all.	A little bit.	A little bit.	Quite a bit.	Moderately.	Quite a bit.	A little bit.	Not at all.	Moderately.	Moderately.	Quite a bit.	Not at all.	A little bit.	Moderately.	Quite a bit.	Yes	Yes	Yes	No	Yes	Yes	Yes	No	Yes	No	Weekly	Weekly	Never	Never
Between 43 and 47 years old	Female	Medicine	Between 24-48 hours	No	No, I don’t have a history of psychiatric disease.	Yes	Outpatient.	No	No relatives infected.	No	No	No	Yes	Not at all.	A little bit.	Not at all.	A little bit.	A little bit.	Not at all.	Not at all.	Not at all.	Not at all.	A little bit.	Not at all.	Not at all.	Not at all.	Not at all.	Not at all.	A little bit.	Not at all.	A little bit.	Not at all.	Not at all.	A little bit.	Not at all.	No	Yes	No	No	No	No	No	No	No	No	Never	Monthly	Never	Never
Between 28 and 32 years old	Male	Medicine	Up to 24 hours	Yes	Anxiety Disorder(s).	No	Not infected.	No	No relatives infected.	Yes	No	No	Yes	A little bit.	Moderately.	Moderately.	Quite a bit.	Not at all.	Quite a bit.	Quite a bit.	Quite a bit.	Quite a bit.	Quite a bit.	Moderately.	A little bit.	Moderately.	A little bit.	Quite a bit.	Quite a bit.	Moderately.	Moderately.	Not at all.	Not at all.	Quite a bit.	Not at all.	No	Yes	No	No	No	No	Yes	No	No	No	Never	Weekly	Once or twice	Never
Between 28 and 32 years old	Male	Not a health care profession	I had no exposition to infected patients.	No	No, I don’t have a history of psychiatric disease.	Yes	Outpatient.	Yes	Outpatient.	Yes	Yes	No	No	Not at all.	Not at all.	A little bit.	Not at all.	Not at all.	Not at all.	A little bit.	A little bit.	Not at all.	Not at all.	Quite a bit.	A little bit.	Not at all.	Not at all.	Not at all.	Not at all.	Not at all.	Not at all.	Not at all.	Not at all.	Not at all.	Not at all.	No	No	No	No	No	No	No	No	No	No	Never	Never	Never	Never
Between 43 and 47 years old	Female	Not a health care profession	Up to 24 hours	No	No, I don’t have a history of psychiatric disease.	Yes	Outpatient.	No	No relatives infected.	No	Yes	No	No	Moderately.	Extremely.	Moderately.	Not at all.	A little bit.	A little bit.	Not at all.	A little bit.	A little bit.	Not at all.	A little bit.	A little bit.	Not at all.	Not at all.	Extremely.	A little bit.	A little bit.	Moderately.	Quite a bit.	Not at all.	A little bit.	A little bit.	No	No	No	No	No	No	Yes	No	No	No	Never	Never	Never	Never
Between 43 and 47 years old	Male	Not a health care profession	Over 48 hours	No	No, I don’t have a history of psychiatric disease.	No	Not infected.	No	No relatives infected.	Yes	Yes	No	Yes	Quite a bit.	Not at all.	A little bit.	A little bit.	A little bit.	A little bit.	Moderately.	A little bit.	A little bit.	Not at all.	A little bit.	A little bit.	A little bit.	A little bit.	Quite a bit.	A little bit.	Quite a bit.	A little bit.	Not at all.	Not at all.	Moderately.	Quite a bit.	No	No	No	No	No	No	No	No	No	No	Never	Monthly	Never	Never
Between 33 and 37 years old	Female	Nursing	Between 24-48 hours	No	No, I don’t have a history of psychiatric disease.	Yes	Outpatient.	No	No relatives infected.	Yes	Yes	Yes	No	Moderately.	A little bit.	A little bit.	A little bit.	A little bit.	A little bit.	A little bit.	Not at all.	A little bit.	A little bit.	Quite a bit.	A little bit.	A little bit.	A little bit.	Quite a bit.	Quite a bit.	Moderately.	A little bit.	A little bit.	Not at all.	A little bit.	Quite a bit.	No	Yes	No	No	No	No	No	No	No	No	Never	Once or twice	Never	Never
Between 48 and 52 years old	Female	Nursing	Up to 24 hours	No	No, I don’t have a history of psychiatric disease.	Yes	Outpatient.	Yes	Outpatient.	No	No	No	No	A little bit.	Not at all.	Moderately.	A little bit.	A little bit.	Not at all.	A little bit.	A little bit.	A little bit.	A little bit.	A little bit.	A little bit.	A little bit.	A little bit.	Not at all.	A little bit.	A little bit.	A little bit.	A little bit.	Not at all.	A little bit.	A little bit.	No	Yes	No	No	No	No	No	No	No	No	Never	Once or twice	Never	Never
Between 43 and 47 years old	Female	Nursing	Over 48 hours	No	No, I don’t have a history of psychiatric disease.	No	Not infected.	No	No relatives infected.	Yes	Yes	Yes	No	A little bit.	Not at all.	A little bit.	Not at all.	Quite a bit.	Not at all.	A little bit.	A little bit.	Moderately.	A little bit.	Quite a bit.	Moderately.	Not at all.	Not at all.	Not at all.	Not at all.	Quite a bit.	Not at all.	Not at all.	Not at all.	A little bit.	Moderately.	No	No	No	No	No	No	No	No	No	No	Never	Never	Never	Never
Between 38 and 42 years old	Female	Nursing	Between 24-48 hours	No	No, I don’t have a history of psychiatric disease.	Yes	Outpatient.	No	No relatives infected.	No	Yes	No	Yes	Not at all.	Not at all.	A little bit.	Not at all.	Not at all.	A little bit.	A little bit.	Not at all.	Not at all.	Not at all.	A little bit.	A little bit.	A little bit.	Not at all.	Not at all.	Not at all.	Not at all.	Not at all.	Not at all.	Not at all.	Moderately.	A little bit.	No	No	No	No	No	No	No	No	No	No	Never	Never	Never	Never
Between 43 and 47 years old	Female	Nursing	Between 24-48 hours	No	No, I don’t have a history of psychiatric disease.	Yes	Outpatient.	Yes	Outpatient.	No	No	No	Yes	A little bit.	Not at all.	A little bit.	A little bit.	Not at all.	A little bit.	A little bit.	Not at all.	Not at all.	Not at all.	Quite a bit.	Not at all.	A little bit.	Not at all.	Not at all.	Not at all.	Quite a bit.	Not at all.	Not at all.	Not at all.	A little bit.	A little bit.	No	No	No	No	No	No	No	No	No	No	Never	Never	Never	Never
Between 38 and 42 years old	Female	Nursing	Between 24-48 hours	Yes	Anxiety Disorder(s).	Yes	Outpatient.	No	No relatives infected.	Yes	Yes	Yes	Yes	Quite a bit.	Moderately.	Quite a bit.	Quite a bit.	Quite a bit.	Quite a bit.	Moderately.	Not at all.	Quite a bit.	Quite a bit.	Quite a bit.	A little bit.	Quite a bit.	Quite a bit.	Quite a bit.	Quite a bit.	Quite a bit.	Quite a bit.	A little bit.	Not at all.	Quite a bit.	Quite a bit.	Yes	Yes	No	No	No	No	Yes	No	Yes	No	Never	Weekly	Never	Never
Between 43 and 47 years old	Female	Nursing	Between 24-48 hours	No	No, I don’t have a history of psychiatric disease.	Yes	Outpatient.	No	No relatives infected.	No	Yes	No	Yes	Extremely.	Moderately.	Moderately.	A little bit.	Quite a bit.	Quite a bit.	Moderately.	Extremely.	Quite a bit.	Quite a bit.	Quite a bit.	Quite a bit.	Extremely.	Quite a bit.	Quite a bit.	Quite a bit.	Quite a bit.	Not at all.	Quite a bit.	Not at all.	Quite a bit.	Quite a bit.	No	No	No	No	No	No	No	No	No	No	Never	Never	Never	Never
Between 28 and 32 years old	Male	Medicine	Between 24-48 hours	No	No, I don’t have a history of psychiatric disease.	No	Not infected.	Yes	Relative perished due to COVID-19.	No	No	No	Yes	Moderately.	A little bit.	Quite a bit.	Quite a bit.	Quite a bit.	Moderately.	Moderately.	Quite a bit.	A little bit.	Moderately.	Moderately.	Moderately.	A little bit.	Moderately.	A little bit.	Moderately.	A little bit.	Moderately.	Not at all.	Not at all.	A little bit.	A little bit.	Yes	Yes	Yes	No	No	No	No	No	No	No	Never	Weekly	Never	Never
Between 23 and 27 years old	Male	Medicine	Over 48 hours	No	No, I don’t have a history of psychiatric disease.	Yes	Inpatient.	Yes	Outpatient.	No	No	No	Yes	A little bit.	Not at all.	A little bit.	Moderately.	Moderately.	Not at all.	A little bit.	A little bit.	Not at all.	A little bit.	A little bit.	A little bit.	A little bit.	A little bit.	Not at all.	A little bit.	Not at all.	A little bit.	A little bit.	Not at all.	A little bit.	A little bit.	No	No	No	No	No	No	No	No	No	No	Never	Never	Never	Never
Between 43 and 47 years old	Female	Not a health care profession	Over 48 hours	Yes	Other.	Yes	Outpatient.	No	No relatives infected.	No	No	No	No	Quite a bit.	A little bit.	Quite a bit.	A little bit.	Quite a bit.	Quite a bit.	A little bit.	A little bit.	Quite a bit.	A little bit.	A little bit.	Quite a bit.	Quite a bit.	Quite a bit.	Quite a bit.	Quite a bit.	Quite a bit.	Quite a bit.	A little bit.	Quite a bit.	A little bit.	Quite a bit.	Yes	No	No	No	No	No	No	No	No	No	Monthly	Never	Never	Never
Between 28 and 32 years old	Male	Medicine	Between 24-48 hours	No	No, I don’t have a history of psychiatric disease.	No	Not infected.	No	No relatives infected.	No	No	No	Yes	Not at all.	Moderately.	Not at all.	A little bit.	Not at all.	Not at all.	Not at all.	Not at all.	Not at all.	Not at all.	A little bit.	Not at all.	Not at all.	Not at all.	Moderately.	Moderately.	Not at all.	Not at all.	Not at all.	Not at all.	Not at all.	Not at all.	No	Yes	No	No	No	No	No	No	No	No	Never	Once or twice	Never	Never
Between 23 and 27 years old	Male	Nursing	Up to 24 hours	No	No, I don’t have a history of psychiatric disease.	No	Not infected.	No	No relatives infected.	Yes	Yes	No	Yes	A little bit.	A little bit.	A little bit.	A little bit.	A little bit.	Moderately.	A little bit.	Not at all.	A little bit.	A little bit.	Moderately.	Moderately.	A little bit.	A little bit.	A little bit.	Moderately.	Moderately.	Moderately.	Quite a bit.	A little bit.	A little bit.	A little bit.	No	No	No	No	No	No	Yes	No	No	No	Never	Never	Never	Never
Between 38 and 42 years old	Male	Nursing	Between 24-48 hours	No	No, I don’t have a history of psychiatric disease.	No	Not infected.	No	No relatives infected.	Yes	Yes	No	No	Not at all.	Not at all.	Not at all.	A little bit.	A little bit.	Not at all.	Not at all.	Not at all.	Not at all.	Not at all.	Not at all.	Not at all.	Not at all.	Not at all.	Not at all.	Not at all.	Not at all.	Not at all.	Not at all.	A little bit.	Not at all.	Not at all.	No	Yes	No	No	No	No	No	No	No	No	Never	Once or twice	Never	Never
Between 53 and 57 years old	Female	Social Services	Between 24-48 hours	No	Other.	Yes	Outpatient.	Yes	Outpatient.	No	Yes	No	No	Not at all.	Not at all.	Not at all.	Not at all.	Not at all.	Not at all.	Not at all.	Not at all.	Not at all.	Not at all.	Not at all.	Not at all.	Not at all.	Not at all.	Not at all.	Not at all.	A little bit.	Not at all.	A little bit.	Not at all.	Not at all.	Not at all.	No	No	No	No	No	No	No	No	No	No	Never	Once or twice	Never	Never
Between 33 and 37 years old	Female	Psychology	Over 48 hours	No	No, I don’t have a history of psychiatric disease.	Yes	Outpatient.	No	No relatives infected.	Yes	Yes	No	No	Not at all.	Not at all.	Not at all.	A little bit.	A little bit.	A little bit.	Not at all.	Not at all.	Not at all.	Not at all.	Not at all.	Not at all.	Not at all.	Not at all.	Not at all.	Not at all.	Not at all.	Not at all.	Not at all.	A little bit.	Not at all.	Not at all.	No	Yes	No	No	No	No	No	No	No	No	Never	Once or twice	Never	Never
Between 28 and 32 years old	Male	Not a health care profession	Up to 24 hours	No	Other.	No	Not infected.	No	No relatives infected.	No	Yes	No	No	A little bit.	Quite a bit.	Not at all.	Not at all.	Not at all.	Not at all.	Not at all.	Not at all.	Not at all.	Not at all.	Not at all.	Not at all.	Not at all.	Not at all.	Not at all.	Not at all.	Not at all.	Not at all.	Not at all.	Not at all.	Not at all.	Not at all.	No	Yes	No	No	No	No	No	No	No	No	Never	Monthly	Never	Never
Between 33 and 37 years old	Female	Nursing	Over 48 hours	No	No, I don’t have a history of psychiatric disease.	Yes	Outpatient.	Yes	ICU.	No	Yes	No	Yes	A little bit.	A little bit.	Not at all.	Moderately.	A little bit.	A little bit.	A little bit.	A little bit.	Not at all.	A little bit.	A little bit.	A little bit.	A little bit.	A little bit.	Moderately.	A little bit.	A little bit.	Moderately.	A little bit.	A little bit.	A little bit.	A little bit.	No	Yes	No	No	No	No	No	No	No	No	Never	Never	Never	Never
Between 48 and 52 years old	Female	Nursing	I had no exposition to infected patients.	No	No, I don’t have a history of psychiatric disease.	No	Not infected.	No	No relatives infected.	Yes	Yes	No	Yes	Quite a bit.	Moderately.	Moderately.	Moderately.	Moderately.	A little bit.	Moderately.	Moderately.	A little bit.	Not at all.	A little bit.	A little bit.	A little bit.	A little bit.	A little bit.	A little bit.	A little bit.	A little bit.	Not at all.	A little bit.	A little bit.	A little bit.	No	No	No	No	No	No	No	No	No	No	Never	Never	Never	Never
Between 38 and 42 years old	Female	Nursing	Between 24-48 hours	Yes	Anxiety Disorder(s).	Yes	Outpatient.	Yes	Outpatient.	No	Yes	No	No	A little bit.	Not at all.	A little bit.	Not at all.	A little bit.	A little bit.	Moderately.	A little bit.	A little bit.	Moderately.	A little bit.	A little bit.	A little bit.	A little bit.	Not at all.	Moderately.	A little bit.	Not at all.	Not at all.	Not at all.	A little bit.	Moderately.	No	Yes	Yes	No	No	No	No	No	No	No	Once or twice	Weekly	Never	Never
Between 38 and 42 years old	Female	Nursing	Between 24-48 hours	No	No, I don’t have a history of psychiatric disease.	Yes	Outpatient.	Yes	Outpatient.	Yes	No	Yes	No	Quite a bit.	Quite a bit.	Quite a bit.	Moderately.	Quite a bit.	Quite a bit.	Moderately.	Not at all.	A little bit.	A little bit.	Moderately.	Quite a bit.	Not at all.	Quite a bit.	Quite a bit.	Quite a bit.	Moderately.	A little bit.	Quite a bit.	Not at all.	Extremely.	Quite a bit.	No	Yes	No	No	No	No	No	No	No	No	Never	Monthly	Never	Never
Between 28 and 32 years old	Male	Nursing	Up to 24 hours	No	No, I don’t have a history of psychiatric disease.	Yes	Inpatient.	Yes	Inpatient.	Yes	Yes	No	Yes	Moderately.	Quite a bit.	Moderately.	Moderately.	Moderately.	Moderately.	Moderately.	Moderately.	Moderately.	Moderately.	Moderately.	Moderately.	Moderately.	Moderately.	Moderately.	Moderately.	Moderately.	Moderately.	Moderately.	Moderately.	Moderately.	Moderately.	Yes	Yes	No	No	No	No	No	No	No	No	Daily or almost daily	Once or twice	Never	Never
Between 33 and 37 years old	Female	Nursing	Between 24-48 hours	No	No, I don’t have a history of psychiatric disease.	Yes	Outpatient.	Yes	Relative perished due to COVID-19.	No	Yes	No	Yes	Quite a bit.	Not at all.	Quite a bit.	A little bit.	A little bit.	Quite a bit.	Quite a bit.	A little bit.	A little bit.	A little bit.	A little bit.	A little bit.	A little bit.	A little bit.	Not at all.	Not at all.	A little bit.	A little bit.	A little bit.	A little bit.	A little bit.	A little bit.	Yes	Yes	No	No	No	No	No	No	No	No	Daily or almost daily	Weekly	Never	Never
Between 38 and 42 years old	Female	Nursing	Between 24-48 hours	No	No, I don’t have a history of psychiatric disease.	Yes	Outpatient.	No	No relatives infected.	No	No	No	No	A little bit.	A little bit.	A little bit.	Not at all.	Not at all.	Not at all.	A little bit.	A little bit.	A little bit.	Not at all.	A little bit.	A little bit.	Not at all.	Not at all.	Not at all.	Not at all.	A little bit.	Not at all.	Not at all.	Not at all.	A little bit.	A little bit.	No	No	No	No	No	No	No	No	No	No	Never	Once or twice	Never	Never
Between 48 and 52 years old	Male	Nursing	Between 24-48 hours	No	No, I don’t have a history of psychiatric disease.	No	Not infected.	No	No relatives infected.	No	Yes	No	No	Not at all.	Not at all.	Not at all.	Not at all.	Not at all.	Not at all.	Not at all.	Not at all.	Not at all.	Not at all.	Not at all.	Not at all.	Not at all.	Not at all.	Not at all.	Not at all.	Not at all.	Not at all.	Not at all.	Not at all.	Not at all.	Not at all.	Yes	Yes	No	No	No	No	No	No	No	No	Daily or almost daily	Monthly	Never	Never
Between 43 and 47 years old	Male	Not a health care profession	Up to 24 hours	No	No, I don’t have a history of psychiatric disease.	No	Not infected.	No	No relatives infected.	No	Yes	No	No	Not at all.	Not at all.	Not at all.	Not at all.	Not at all.	Not at all.	Not at all.	Not at all.	Not at all.	Not at all.	Not at all.	Not at all.	Not at all.	Not at all.	Not at all.	Not at all.	Not at all.	Not at all.	Not at all.	Not at all.	Not at all.	Not at all.	Yes	Yes	No	No	No	No	No	No	No	No	Never	Never	Never	Never
Between 38 and 42 years old	Female	Nursing	Over 48 hours	No	No, I don’t have a history of psychiatric disease.	No	Not infected.	No	No relatives infected.	Yes	Yes	No	No	A little bit.	A little bit.	A little bit.	A little bit.	A little bit.	A little bit.	A little bit.	A little bit.	Not at all.	Not at all.	Not at all.	Not at all.	Not at all.	Not at all.	Not at all.	Not at all.	Not at all.	Not at all.	Not at all.	Not at all.	Not at all.	Not at all.	No	No	No	No	No	No	No	No	No	No	Never	Never	Never	Never
Between 28 and 32 years old	Male	Not a health care profession	Between 24-48 hours	No	No, I don’t have a history of psychiatric disease.	No	Not infected.	No	No relatives infected.	Yes	No	No	No	A little bit.	Not at all.	A little bit.	Not at all.	Not at all.	A little bit.	A little bit.	Quite a bit.	Not at all.	A little bit.	Not at all.	Not at all.	A little bit.	A little bit.	Not at all.	Not at all.	Not at all.	Not at all.	Not at all.	Not at all.	Not at all.	Not at all.	No	No	No	No	No	No	No	No	No	No	Never	Never	Never	Never
Between 33 and 37 years old	Male	Not a health care profession	I had no exposition to infected patients.	No	No, I don’t have a history of psychiatric disease.	Yes	Outpatient.	No	No relatives infected.	No	Yes	No	No	Not at all.	Not at all.	Not at all.	Not at all.	Not at all.	Not at all.	Not at all.	Not at all.	Not at all.	Not at all.	Not at all.	Not at all.	Not at all.	Not at all.	Not at all.	Not at all.	Not at all.	Not at all.	Not at all.	Not at all.	Not at all.	Not at all.	No	No	No	No	No	No	No	No	No	No	Never	Never	Never	Never
Between 43 and 47 years old	Male	Nursing	Over 48 hours	Yes	Other.	Yes	Outpatient.	Yes	Outpatient.	Yes	No	No	Yes	Not at all.	A little bit.	A little bit.	A little bit.	A little bit.	A little bit.	A little bit.	A little bit.	A little bit.	A little bit.	A little bit.	A little bit.	Not at all.	A little bit.	Moderately.	Moderately.	A little bit.	A little bit.	A little bit.	Not at all.	A little bit.	A little bit.	No	Yes	No	No	Yes	No	Yes	No	No	No	Never	Monthly	Never	Never
Between 43 and 47 years old	Male	Not a health care profession	I had no exposition to infected patients.	No	No, I don’t have a history of psychiatric disease.	No	Not infected.	No	No relatives infected.	No	No	No	No	Not at all.	Not at all.	Not at all.	Not at all.	Not at all.	Not at all.	Not at all.	Not at all.	Not at all.	Not at all.	Not at all.	Not at all.	Not at all.	Not at all.	Not at all.	Not at all.	Not at all.	Not at all.	Not at all.	Not at all.	Not at all.	Not at all.	Yes	Yes	No	No	No	No	No	No	No	No	Never	Never	Never	Never
Between 48 and 52 years old	Male	Not a health care profession	Up to 24 hours	No	No, I don’t have a history of psychiatric disease.	Yes	Not infected.	No	No relatives infected.	Yes	No	No	No	Not at all.	Not at all.	Not at all.	Not at all.	Not at all.	Not at all.	Not at all.	Not at all.	Not at all.	Not at all.	Not at all.	Not at all.	Not at all.	Not at all.	Not at all.	Not at all.	Not at all.	Not at all.	Not at all.	Not at all.	Not at all.	Not at all.	No	Yes	No	No	No	No	No	No	No	No	Never	Never	Never	Never
Between 33 and 37 years old	Female	Not a health care profession	Up to 24 hours	No	No, I don’t have a history of psychiatric disease.	No	Not infected.	No	No relatives infected.	Yes	Yes	No	No	Not at all.	Not at all.	Not at all.	Not at all.	Not at all.	Not at all.	Not at all.	Not at all.	Not at all.	Not at all.	Not at all.	Not at all.	Not at all.	Not at all.	Not at all.	Not at all.	Not at all.	Not at all.	Not at all.	Not at all.	Not at all.	Not at all.	No	No	No	No	No	No	No	No	No	No	Never	Never	Never	Never
Between 33 and 37 years old	Female	Medicine	Between 24-48 hours	No	No, I don’t have a history of psychiatric disease.	No	Not infected.	Yes	Outpatient.	No	No	No	Yes	Not at all.	Not at all.	Not at all.	Not at all.	Moderately.	Not at all.	A little bit.	Not at all.	A little bit.	A little bit.	Quite a bit.	Not at all.	Not at all.	Not at all.	Not at all.	Not at all.	Not at all.	Not at all.	Not at all.	A little bit.	Not at all.	A little bit.	No	Yes	No	No	No	No	No	No	No	No	Never	Weekly	Never	Never
Between 38 and 42 years old	Male	Nursing	Between 24-48 hours	No	No, I don’t have a history of psychiatric disease.	Yes	Outpatient.	Yes	Outpatient.	No	Yes	Yes	Yes	Extremely.	Quite a bit.	Quite a bit.	A little bit.	Extremely.	Extremely.	Not at all.	Quite a bit.	Extremely.	Extremely.	Extremely.	Extremely.	Extremely.	Extremely.	Moderately.	Extremely.	Extremely.	Extremely.	Extremely.	Extremely.	Extremely.	A little bit.	No	No	No	No	No	No	No	No	No	No	Never	Never	Never	Never
Between 38 and 42 years old	Female	Nursing	Between 24-48 hours	Yes	Anxiety Disorder(s).	Yes	Outpatient.	Yes	Outpatient.	No	Yes	No	Yes	Quite a bit.	Extremely.	A little bit.	Quite a bit.	A little bit.	A little bit.	A little bit.	A little bit.	Not at all.	A little bit.	A little bit.	A little bit.	A little bit.	Not at all.	Extremely.	Quite a bit.	A little bit.	Extremely.	Moderately.	Not at all.	A little bit.	A little bit.	No	Yes	No	No	No	No	Yes	No	No	No	Never	Once or twice	Never	Never
Between 23 and 27 years old	Male	Medicine	Up to 24 hours	No	No, I don’t have a history of psychiatric disease.	No	Not infected.	No	No relatives infected.	Yes	No	No	No	Not at all.	Not at all.	Not at all.	A little bit.	Quite a bit.	A little bit.	Quite a bit.	Not at all.	Not at all.	Not at all.	Quite a bit.	Not at all.	Not at all.	Not at all.	A little bit.	Not at all.	Not at all.	Not at all.	Not at all.	Not at all.	Moderately.	Moderately.	Yes	Yes	Yes	No	No	No	No	No	No	No	Weekly	Weekly	Once or twice	Never
Between 28 and 32 years old	Male	Nursing	Over 48 hours	No	No, I don’t have a history of psychiatric disease.	No	Not infected.	No	No relatives infected.	Yes	Yes	No	No	Not at all.	Not at all.	Not at all.	Not at all.	Not at all.	Not at all.	Not at all.	Not at all.	Not at all.	Not at all.	Not at all.	Not at all.	Not at all.	Not at all.	Not at all.	Not at all.	Not at all.	Not at all.	Not at all.	Not at all.	Not at all.	Not at all.	No	No	No	No	No	No	No	No	No	No	Never	Never	Never	Never
Between 33 and 37 years old	Female	Nursing	Between 24-48 hours	No	No, I don’t have a history of psychiatric disease.	No	Not infected.	No	No relatives infected.	Yes	No	No	Yes	Moderately.	Quite a bit.	Quite a bit.	Quite a bit.	Moderately.	Extremely.	Quite a bit.	Moderately.	Moderately.	Quite a bit.	Moderately.	Moderately.	Moderately.	Moderately.	Quite a bit.	Quite a bit.	Moderately.	Quite a bit.	Quite a bit.	Moderately.	Moderately.	Quite a bit.	Yes	Yes	No	No	No	No	No	No	No	No	Daily or almost daily	Weekly	Never	Never
Between 23 and 27 years old	Female	Physiotherapy	Up to 24 hours	No	No, I don’t have a history of psychiatric disease.	No	Not infected.	Yes	Relative perished due to COVID-19.	No	No	Yes	Yes	Moderately.	A little bit.	Moderately.	Quite a bit.	Quite a bit.	Extremely.	Quite a bit.	Not at all.	Moderately.	Moderately.	Quite a bit.	Quite a bit.	A little bit.	Not at all.	A little bit.	Quite a bit.	A little bit.	Quite a bit.	Not at all.	Moderately.	Moderately.	A little bit.	No	Yes	No	No	No	No	No	No	No	No	Never	Weekly	Never	Never
Between 23 and 27 years old	Female	Nursing	Up to 24 hours	Yes	Anxiety Disorder(s).	Yes	Outpatient.	Yes	Outpatient.	Yes	No	Yes	Yes	Quite a bit.	Quite a bit.	Quite a bit.	Moderately.	Extremely.	Quite a bit.	Quite a bit.	Moderately.	Quite a bit.	Quite a bit.	Moderately.	Moderately.	Moderately.	Quite a bit.	Extremely.	Extremely.	Quite a bit.	Quite a bit.	Quite a bit.	Quite a bit.	Quite a bit.	Quite a bit.	No	No	No	No	No	No	No	No	No	No	Never	Never	Never	Never
Between 38 and 42 years old	Male	Nursing	Between 24-48 hours	No	Mood Disorder(s).	Yes	ICU.	Yes	Outpatient.	Yes	No	No	Yes	Extremely.	Quite a bit.	Quite a bit.	Extremely.	Quite a bit.	Quite a bit.	Quite a bit.	Quite a bit.	Quite a bit.	Extremely.	Not at all.	Quite a bit.	Quite a bit.	Quite a bit.	Extremely.	Extremely.	Quite a bit.	Quite a bit.	Extremely.	Quite a bit.	Quite a bit.	Not at all.	No	No	No	No	No	No	No	No	No	No	Never	Never	Never	Never
Between 33 and 37 years old	Female	Nursing	Between 24-48 hours	No	No, I don’t have a history of psychiatric disease.	Yes	Outpatient.	No	No relatives infected.	No	No	No	Yes	Quite a bit.	Extremely.	Quite a bit.	Moderately.	Moderately.	Extremely.	Quite a bit.	Moderately.	Extremely.	Extremely.	Extremely.	Extremely.	Moderately.	Moderately.	Extremely.	Extremely.	Extremely.	Extremely.	Extremely.	Extremely.	Extremely.	Extremely.	No	No	No	No	No	No	No	No	No	No	Never	Never	Never	Never
Between 28 and 32 years old	Male	Medicine	Over 48 hours	No	No, I don’t have a history of psychiatric disease.	No	Not infected.	No	No relatives infected.	No	No	Yes	Yes	Quite a bit.	Moderately.	Extremely.	Quite a bit.	Moderately.	Quite a bit.	Moderately.	A little bit.	A little bit.	Moderately.	Moderately.	Moderately.	Moderately.	Moderately.	Quite a bit.	Moderately.	Quite a bit.	Moderately.	Not at all.	Moderately.	A little bit.	A little bit.	Yes	Yes	No	No	No	No	No	No	No	No	Daily or almost daily	Weekly	Never	Never
Between 28 and 32 years old	Male	Medicine	Over 48 hours	No	No, I don’t have a history of psychiatric disease.	No	Not infected.	Yes	Outpatient.	Yes	No	No	Yes	Moderately.	Not at all.	A little bit.	Not at all.	Moderately.	A little bit.	Not at all.	Not at all.	A little bit.	A little bit.	Not at all.	Not at all.	A little bit.	Not at all.	Not at all.	Moderately.	Not at all.	Moderately.	Not at all.	Not at all.	Not at all.	Not at all.	No	Yes	No	No	No	No	No	No	No	No	Never	Weekly	Once or twice	Never
Between 28 and 32 years old	Male	Nursing	Over 48 hours	No	No, I don’t have a history of psychiatric disease.	No	Not infected.	Yes	Outpatient.	Yes	Yes	Yes	Yes	A little bit.	Moderately.	Moderately.	Moderately.	Moderately.	A little bit.	Moderately.	A little bit.	A little bit.	A little bit.	A little bit.	A little bit.	A little bit.	A little bit.	Moderately.	Moderately.	A little bit.	Moderately.	Moderately.	Moderately.	Quite a bit.	A little bit.	Yes	Yes	Yes	No	No	No	No	No	No	No	Never	Monthly	Once or twice	Never
Between 43 and 47 years old	Female	Nursing	Between 24-48 hours	No	No, I don’t have a history of psychiatric disease.	No	Not infected.	Yes	Outpatient.	Yes	Yes	Yes	Yes	Extremely.	Quite a bit.	Extremely.	Extremely.	Extremely.	Quite a bit.	Not at all.	A little bit.	Moderately.	Quite a bit.	Moderately.	Moderately.	Moderately.	Quite a bit.	Quite a bit.	Quite a bit.	Quite a bit.	Moderately.	Quite a bit.	Moderately.	Quite a bit.	Moderately.	No	Yes	No	No	No	No	No	No	No	No	Never	Weekly	Never	Never
Between 48 and 52 years old	Male	Nursing	Up to 24 hours	No	No, I don’t have a history of psychiatric disease.	No	Not infected.	Yes	Relative perished due to COVID-19.	Yes	No	No	No	Not at all.	Not at all.	Not at all.	Not at all.	Not at all.	Not at all.	Not at all.	Not at all.	Not at all.	Not at all.	Not at all.	Not at all.	Not at all.	Not at all.	Not at all.	Not at all.	Not at all.	Not at all.	Not at all.	Not at all.	Not at all.	Not at all.	Yes	Yes	No	No	No	No	No	No	No	No	Once or twice	Once or twice	Never	Never
Between 43 and 47 years old	Female	Nursing	Up to 24 hours	No	No, I don’t have a history of psychiatric disease.	No	Not infected.	No	No relatives infected.	Yes	Yes	No	No	A little bit.	A little bit.	A little bit.	A little bit.	A little bit.	Quite a bit.	Moderately.	A little bit.	Quite a bit.	A little bit.	Quite a bit.	Quite a bit.	Moderately.	A little bit.	A little bit.	Moderately.	A little bit.	Not at all.	Not at all.	Not at all.	Not at all.	A little bit.	No	No	No	No	No	No	No	No	No	No	Never	Never	Never	Never
Between 38 and 42 years old	Male	Nursing	Over 48 hours	No	No, I don’t have a history of psychiatric disease.	No	Not infected.	No	No relatives infected.	Yes	No	No	No	Not at all.	Not at all.	Not at all.	Not at all.	Not at all.	Not at all.	Not at all.	Not at all.	Not at all.	Not at all.	Not at all.	Not at all.	Not at all.	Not at all.	Not at all.	Not at all.	Not at all.	Not at all.	Not at all.	Not at all.	Not at all.	Not at all.	No	Yes	No	No	No	No	No	No	No	No	Never	Once or twice	Never	Never
Between 38 and 42 years old	Male	Nursing	Over 48 hours	No	No, I don’t have a history of psychiatric disease.	Yes	Outpatient.	Yes	Outpatient.	No	Yes	No	Yes	Moderately.	Moderately.	Moderately.	Moderately.	Moderately.	Moderately.	Moderately.	Moderately.	Moderately.	Moderately.	Moderately.	Moderately.	Moderately.	Moderately.	Moderately.	Moderately.	Moderately.	Moderately.	Not at all.	Not at all.	Moderately.	Not at all.	Yes	Yes	No	No	No	No	No	No	No	No	Never	Never	Never	Never
Between 53 and 57 years old	Female	Nursing	Up to 24 hours	No	No, I don’t have a history of psychiatric disease.	Yes	Outpatient.	No	Outpatient.	No	Yes	No	No	Moderately.	Not at all.	Moderately.	Not at all.	Moderately.	Moderately.	Moderately.	Not at all.	Not at all.	A little bit.	Moderately.	Moderately.	Moderately.	A little bit.	Not at all.	A little bit.	Moderately.	Not at all.	A little bit.	A little bit.	Moderately.	Not at all.	Yes	No	No	No	No	No	No	No	No	No	Never	Never	Never	Never
Between 48 and 52 years old	Female	Nursing	Over 48 hours	No	No, I don’t have a history of psychiatric disease.	Yes	Outpatient.	Yes	Outpatient.	No	Yes	No	Yes	A little bit.	Not at all.	A little bit.	A little bit.	A little bit.	A little bit.	A little bit.	A little bit.	Not at all.	Not at all.	A little bit.	A little bit.	A little bit.	A little bit.	Not at all.	Not at all.	A little bit.	A little bit.	Not at all.	Not at all.	A little bit.	A little bit.	No	Yes	No	No	No	No	No	No	No	No	Never	Monthly	Never	Never
Between 48 and 52 years old	Male	Nursing	Between 24-48 hours	No	No, I don’t have a history of psychiatric disease.	Yes	Outpatient.	No	No relatives infected.	Yes	No	No	Yes	A little bit.	Moderately.	A little bit.	A little bit.	A little bit.	A little bit.	A little bit.	A little bit.	A little bit.	A little bit.	Quite a bit.	Moderately.	A little bit.	Not at all.	Quite a bit.	Moderately.	Moderately.	Quite a bit.	A little bit.	Not at all.	Moderately.	Not at all.	No	Yes	Yes	No	No	No	No	No	No	No	Never	Monthly	Once or twice	Never
Between 33 and 37 years old	Male	Nursing	Over 48 hours	No	No, I don’t have a history of psychiatric disease.	No	Not infected.	Yes	Outpatient.	Yes	Yes	No	No	Not at all.	Moderately.	A little bit.	Moderately.	A little bit.	Moderately.	A little bit.	A little bit.	Not at all.	A little bit.	Moderately.	Moderately.	Moderately.	A little bit.	Quite a bit.	Quite a bit.	Moderately.	A little bit.	A little bit.	Not at all.	Quite a bit.	A little bit.	No	Yes	No	No	No	No	No	No	No	No	Never	Weekly	Never	Never
Between 43 and 47 years old	Male	Nursing	Up to 24 hours	No	No, I don’t have a history of psychiatric disease.	Yes	Outpatient.	No	No relatives infected.	Yes	No	No	No	Not at all.	Not at all.	A little bit.	Not at all.	Not at all.	Not at all.	A little bit.	Not at all.	Not at all.	Not at all.	Not at all.	A little bit.	Not at all.	Not at all.	Not at all.	Not at all.	Not at all.	Moderately.	A little bit.	Not at all.	Not at all.	Not at all.	No	Yes	No	No	No	No	No	No	No	No	Never	Once or twice	Never	Never
Between 33 and 37 years old	Female	Nursing	Over 48 hours	No	No, I don’t have a history of psychiatric disease.	No	Not infected.	Yes	Outpatient.	No	No	No	No	A little bit.	Not at all.	A little bit.	A little bit.	A little bit.	A little bit.	A little bit.	Moderately.	A little bit.	A little bit.	Quite a bit.	A little bit.	Not at all.	A little bit.	Not at all.	A little bit.	A little bit.	Not at all.	Not at all.	Not at all.	Not at all.	Quite a bit.	Yes	Yes	No	No	No	No	No	No	No	No	Weekly	Weekly	Never	Never
Between 38 and 42 years old	Female	Nursing	Up to 24 hours	No	No, I don’t have a history of psychiatric disease.	Yes	Outpatient.	Yes	ICU.	Yes	Yes	No	Yes	Moderately.	Quite a bit.	Quite a bit.	Not at all.	Quite a bit.	Moderately.	Moderately.	A little bit.	Moderately.	A little bit.	Moderately.	Not at all.	A little bit.	Moderately.	Moderately.	Quite a bit.	Moderately.	Moderately.	A little bit.	Not at all.	Quite a bit.	A little bit.	No	No	No	No	No	No	No	No	No	No	Never	Never	Never	Never
Between 38 and 42 years old	Male	Nursing	Between 24-48 hours	No	No, I don’t have a history of psychiatric disease.	Yes	Outpatient.	Yes	Outpatient.	Yes	No	No	No	A little bit.	A little bit.	A little bit.	A little bit.	A little bit.	Moderately.	A little bit.	Moderately.	Quite a bit.	A little bit.	Moderately.	A little bit.	A little bit.	A little bit.	A little bit.	A little bit.	Moderately.	Not at all.	A little bit.	Not at all.	A little bit.	A little bit.	No	Yes	No	No	No	No	No	No	No	No	Never	Monthly	Never	Never
[truncated: 57 more columns]
